# Supplementary material
Source: publisher figshare collection journal article supplement (https://acs.figshare.com/ndownloader/files/4227340)
Supplement: Supplementary file 1 [file 4227340]

# Enhanced Luminescent Iridium(III) Complexes Bearing Aryltriazole Cyclometallated Ligands

*Sébastien Ladouceur, Daniel Fortin and Eli Zysman-Colman\*.*

*Département de chimie, Université de Sherbrooke,  
2500 Boul. Université, Sherbrooke, QC, J1K 2R1*

[Eli.Zysman-Colman@usherbrooke.ca](mailto:Eli.Zysman-Colman@usherbrooke.ca)

## **SUPPORTING INFORMATION**

| <b><u>Table of Contents:</u></b>                                            | <b><u>Pages</u></b> |
|-----------------------------------------------------------------------------|---------------------|
| <b>Crystallographic data</b>                                                | <b>S2-3</b>         |
| <b>Example time-resolved excited-state lifetime measurements</b>            | <b>S4</b>           |
| <b>Absorption and emission spectra of individual complexes</b>              | <b>S5-8</b>         |
| <b>Comparison of calculated and experimental absorption spectra</b>         | <b>S9-10</b>        |
| <b>Jablonski diagram for individual complexes</b>                           | <b>S11-14</b>       |
| <b>Cyclic voltammetry general section</b>                                   | <b>S15</b>          |
| <b>individual curves</b>                                                    | <b>S15-S17</b>      |
| <b><sup>1</sup>H and <sup>13</sup>C NMR spectra of individual complexes</b> | <b>S18-S25</b>      |
| <b>Visualisation of MOs of individual complexes</b>                         | <b>S26-S33</b>      |
| <b>Energy and composition of TD-DFT calculated transitions</b>              | <b>S34-S51</b>      |

**Table S1:** Crystallographic data for complexes **2a**, **3b** and **4a**

|                                   | 2a                                                        | 3b                                                        | 4a                                                        |
|-----------------------------------|-----------------------------------------------------------|-----------------------------------------------------------|-----------------------------------------------------------|
| Identification code               | sI03169fI                                                 | sI06191fI                                                 | sI03169fI                                                 |
| Empirical formula                 | C40 H32 F6 Ir N8 P                                        | C43 H41 Cl3 F10 Ir N4 P                                   | C41 H30 Cl2 F10 Ir N8 P                                   |
| Formula weight                    | 961.91                                                    | 1133.32                                                   | 1118.8                                                    |
| Temperature                       | 293(2) K                                                  | 293(2) K                                                  | 198(2) K                                                  |
| Wavelength                        | 1.54176 Å                                                 | 1.54176 Å                                                 | 0.71073 Å                                                 |
| Crystal system                    | Monoclinic                                                | Monoclinic                                                | Monoclinic                                                |
| Space group                       | P21/c                                                     | P21/n                                                     | P21/C                                                     |
| Unit cell dimensions              | a = 15.837(4) Å<br>b = 15.516(4) Å<br>c = 18.061(4) Å     | a = 12.106(8) Å<br>b = 24.022(14) Å<br>c = 15.686(11) Å   | a = 15.248(7) Å<br>b = 16.489(7) Å<br>c = 18.317(7) Å     |
|                                   | α = 90°.<br>β = 115.297(19)°.<br>γ = 90°.                 | α = 90°.<br>β = 94.88(6)°.<br>γ = 90°.                    | α = 90°.<br>β = 111.89(4)°.<br>γ = 90°.                   |
| Volume                            | 4012.6(17) Å <sup>3</sup>                                 | 4545(5) Å <sup>3</sup>                                    | 4273(3) Å <sup>3</sup>                                    |
| Z                                 | 4                                                         | 4                                                         | 4                                                         |
| Density (calculated)              | 1.592 Mg/m <sup>3</sup>                                   | 1.656 Mg/m <sup>3</sup>                                   | 1.739 Mg/m <sup>3</sup>                                   |
| Absorption coefficient            | 7.404 mm <sup>-1</sup>                                    | 8.322 mm <sup>-1</sup>                                    | 3.373 mm <sup>-1</sup>                                    |
| F(000)                            | 1896                                                      | 2240                                                      | 2192                                                      |
| Crystal size                      | 0.30 x 0.20 x 0.05 mm <sup>3</sup>                        | 0.7 x 0.3 x 0.2 mm <sup>3</sup>                           | 0.50 x 0.30 x 0.20 mm <sup>3</sup>                        |
| Theta range for data collection   | 3.93 to 70.04°.                                           | 3.37 to 70.02°.                                           | 1.44 to 25.55°.                                           |
| Index ranges                      | -19<= <i>h</i> <=17, 0<= <i>k</i> <=18, 0<= <i>l</i> <=22 | -14<= <i>h</i> <=14, 0<= <i>k</i> <=29, 0<= <i>l</i> <=19 | -18<= <i>h</i> <=17, 0<= <i>k</i> <=20, 0<= <i>l</i> <=22 |
| Reflections collected             | 7448                                                      | 8192                                                      | 7685                                                      |
| Independent reflections           | 7448 [R(int) = 0.0000]                                    | 8192 [R(int) = 0.0000]                                    | 7685 [R(int) = 0.0000]                                    |
| Completeness to theta = 25.03°    | 98.10%                                                    | 95.00%                                                    | 96.10%                                                    |
| Absorption correction             | Psi-Scan                                                  | Psi-Scan                                                  | Psi-Scan                                                  |
| Max. and min. transmission        | 0.7085 and 0.2148                                         | 0.19 and 0.10                                             | 0.5519 and 0.2834                                         |
| Refinement method                 | Full-matrix least-squares on F <sup>2</sup>               | Full-matrix least-squares on F <sup>2</sup>               | Full-matrix least-squares on F <sup>2</sup>               |
| Data / restraints / parameters    | 7448 / 54 / 483                                           | 8192 / 1 / 542                                            | 7685 / 0 / 316                                            |
| Goodness-of-fit on F <sup>2</sup> | 0.942                                                     | 0.958                                                     | 0.86                                                      |
| Final R indices [I>2sigma(I)]     | R1 = 0.0850, wR2 = 0.1749                                 | R1 = 0.0950, wR2 = 0.2322                                 | R1 = 0.0848, wR2 = 0.1432                                 |
| R indices (all data)              | R1 = 0.2207, wR2 = 0.2222                                 | R1 = 0.1509, wR2 = 0.2656                                 | R1 = 0.2464, wR2 = 0.1807                                 |
| Extinction coefficient            | 0.00138(11)                                               | 0.0025(2)                                                 |                                                           |
| Largest diff. peak and hole       | 1.103 and -1.904 e.Å <sup>-3</sup>                        | 1.904 and -1.577 e.Å <sup>-3</sup>                        | 1.855 and -2.210 e.Å <sup>-3</sup>                        |

**Figure S1:** Ortep representation of complex **2a** (ellipsoids at 30% probability)

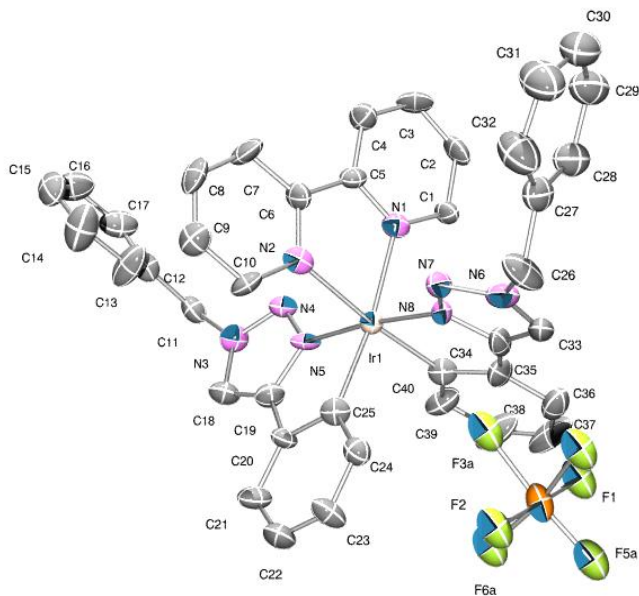

**Figure S2:** Ortep representation of complex **3b** (ellipsoids at 30% probability)

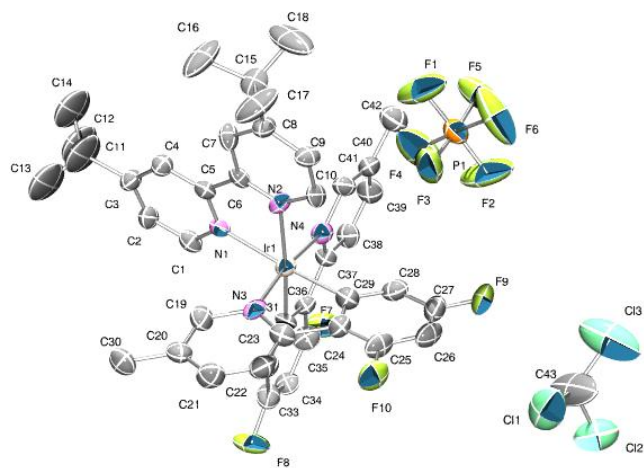

**Figure S3:** Ortep representation of complex **4a** (ellipsoids at 30% probability)

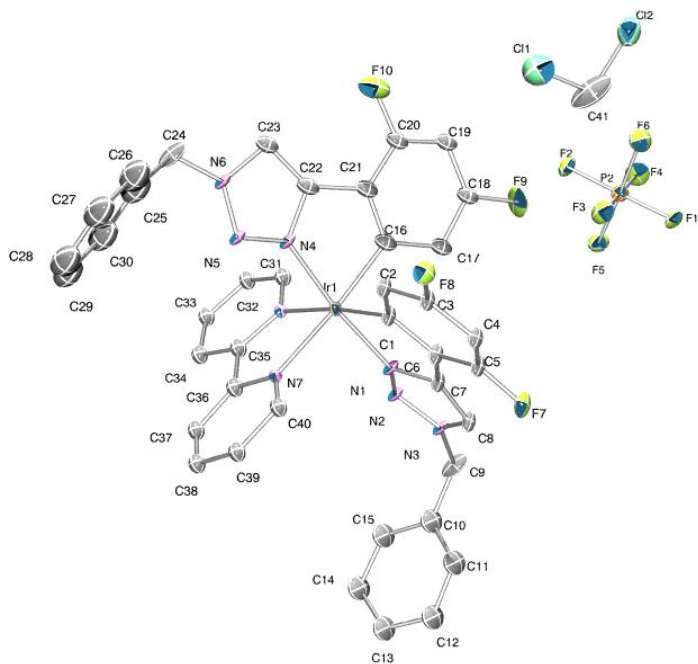

**Figures S4:** Example of the lifetime measurement of a sample of **3a** [Ir(dFMeppy)<sub>2</sub>bpy]PF<sub>6</sub> in MeOH/EtOH at 77 K. The decay curve is in red and the standard deviation after modeling with a mono-exponential regression is in green.

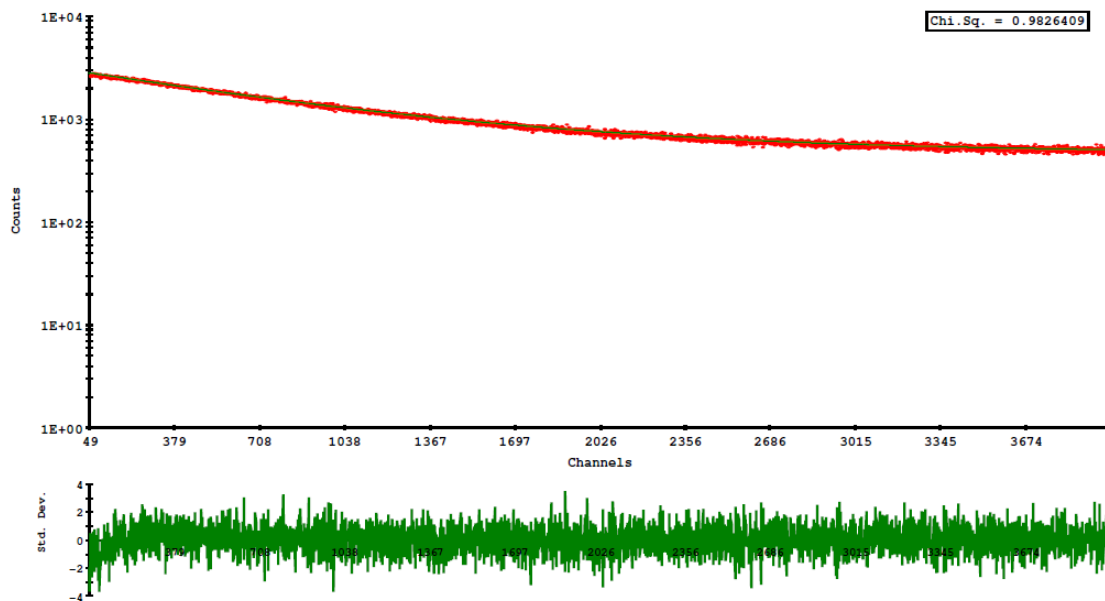

Calculated using 1 exponential

Prompt data : (none)  
Decay data : Decay

The initial paramters are:

Shift Value = Fixed @ 0 ch; 0 sec

T1 Estimate = 824.4095 ch; 5.790092E-06 sec

A Free  
B1 Free

Prompt and decay LO = 49 ch; 3.441427E-07 sec  
Prompt and decay HI = 4004 ch; 2.812137E-05 sec

Background on prompt = 0  
Time calibration = 7.02332E-09 sec/ch

The fitted parameters are:

SHIFT = 0 ch

T1 = 933.9063 ch; 6.559123E-06 sec S.Dev = 1.524536E-08 sec  
A = 474.9897 S.Dev = 0.5658206  
B1 = 2372.941 [ 100.00 Rel.Ampl] S.Dev = 2.503846  
CHISQ = 0.9826409 [ 3953 degrees of freedom ]

Chi-squared Probability = 77.89504 percent  
Durbin-Watson Parameter = 1.952557  
Negative residuals = 49.14054 percent  
Residuals < 1 s.dev = 67.77048 percent  
Residuals < 2 s.dev = 95.8544 percent  
Residuals < 3 s.dev = 99.67139 percent  
Residuals < 4 s.dev = 100 percent

**Figure S5:** Absorption and emission spectra for **1a** [Ir(ppy)<sub>2</sub>bpy]PF<sub>6</sub>:

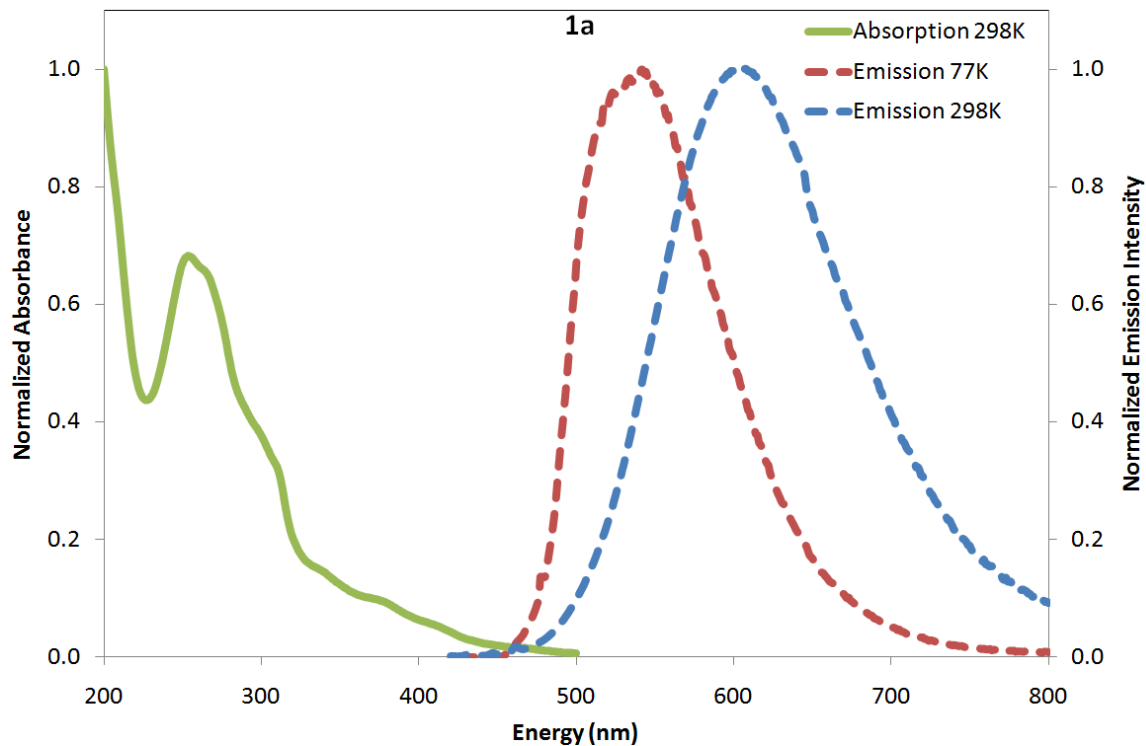

**Figure S6:** Absorption and emission spectra for **1b** [Ir(ppy)<sub>2</sub>dtBubpy]PF<sub>6</sub>:

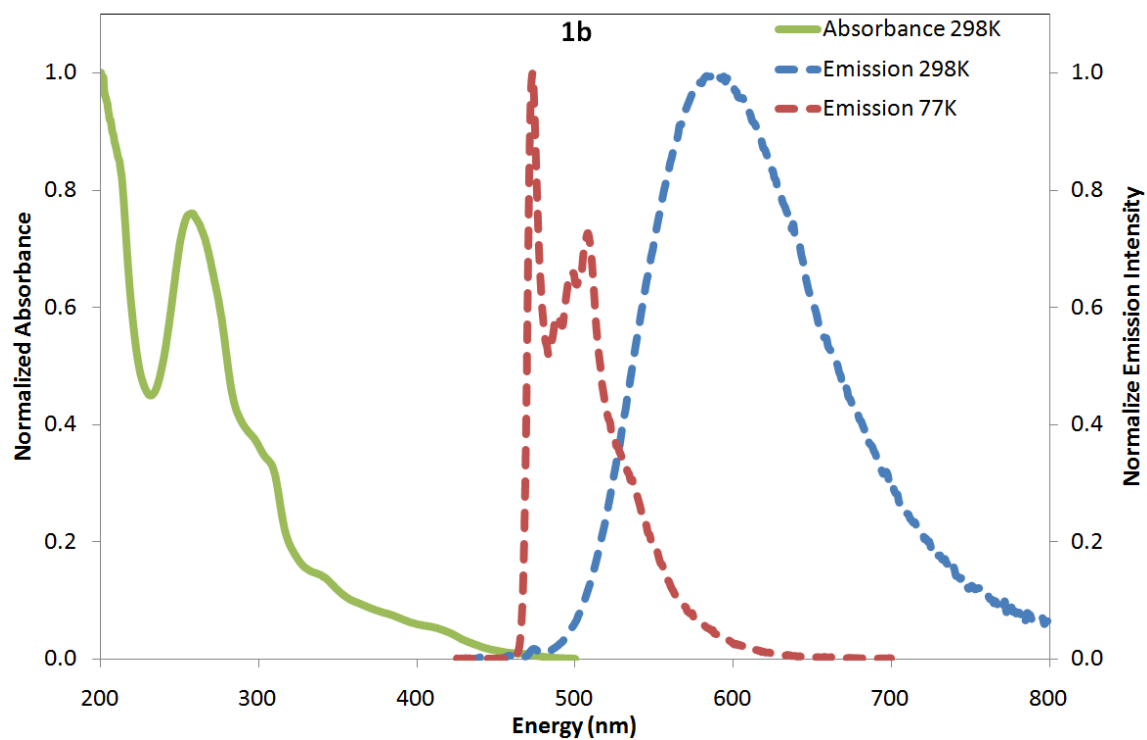

**Figure S7:** Absorption and emission spectra for **2a** [Ir(phtl)<sub>2</sub>bpy]PF<sub>6</sub>:

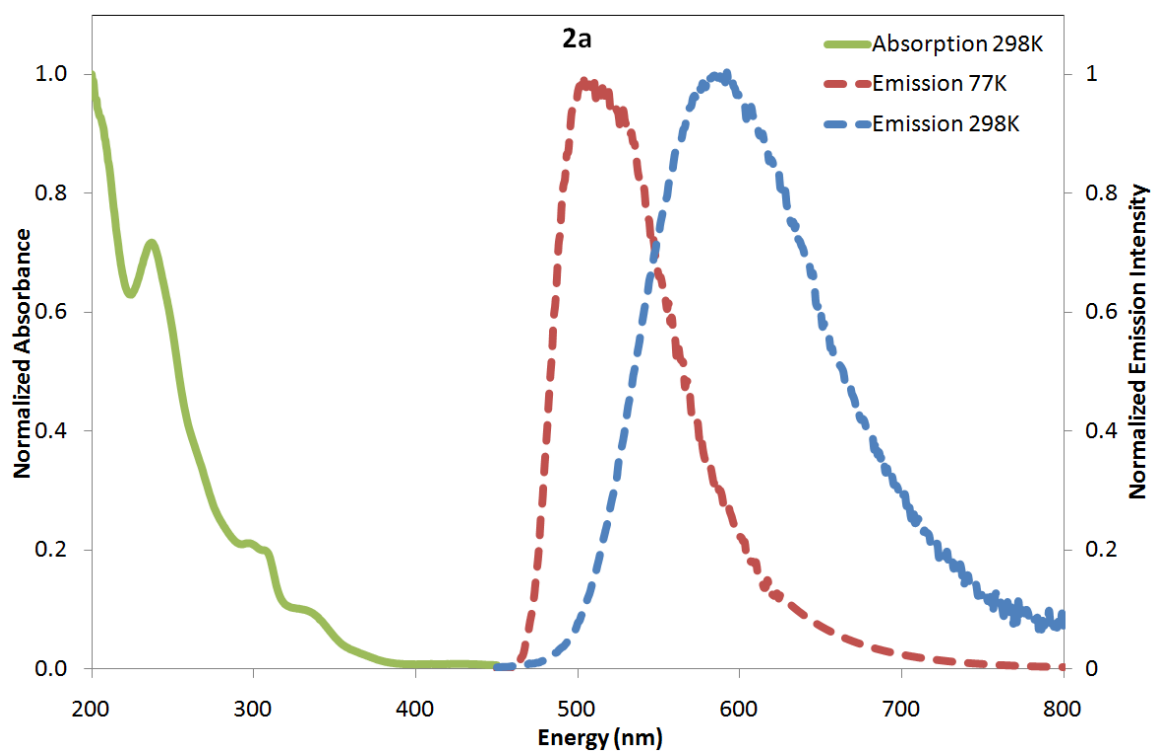

**Figure S8:** Absorption and emission spectra for **2b** [Ir(phtl)<sub>2</sub>dtBubpy]PF<sub>6</sub>:

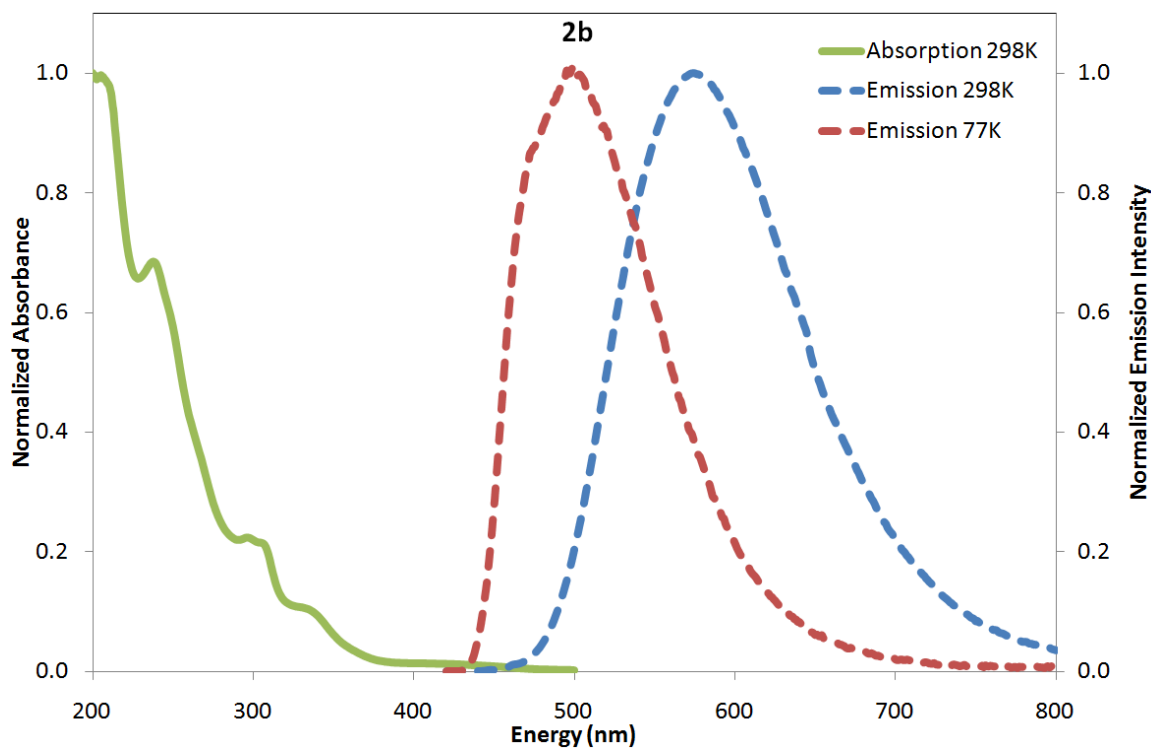

**Figure S9:** Absorption and emission spectra for **3a** [Ir(dFMeppy)<sub>2</sub>bpy]PF<sub>6</sub>:

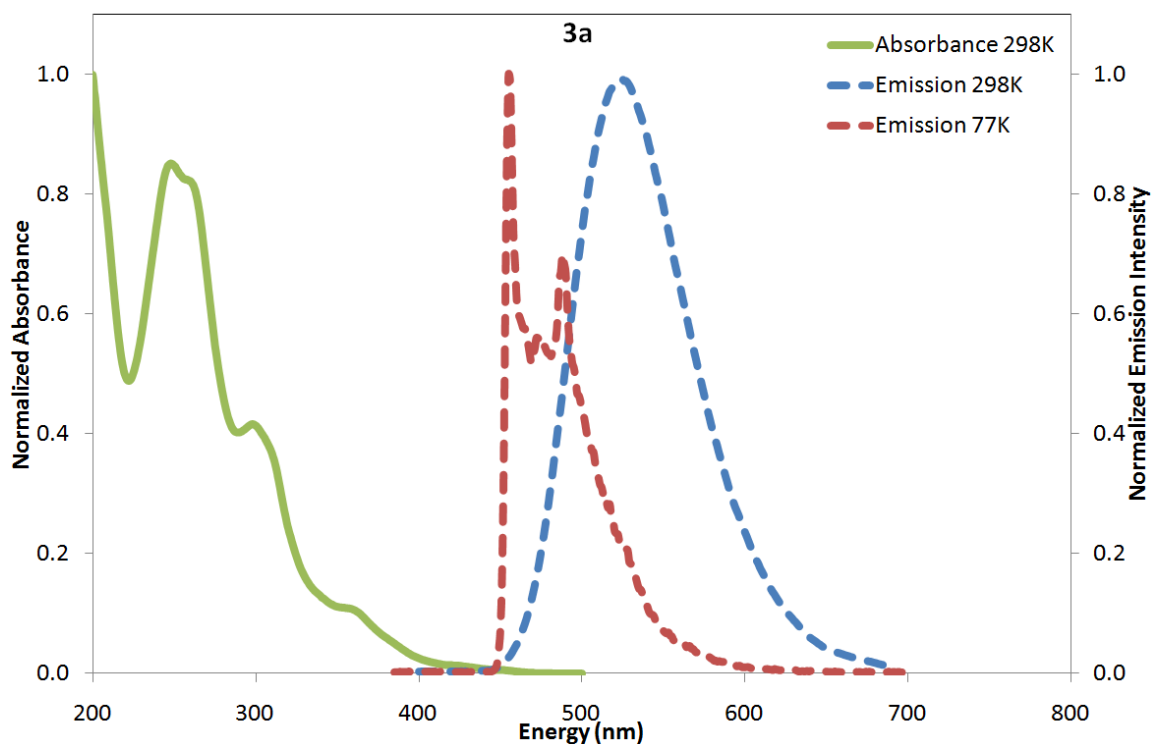

**Figure S10:** Absorption and emission spectra for **3b** [Ir(dFMeppy)<sub>2</sub>dtBubpy]PF<sub>6</sub>:

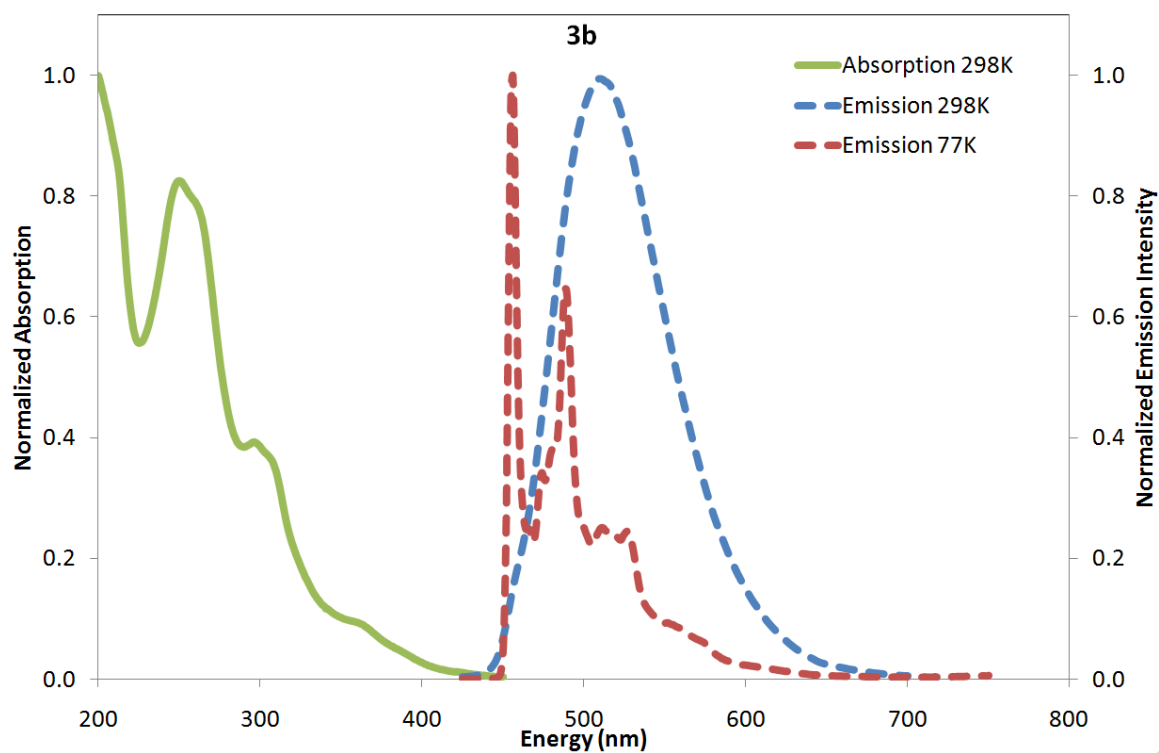

**Figure S11:** Absorption and emission spectra for **4a** [Ir(dFphtl)<sub>2</sub>bpy]PF<sub>6</sub>:

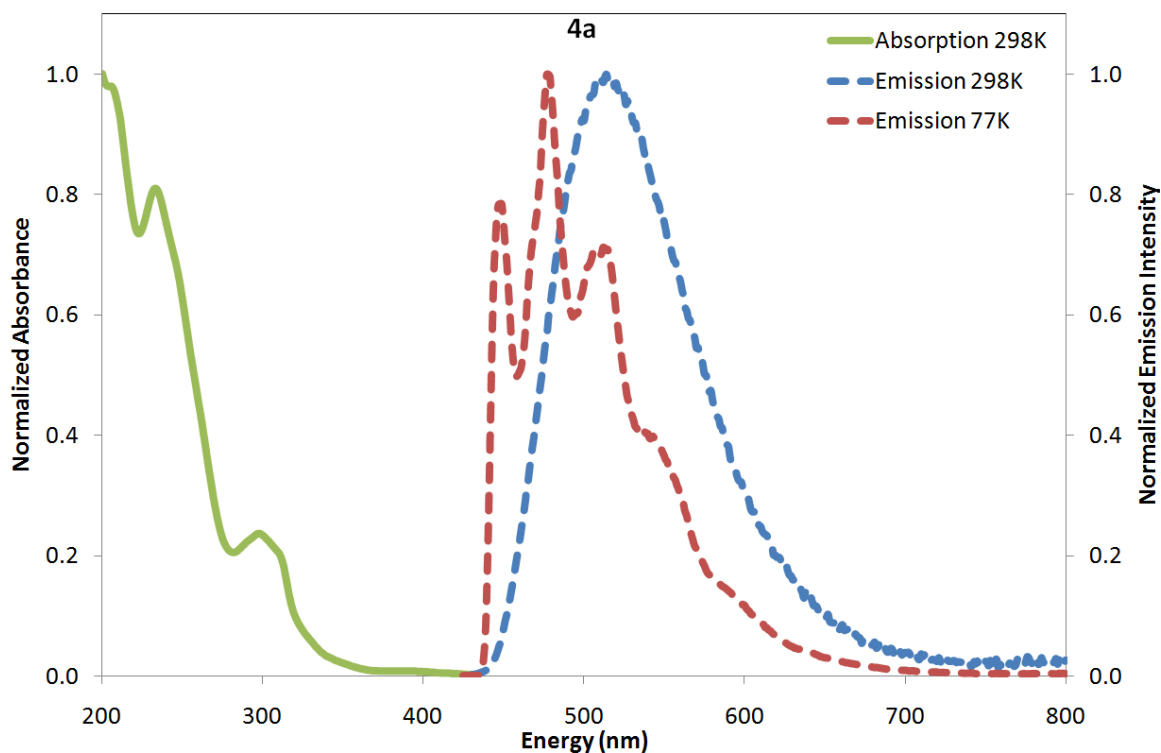

**Figure S12 :** Absorption and emission spectra for **4b** [Ir(dFphtl)<sub>2</sub>dtBubpy]PF<sub>6</sub>:

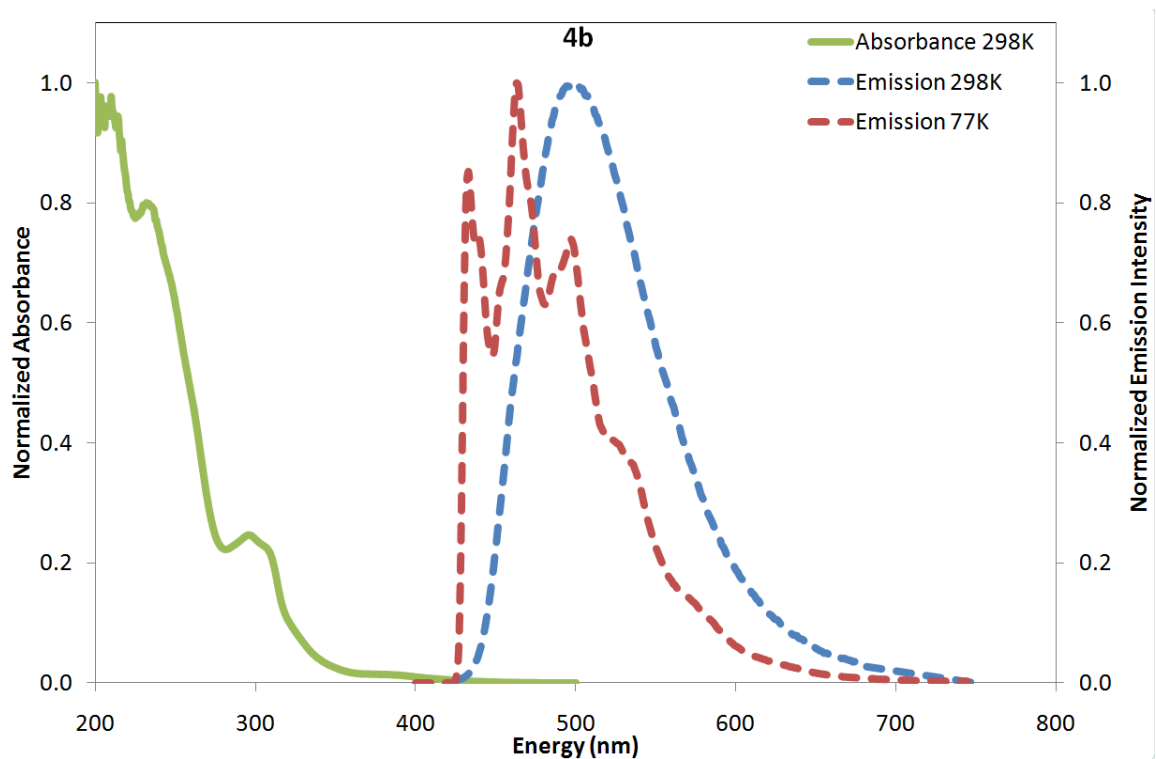



**Figure S13 :** Calculated and experimental absorption spectra of **1a**

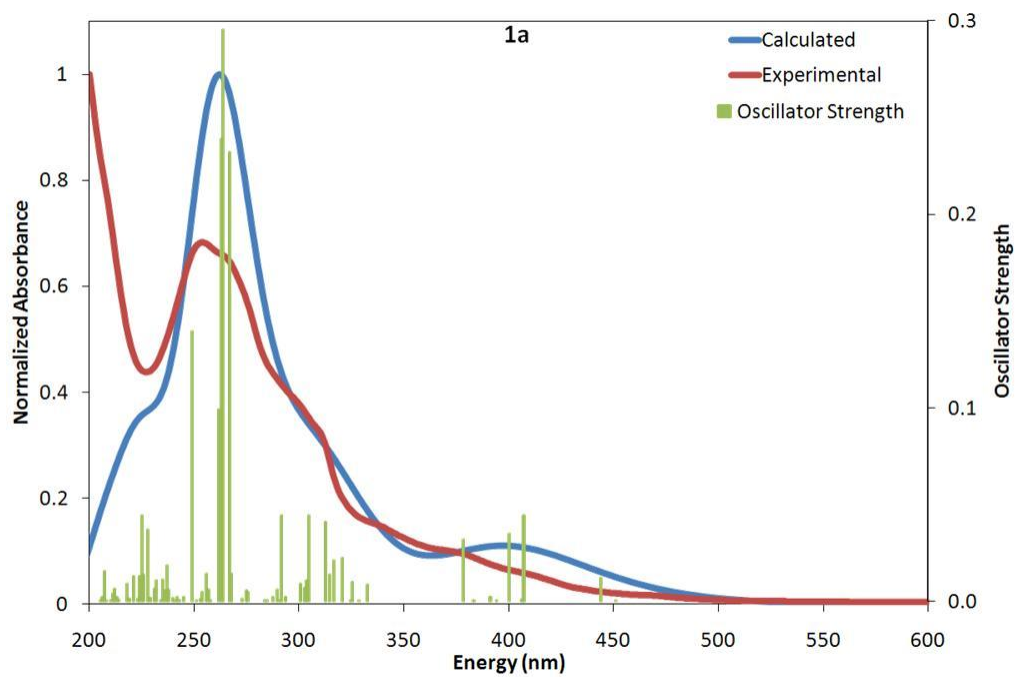

**Figure S14 :** Calculated and experimental absorption spectra of **1b**

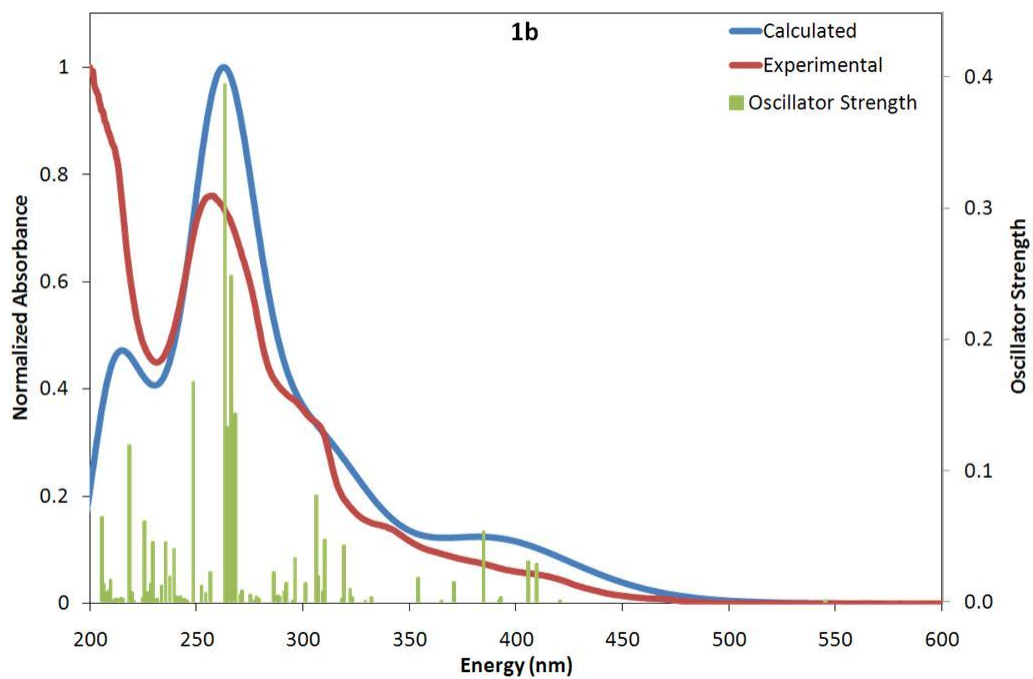

**Figure S15 :** Calculated and experimental absorption spectra of **3a**

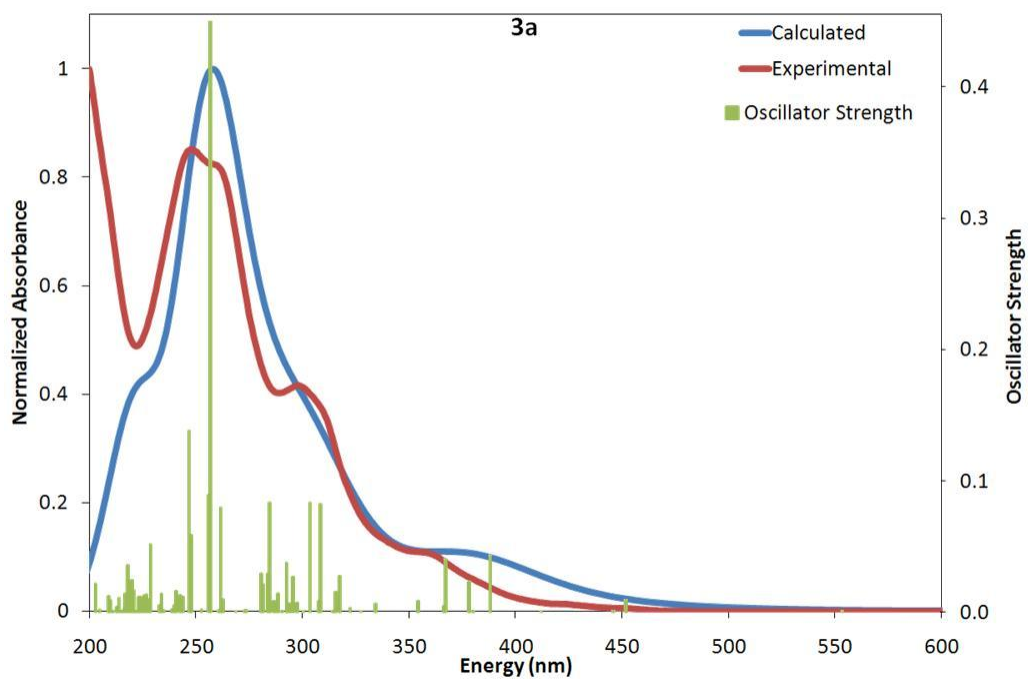

**Figure S16 :** Calculated and experimental absorption spectra of **3b**

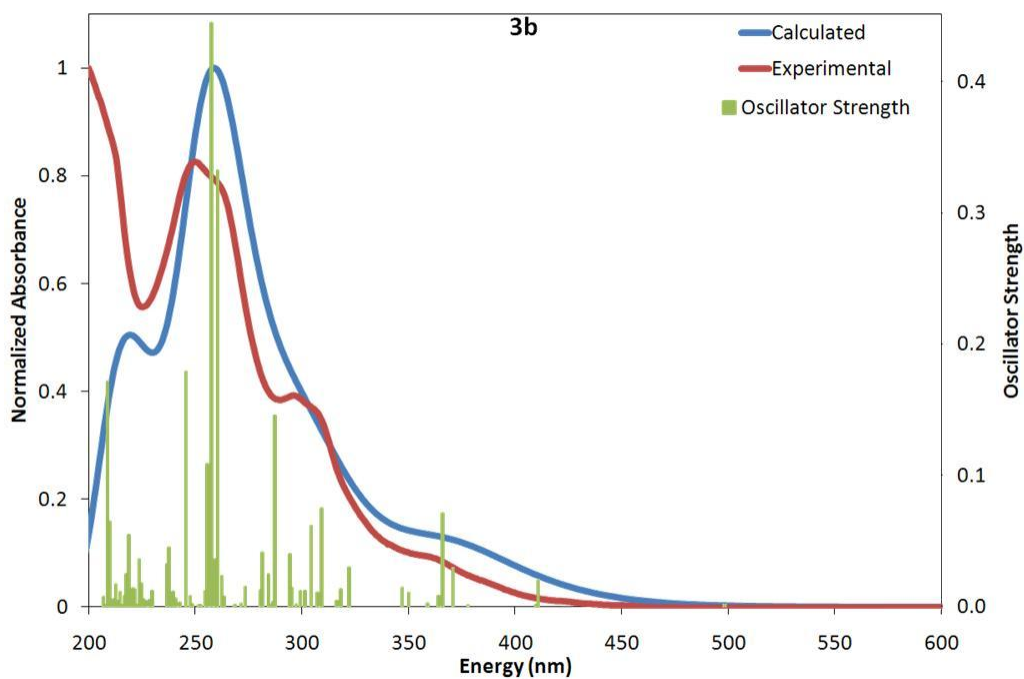

**Figure S17:** Jablonski diagram for complex **1a**

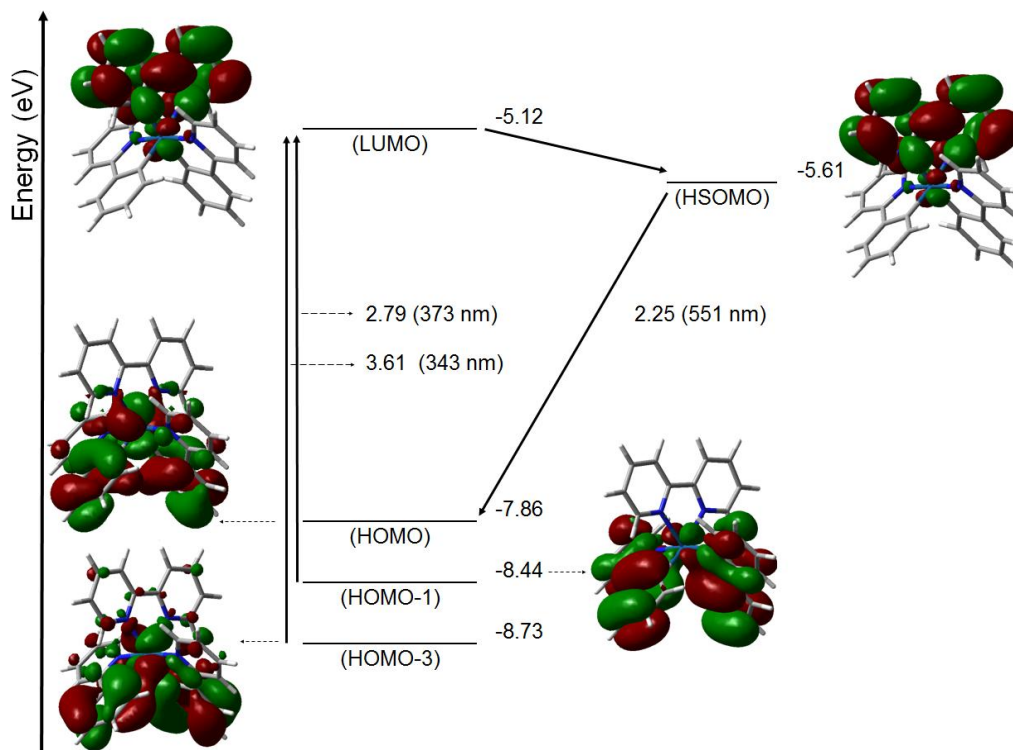

**Figure S18:** Jablonski diagram for complex **1b**

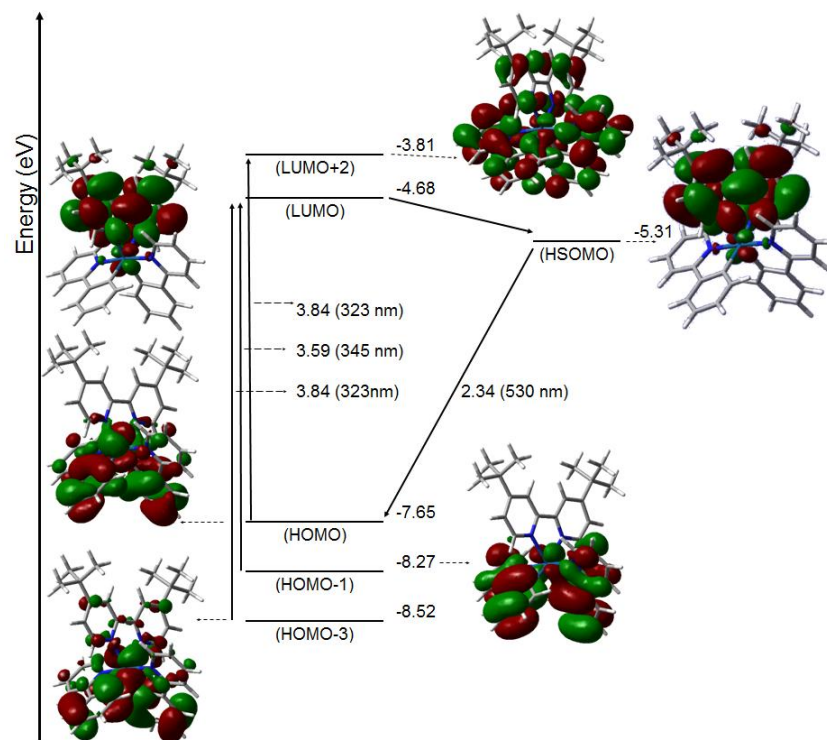

**Figure S19:** Jablonski diagram for complex **2a**

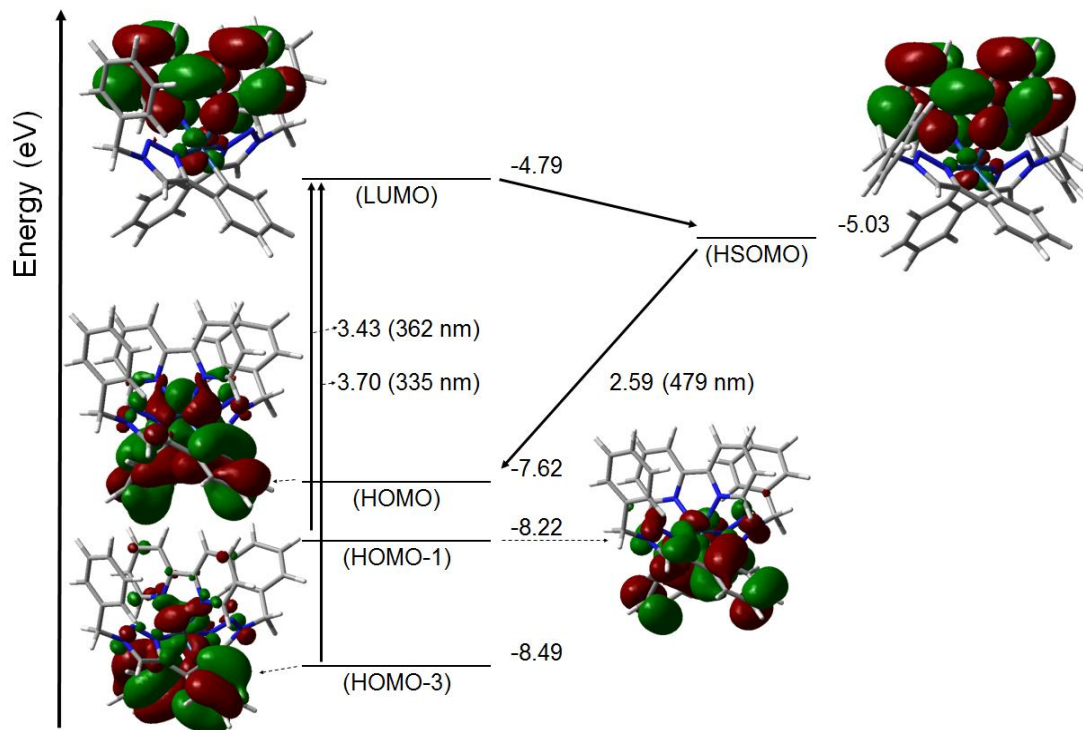

**Figure S20:** Jablonski diagram for complex **2b**

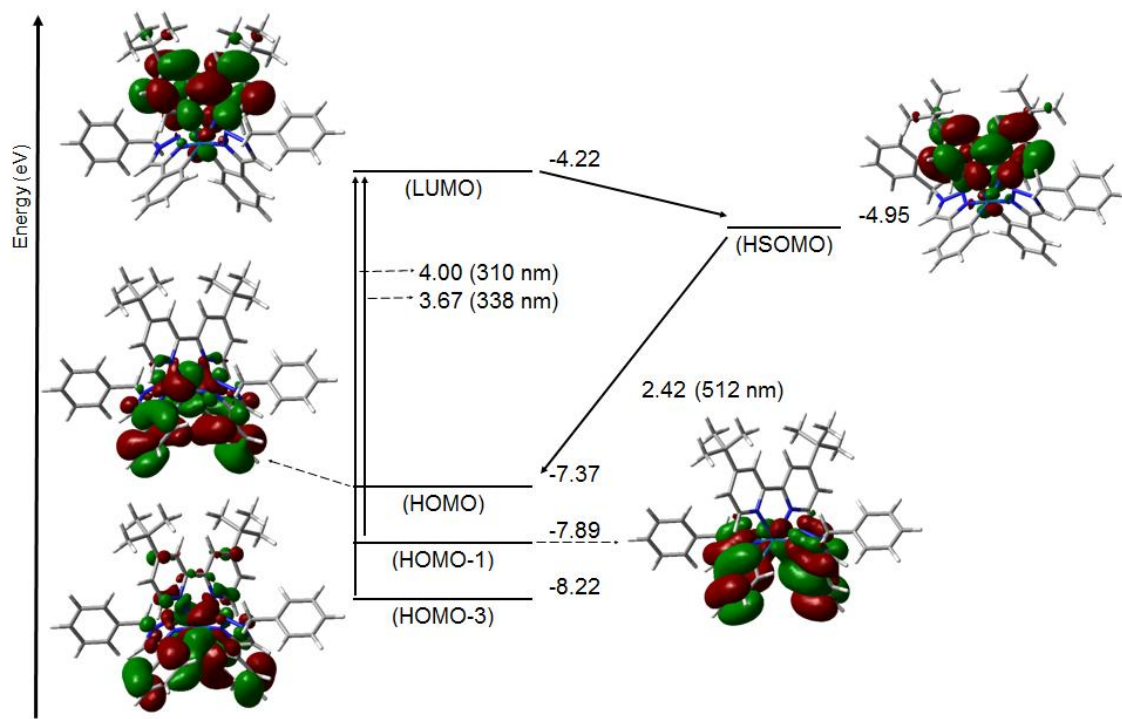

**Figure S21:** Jablonski diagram for complex **3a**

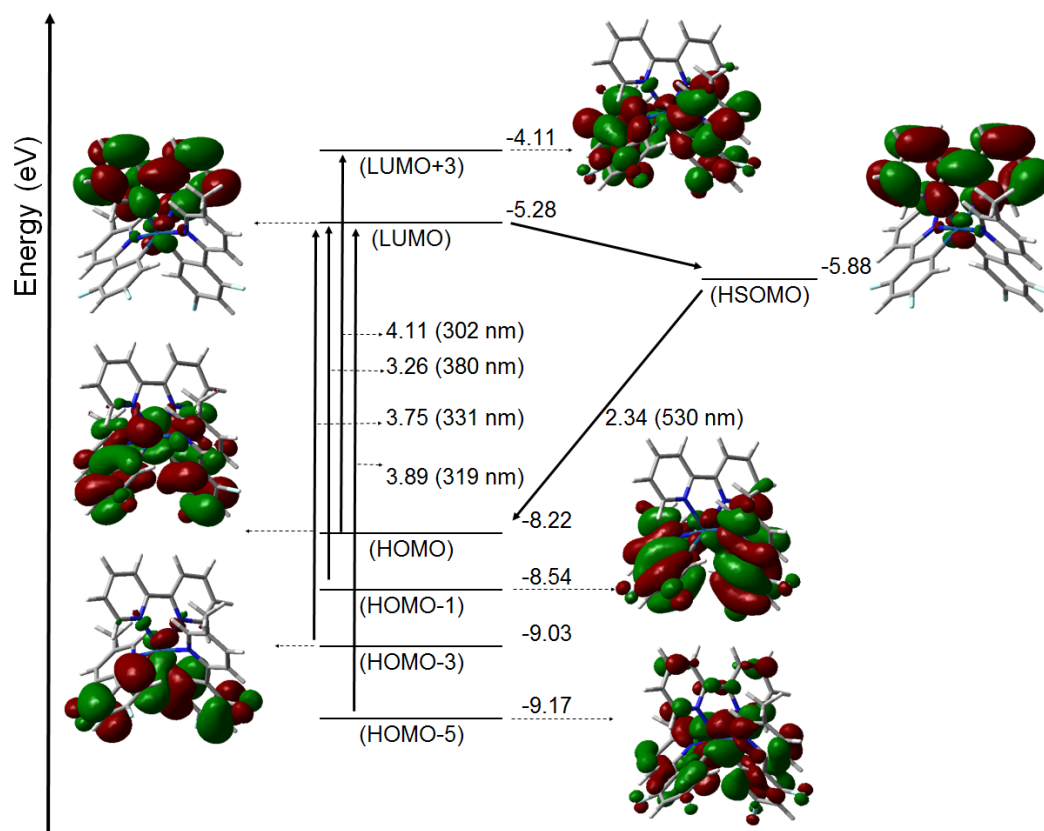

**Figure S22:** Jablonski diagram for complex **3b**

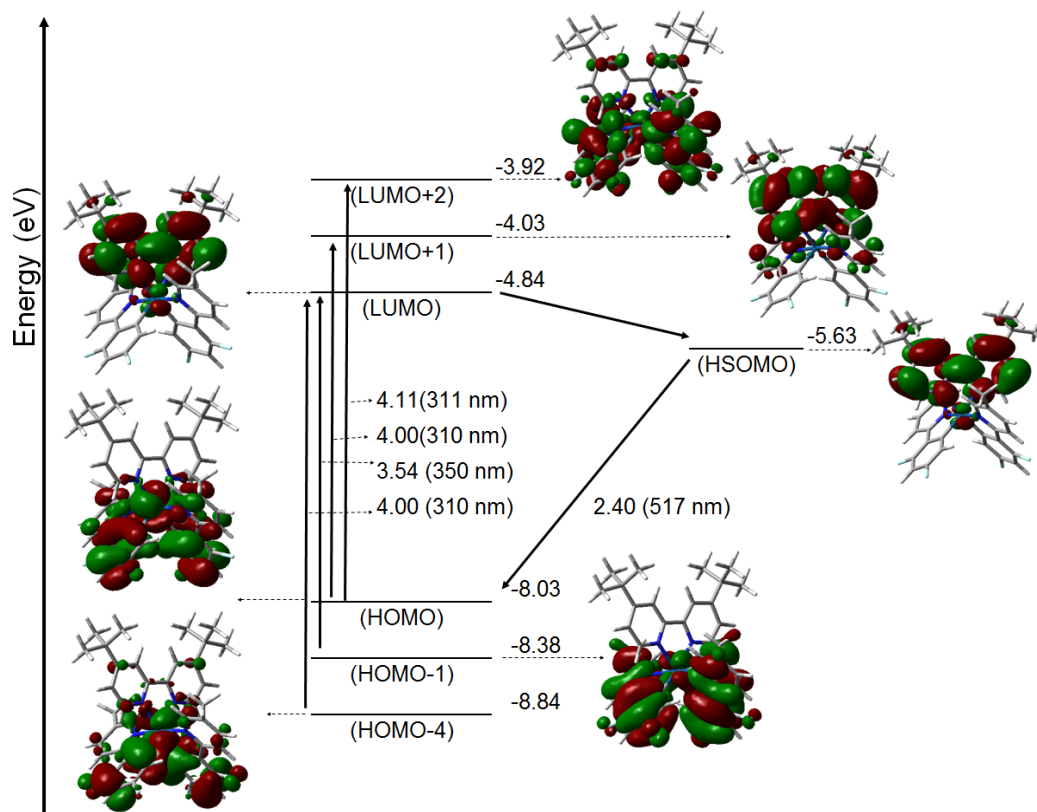



**Figure S23:** Jablonski diagram for complex **4a**

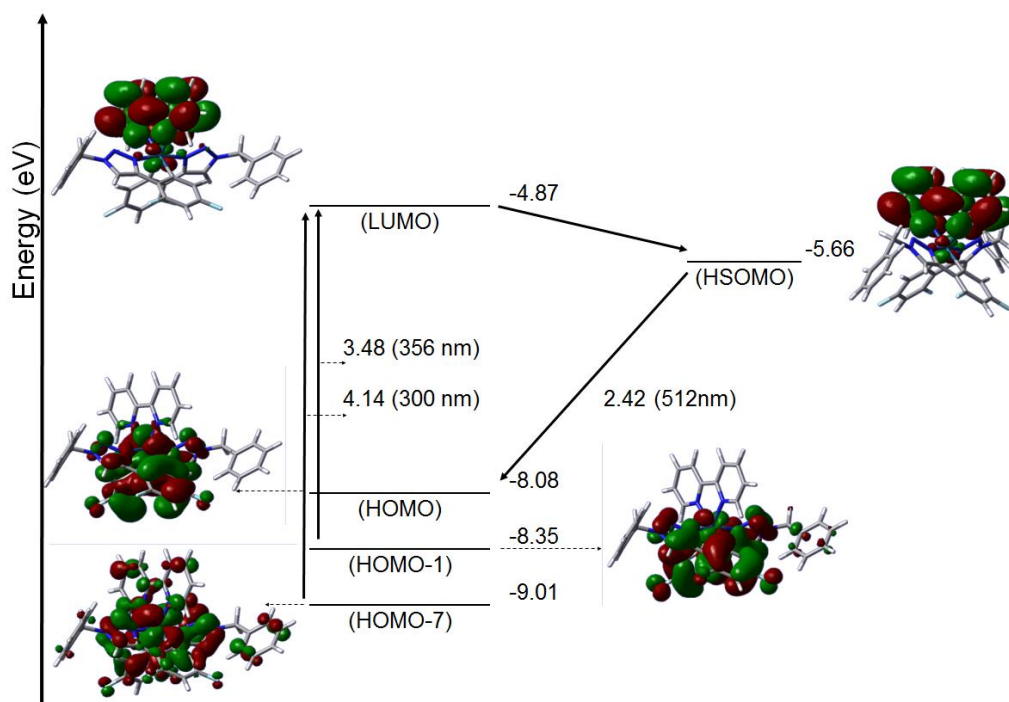

**Figure S24:** Jablonski diagram for complex **4b**

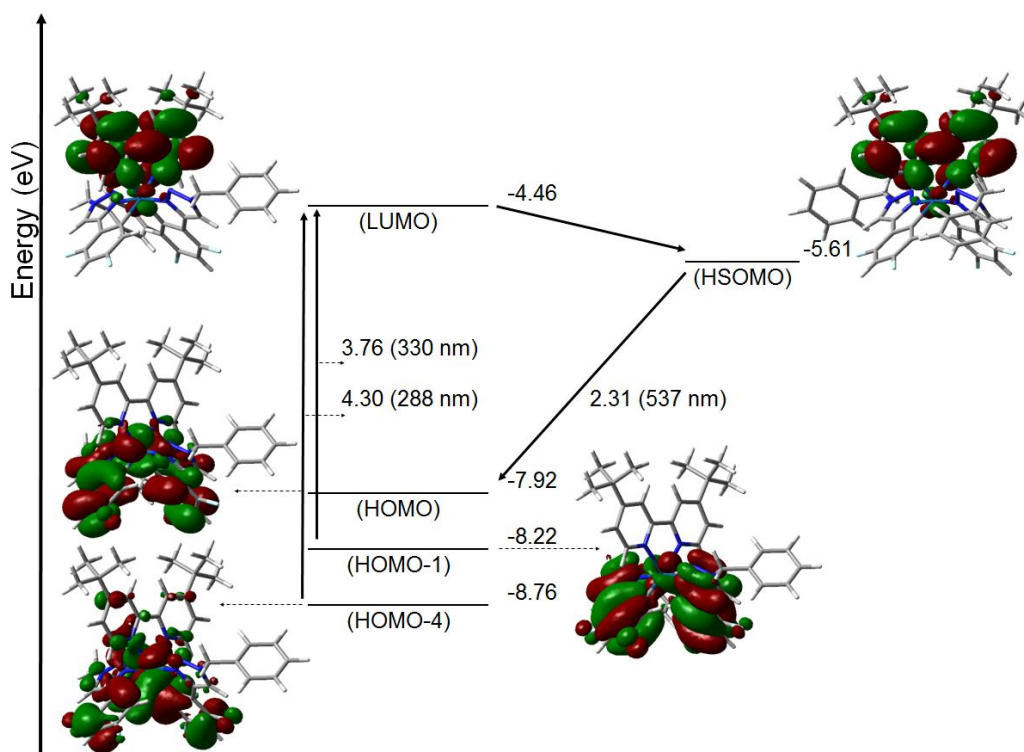

### **Cyclic voltammetry: General section**

All cyclic voltammograms shown below were measured in ACN (with ca. 0.1M TBAPF<sub>6</sub> as the supporting electrolyte) at a scan rate of 50 mV/sec. Potential windows of either -2 to 1.5 V or -2 V to 2 V were used during voltammogram acquisition. The reversibility and the potentials were found to be independent of the scan rate (from 50 to 200 mV/sec).

**Figure S25:** Cyclic voltammogram of complex **1a**

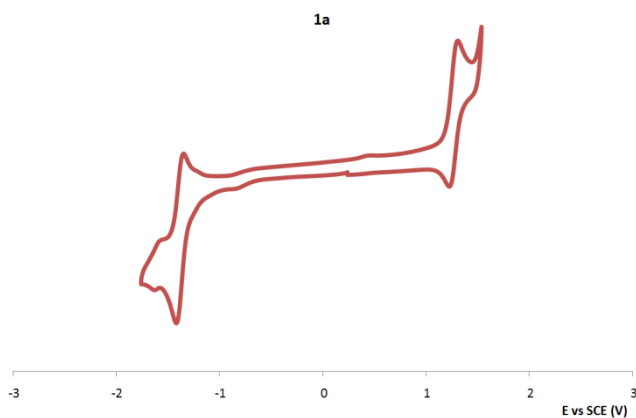

**Figure S26:** Cyclic voltammogram of complex **1b**

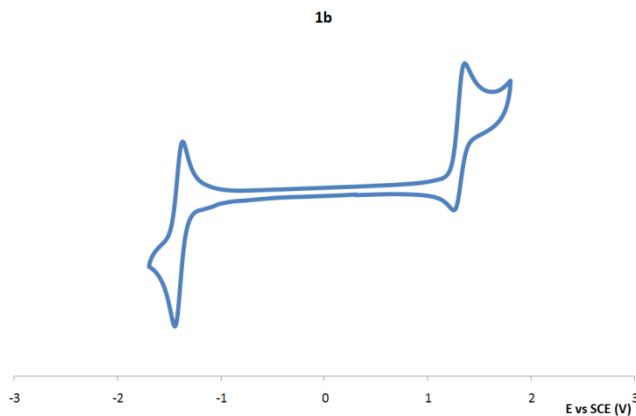

**Figure S27:** Cyclic v voltammogram of complex **2a**

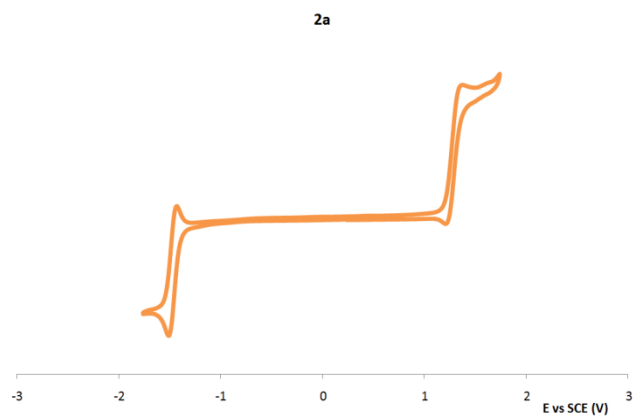

**Figure S28:** Cyclic voltammogram of complex **2b**

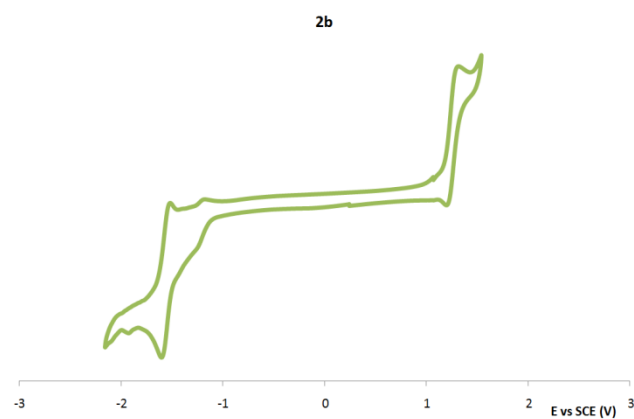

**Figure S29:** Cyclic voltammogram of complex **3a**

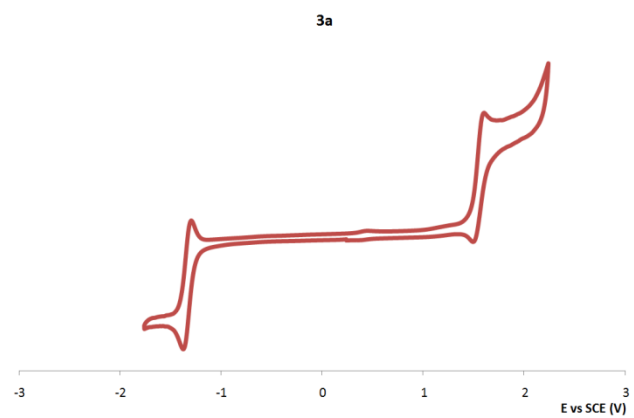



**Figure S30:** Cyclic voltammogram of complex **3b**

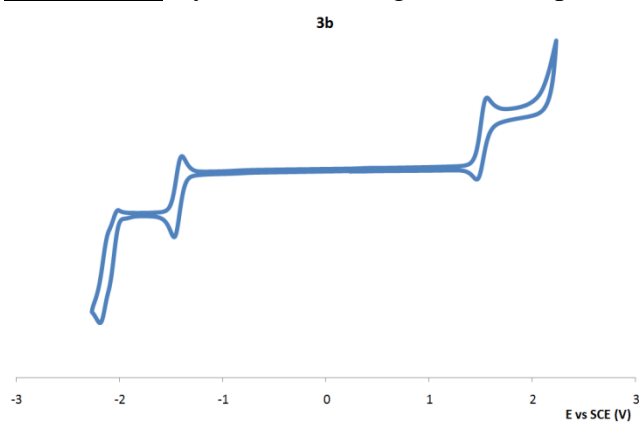

**Figure S31:** Cyclic voltammogram of complex **4a**

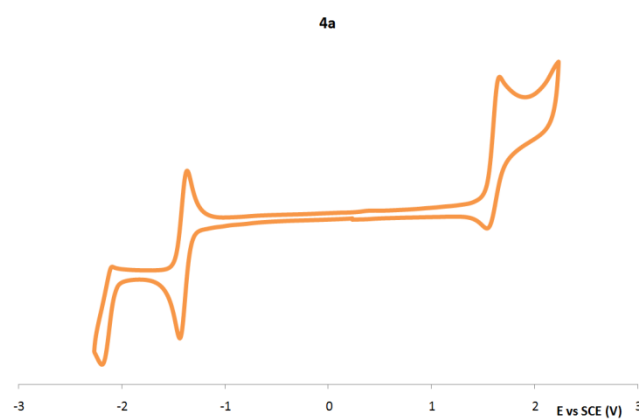

**Figure S32:** Cyclic voltammogram of complex **4b**

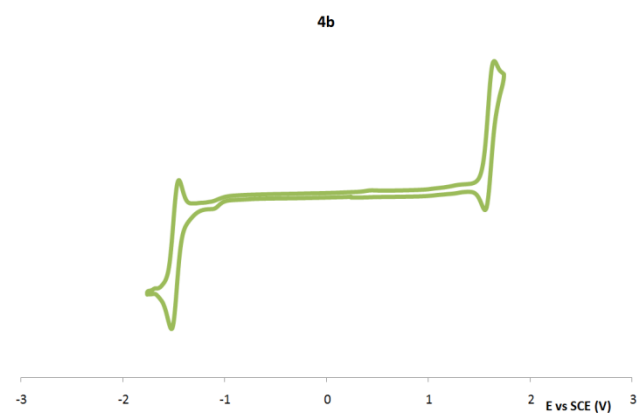

**Figure S 33:**  $^1\text{H}$  and  $^{13}\text{C}$  NMRs data of **1a**  $[\text{Ir}(\text{ppy})_2\text{bpy}]\text{PF}_6$

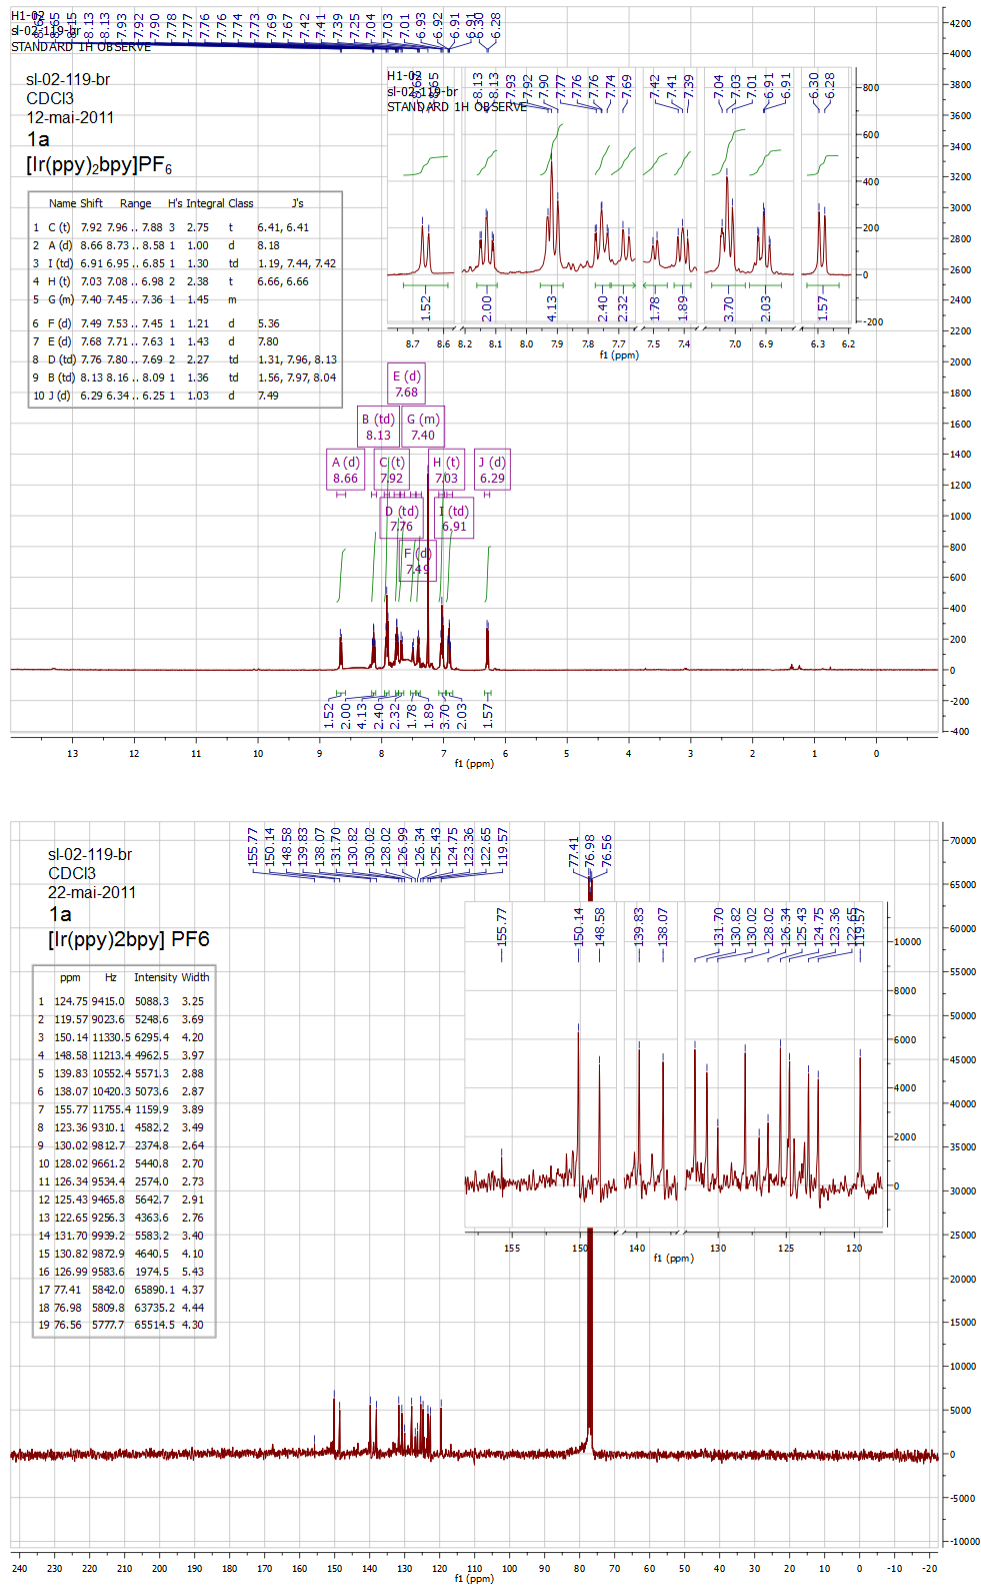

**Figure S 34:**  $^1\text{H}$  and  $^{13}\text{C}$  NMRs data of **1b**  $[\text{Ir}(\text{ppy})_2\text{di-}t\text{-Bu-bpy}]\text{PF}_6$

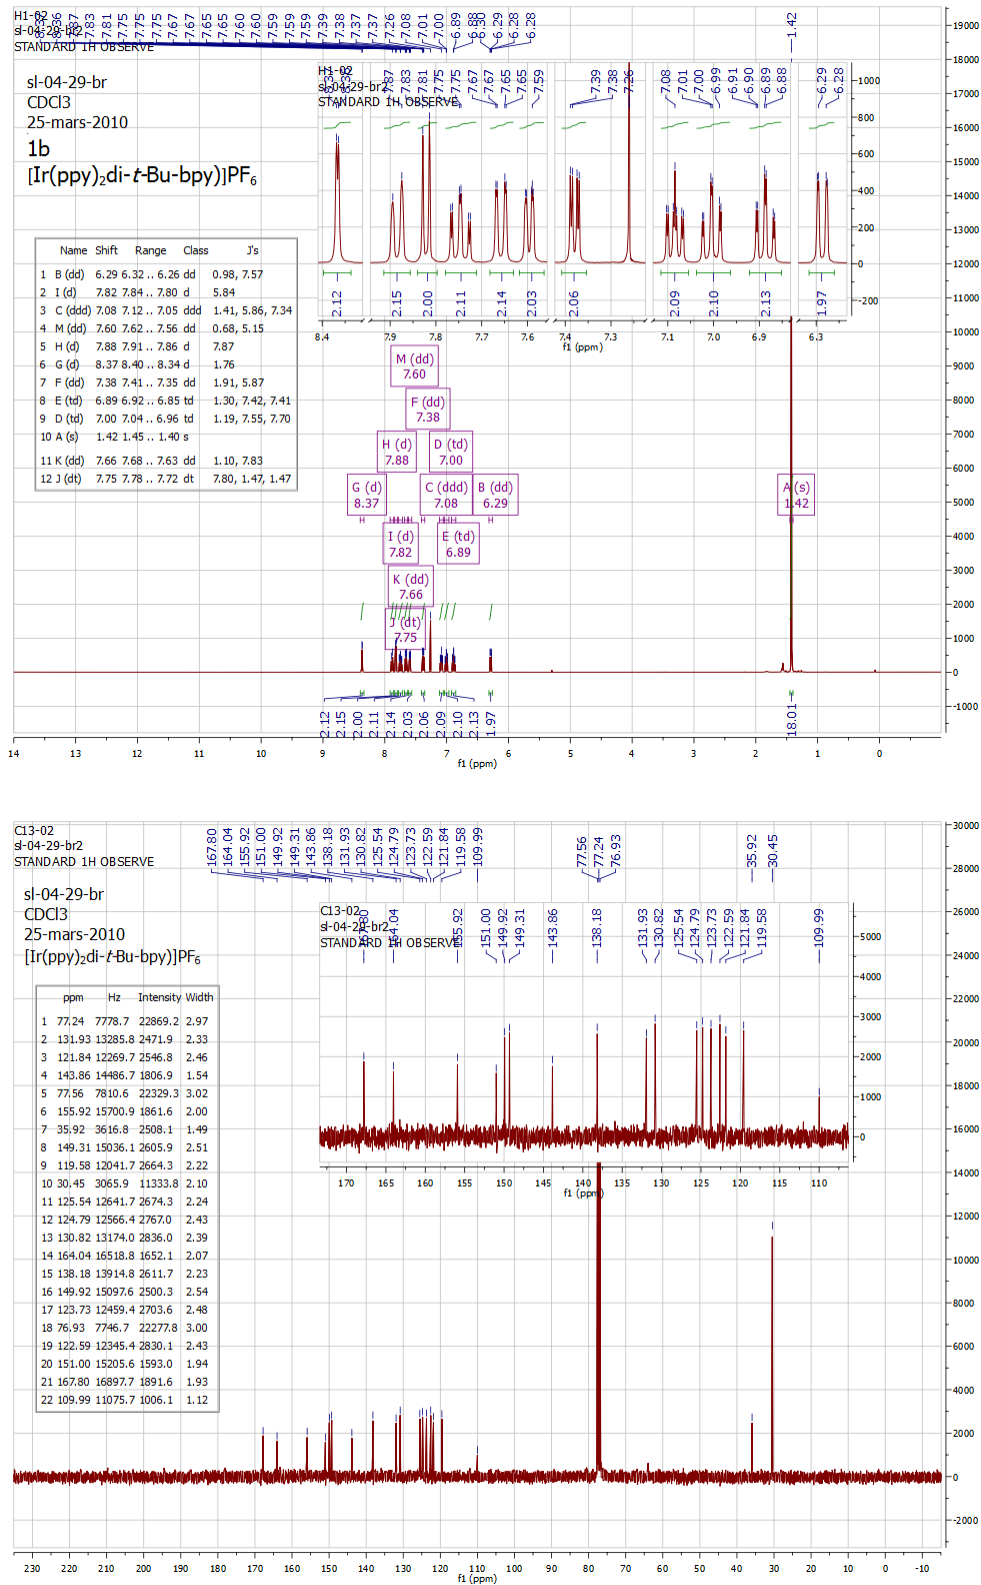

**Figure S 35:**  $^1\text{H}$  and  $^{13}\text{C}$  NMRs data of **2a**  $[\text{Ir}(\text{phtl})_2\text{bpy}]\text{PF}_6$

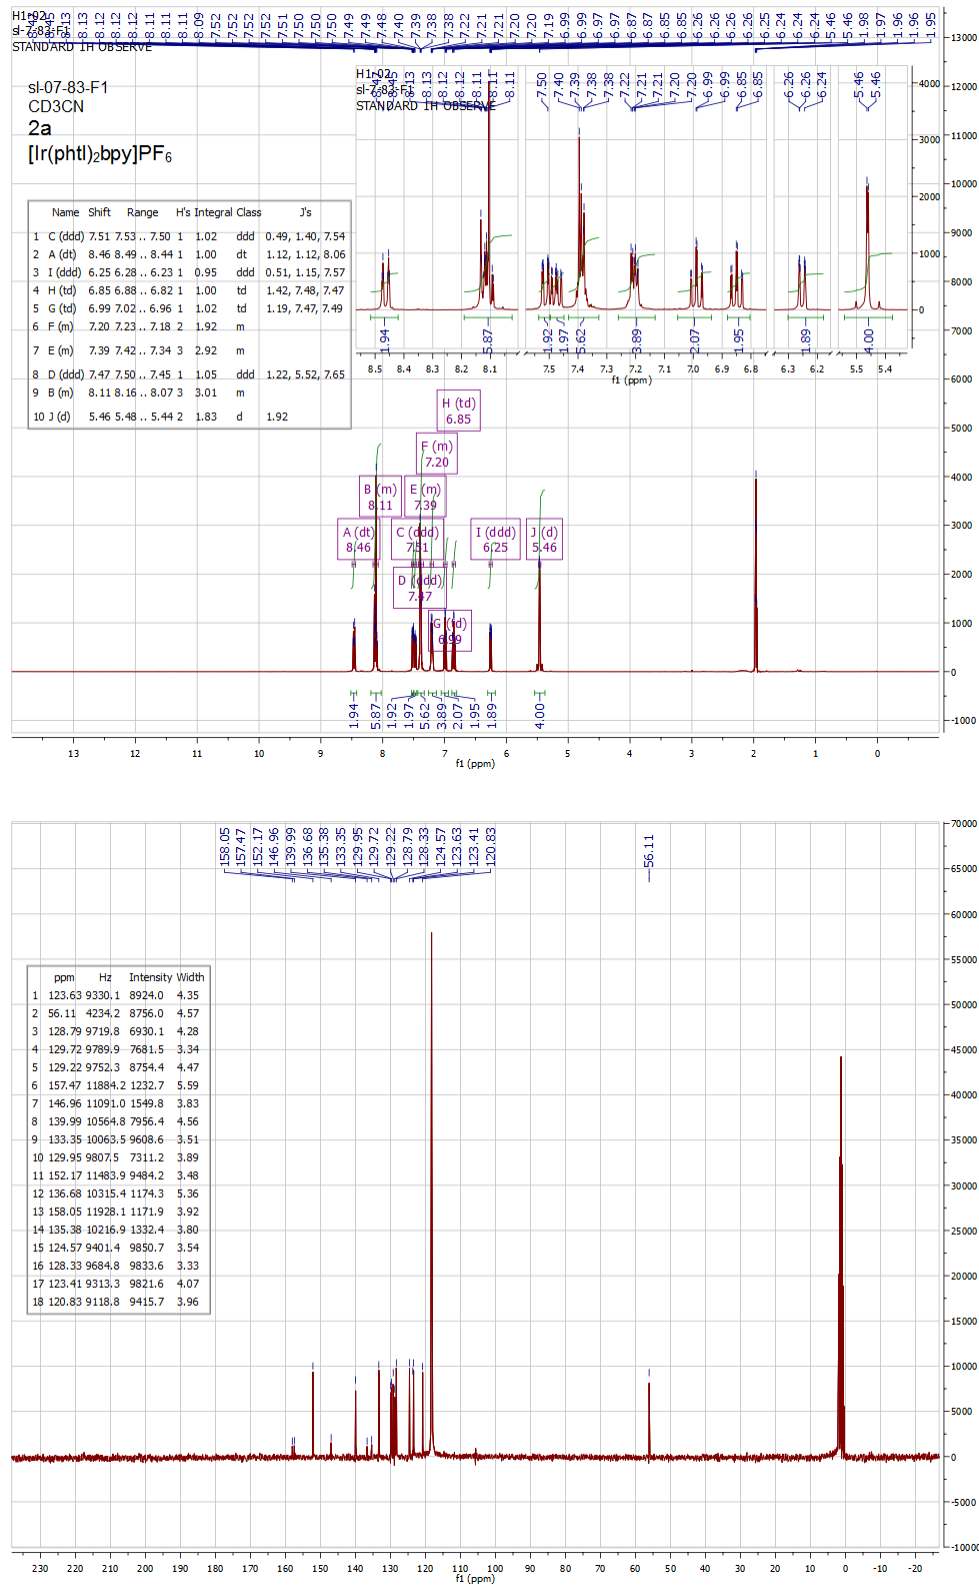

**Figure S 36:**  $^1\text{H}$  and  $^{13}\text{C}$  NMRs data of **2b**  $[\text{Ir}(\text{phtl})_2\text{dtBubpy}]\text{PF}_6$

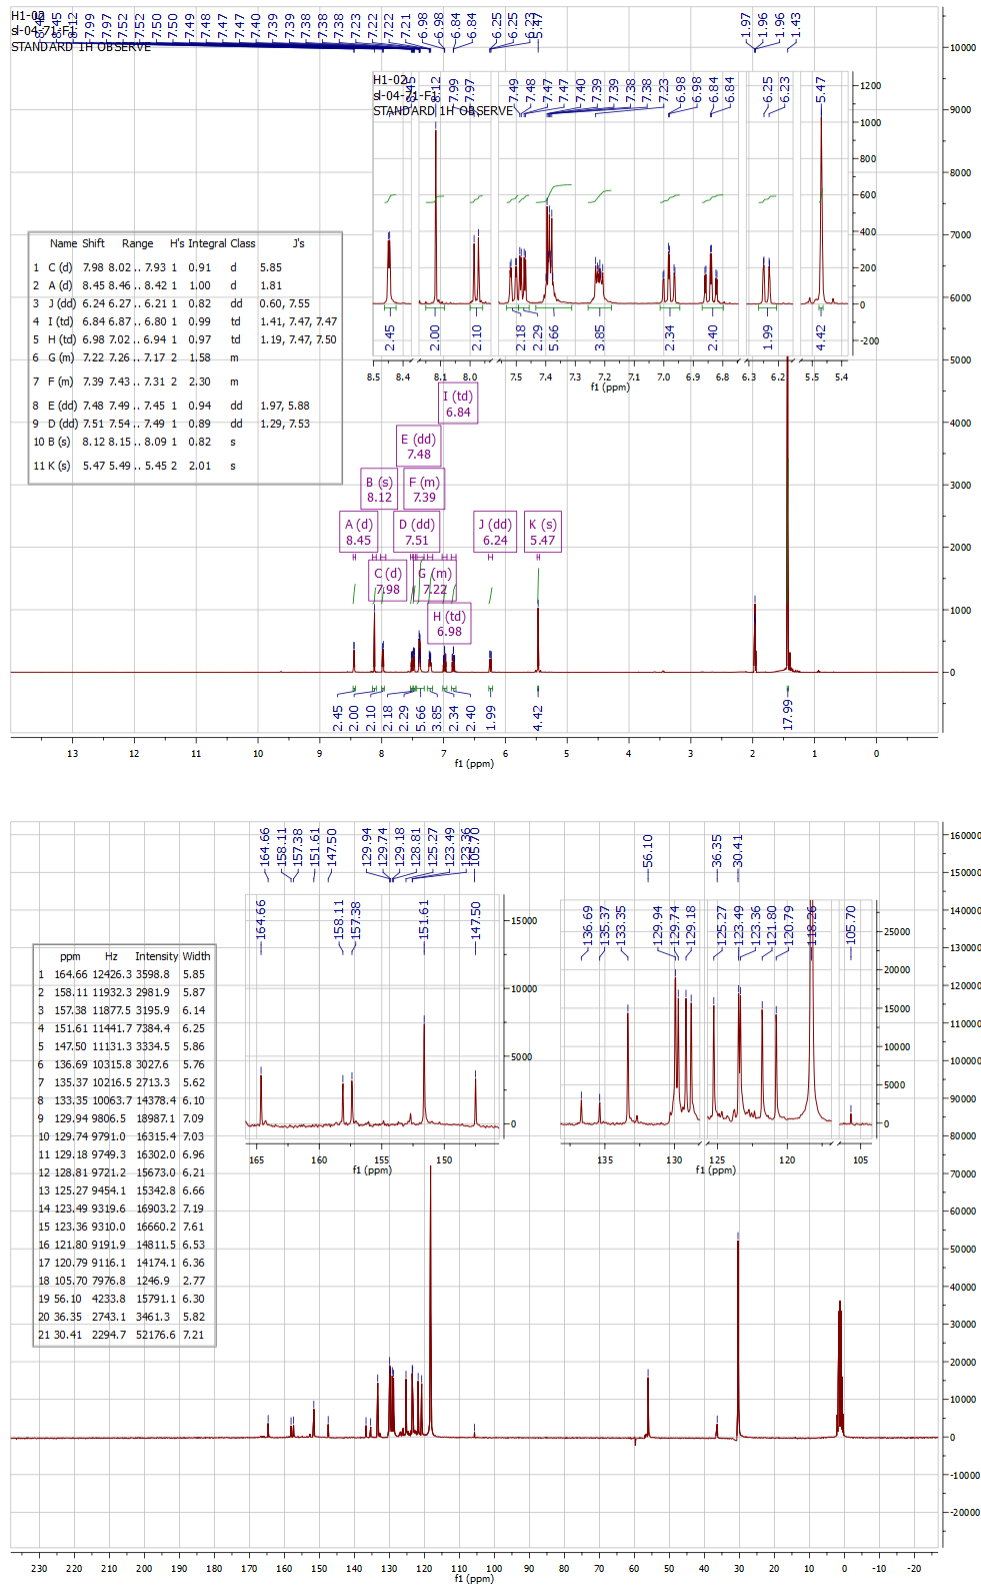

**Figure S 37:**  $^1\text{H}$  and  $^{13}\text{C}$  NMRs data of **3a**  $[\text{Ir}(\text{dFMeppy})_2\text{bpy}]\text{PF}_6$

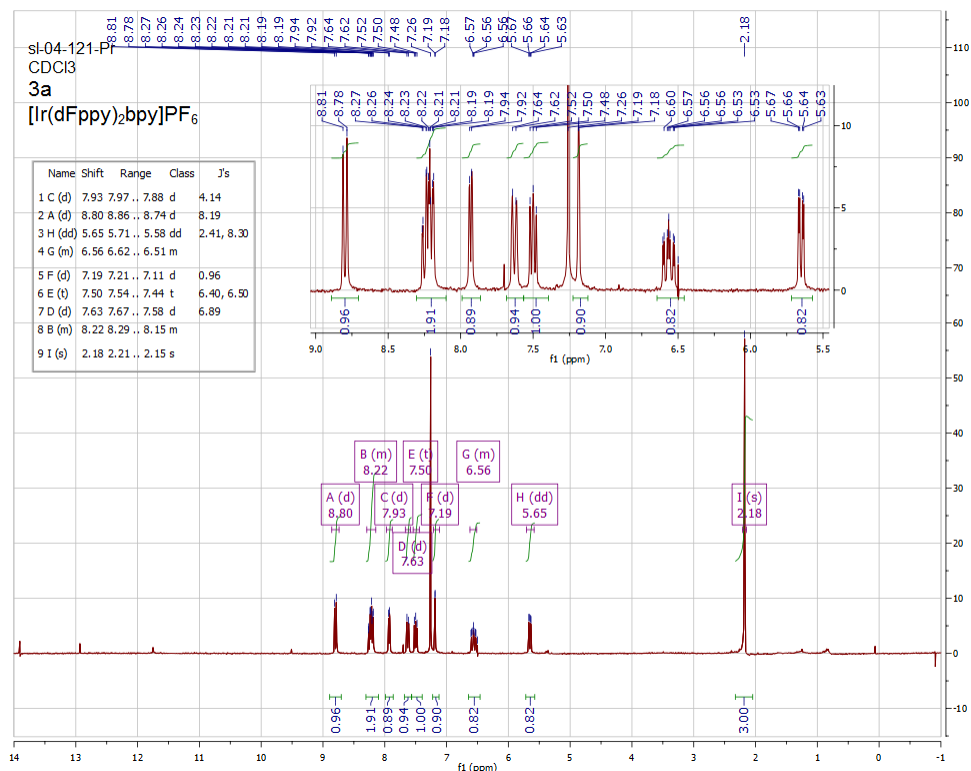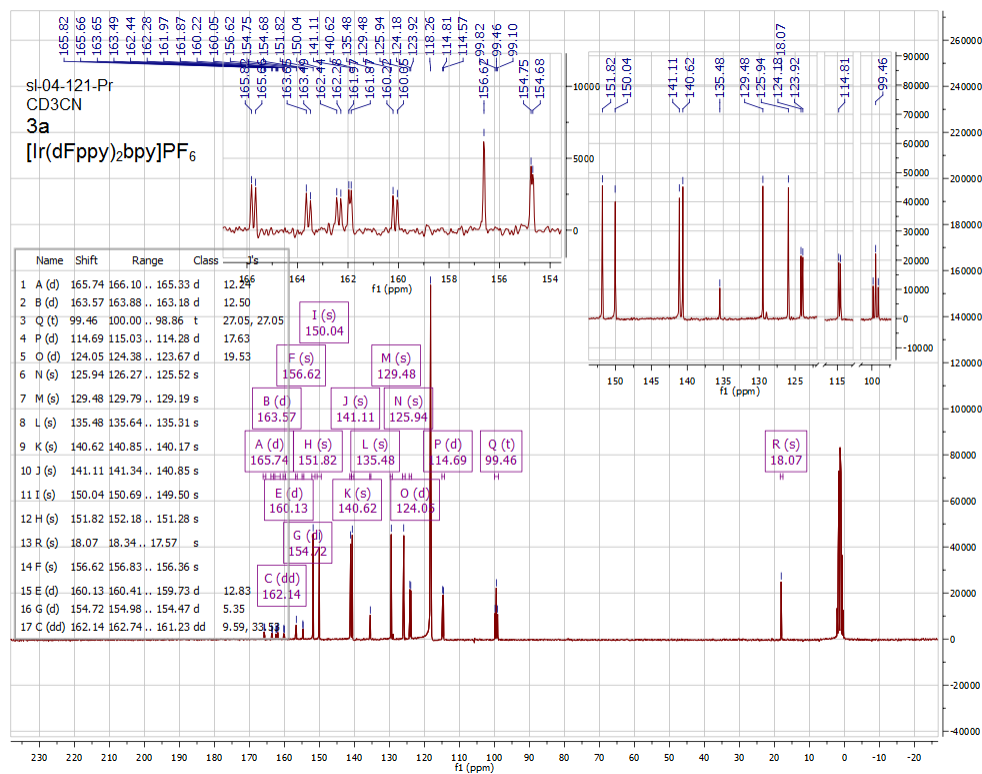

**Figure S 38:**  $^1\text{H}$  and  $^{13}\text{C}$  NMRs data of **3b**  $[\text{Ir}(\text{dFMeppy})_2\text{dtBubpy}]\text{PF}_6$

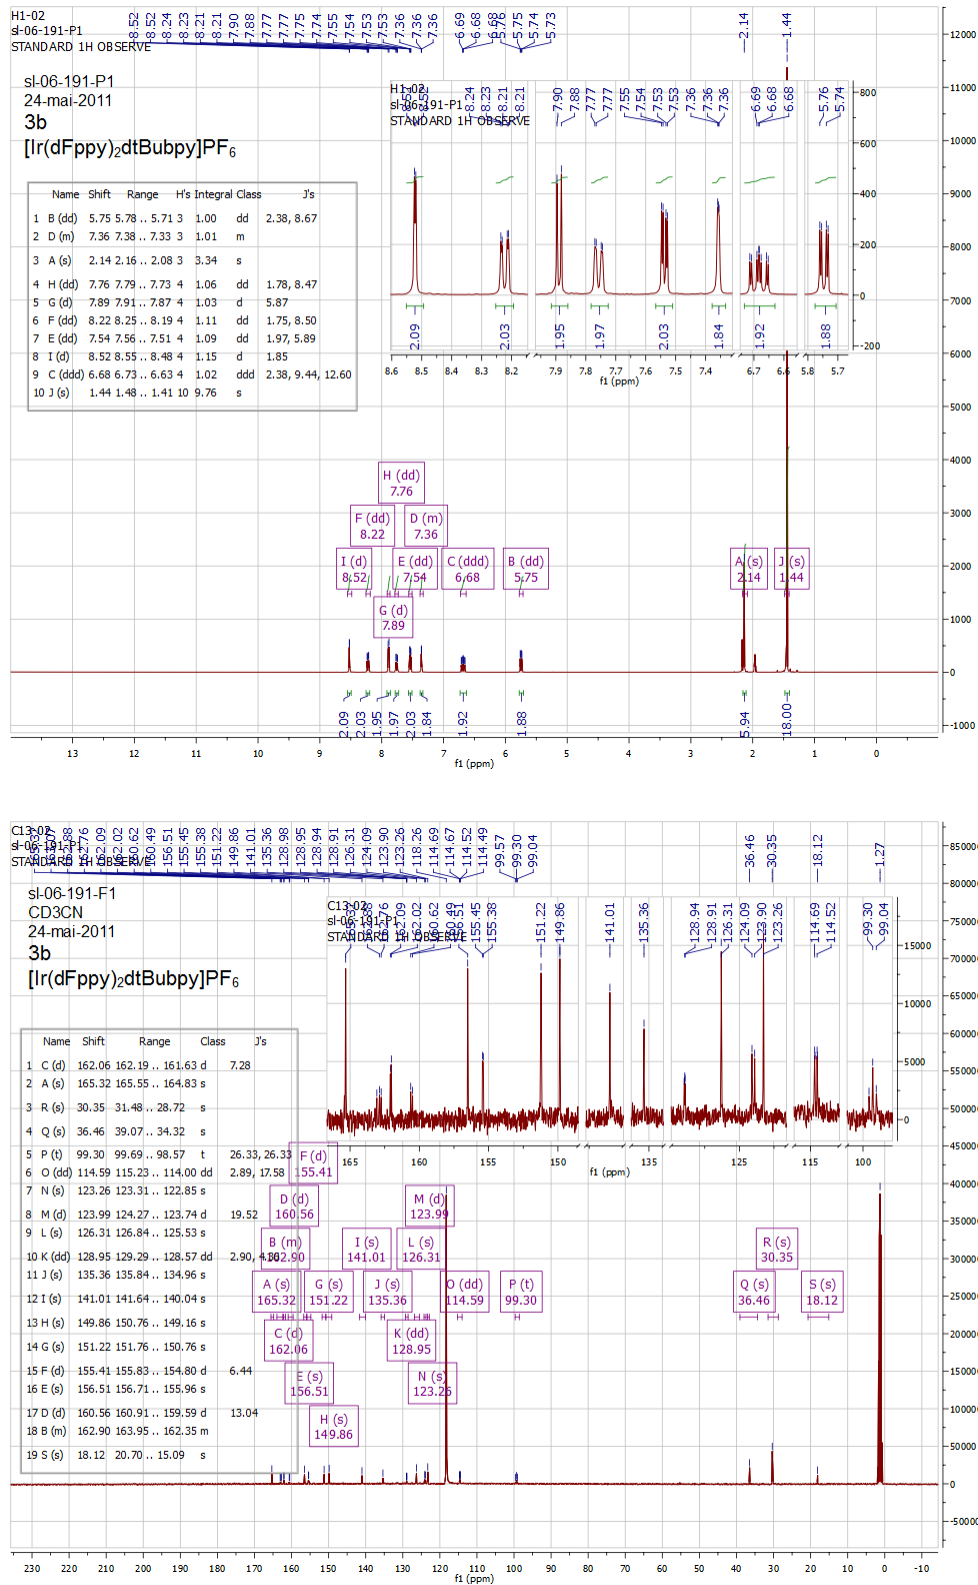

**Figure S 39:**  $^1\text{H}$  and  $^{13}\text{C}$  NMRs data of **4a**  $[\text{Ir}(\text{dFphtl})_2\text{dtBubpy}]\text{PF}_6$

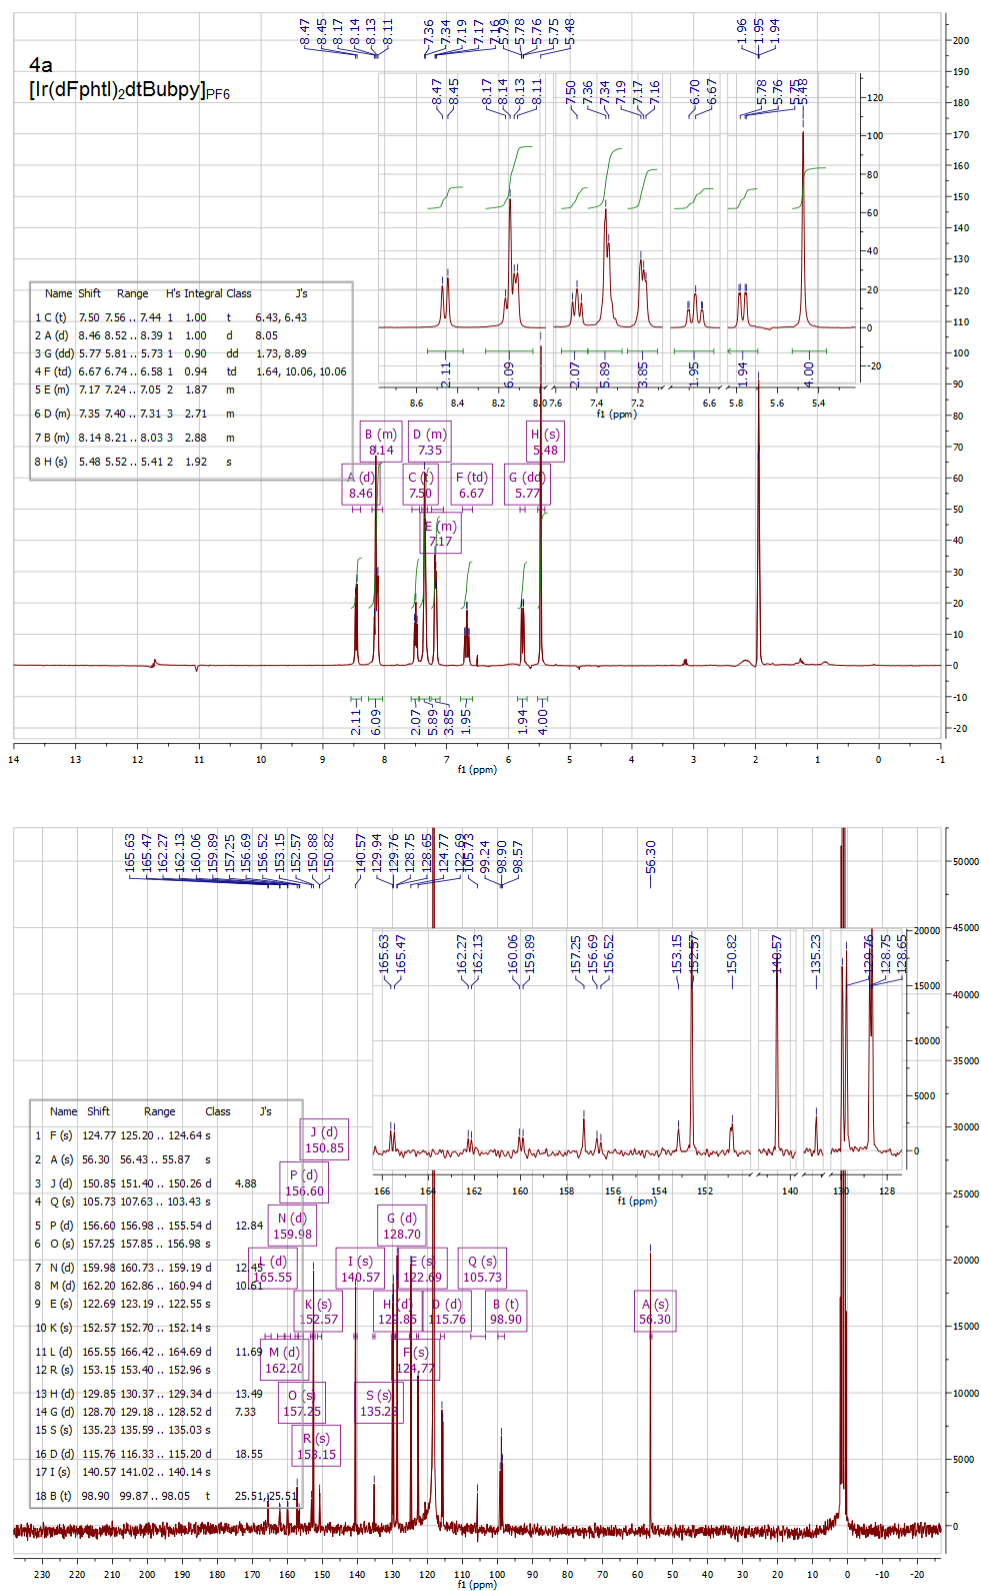



**Figure S 40:**  $^1\text{H}$  and  $^{13}\text{C}$  NMRs data of **4b**  $[\text{Ir}(\text{dFphtl})_2\text{dtBupy}]\text{PF}_6$

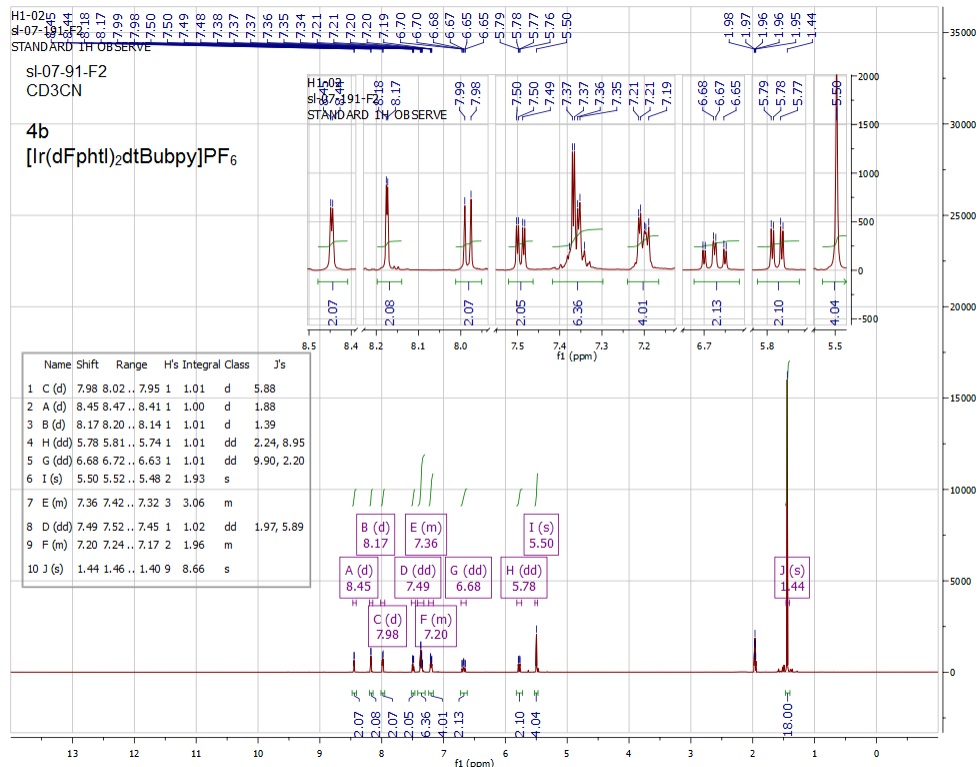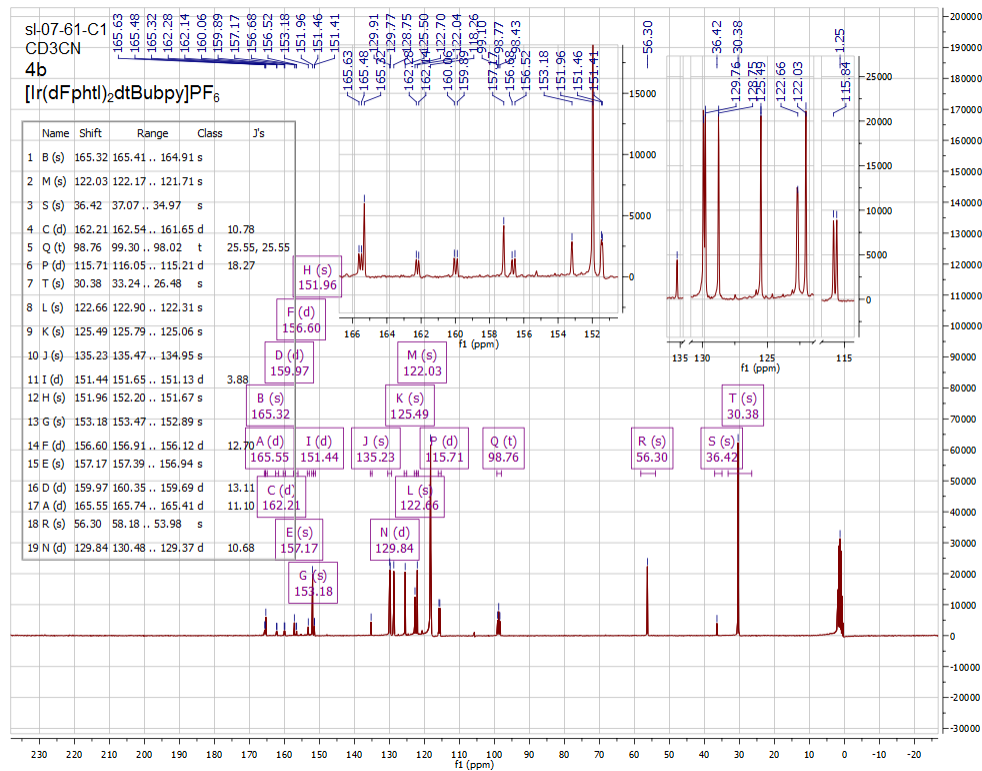

**Table S2:** Visualisation of MOs of **1a** [Ir(ppy)<sub>2</sub>bpy]PF<sub>6</sub>

| Orbital<br>Energy (eV) | Image                                                                               | Orbital<br>Energy (eV) | Image                                                                               | Orbital<br>Energy (eV) | Image                                                                              |
|------------------------|-------------------------------------------------------------------------------------|------------------------|-------------------------------------------------------------------------------------|------------------------|------------------------------------------------------------------------------------|
| HOMO<br>-7.86          | 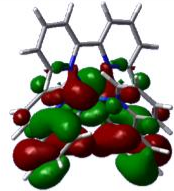   | LUMO<br>-5.12          |    | HSOMO<br>-5.61         |  |
| HOMO-1<br>-8.44        |    | LUMO+1<br>-4.16        |    |                        |                                                                                    |
| HOMO-2<br>-8.60        |    | LUMO+2<br>-4.00        |    |                        |                                                                                    |
| HOMO-3<br>-8.73        |   | LUMO+3<br>-4.00        |   |                        |                                                                                    |
| HOMO-4<br>-8.84        |  | LUMO+4<br>-3.92        |  |                        |                                                                                    |
| HOMO-5<br>-8.95        |  | LUMO+5<br>-3.40        |  |                        |                                                                                    |
| HOMO-6<br>-9.99        |  | LUMO+6<br>-3.35        |  |                        |                                                                                    |
| HOMO-7<br>-10.1        |  | LUMO+7<br>-2.67        |  |                        |                                                                                    |

**Table S3:** Visualisation of MOs of **1b** [Ir(ppy)<sub>2</sub>dtBubpy]PF<sub>6</sub>

| Orbital<br>Energy (eV) | Image                                                                               | Orbital<br>Energy (eV) | Image                                                                               | Orbital<br>Energy (eV) | Image                                                                              |
|------------------------|-------------------------------------------------------------------------------------|------------------------|-------------------------------------------------------------------------------------|------------------------|------------------------------------------------------------------------------------|
| HOMO<br>-7.65          | 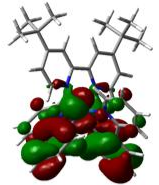   | LUMO<br>-4.68          |    | HSOMO<br>-5.31         |  |
| HOMO-1<br>-8.27        |    | LUMO+1<br>-3.86        |    |                        |                                                                                    |
| HOMO-2<br>-8.41        |    | LUMO+2<br>-3.81        |    |                        |                                                                                    |
| HOMO-3<br>-8.52        |   | LUMO+3<br>-3.73        |   |                        |                                                                                    |
| HOMO-4<br>-8.65        |  | LUMO+4<br>-3.65        |  |                        |                                                                                    |
| HOMO-5<br>-8.73        |  | LUMO+5<br>-3.24        |  |                        |                                                                                    |
| HOMO-6<br>-9.77        |  | LUMO+6<br>-3.18        |  |                        |                                                                                    |
| HOMO-7<br>-9.80        |  | LUMO+7<br>-2.29        |  |                        |                                                                                    |

**Table S4:** Visualisation of MOs of **2a** [Ir(phtl)<sub>2</sub>bpy]PF<sub>6</sub>

| Orbital<br>Energy (eV) | Image                                                                               | Orbital<br>Energy (eV) | Image                                                                               | Orbital<br>Energy (eV) | Image                                                                              |
|------------------------|-------------------------------------------------------------------------------------|------------------------|-------------------------------------------------------------------------------------|------------------------|------------------------------------------------------------------------------------|
| HOMO<br>-7.62          | 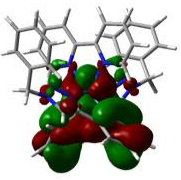   | LUMO<br>-4.63          |    | HSOMO<br>-5.03         |  |
| HOMO-1<br>-8.11        |    | LUMO+1<br>-3.70        |    |                        |                                                                                    |
| HOMO-2<br>-8.33        |    | LUMO+2<br>-3.54        |    |                        |                                                                                    |
| HOMO-3<br>-8.49        |   | LUMO+3<br>-3.40        |   |                        |                                                                                    |
| HOMO-4<br>-8.63        |  | LUMO+4<br>-3.37        |  |                        |                                                                                    |
| HOMO-5<br>-8.71        |  | LUMO+5<br>-2.91        |  |                        |                                                                                    |
| HOMO-6<br>-8.93        |  | LUMO+6<br>-2.75        |  |                        |                                                                                    |
| HOMO-7<br>-9.03        |  | LUMO+7<br>-2.37        |  |                        |                                                                                    |



**Table S5:** Visualisation of MOs of **2b** [Ir(phtl)<sub>2</sub>dtBubpy]PF<sub>6</sub>

| Orbital Energy (eV) | Image                                                                               | Orbital Energy (eV) | Image                                                                               | Orbital Energy (eV) | Image                                                                              |
|---------------------|-------------------------------------------------------------------------------------|---------------------|-------------------------------------------------------------------------------------|---------------------|------------------------------------------------------------------------------------|
| HOMO<br>-7.37       | 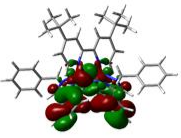   | LUMO<br>-4.22       |    | HSOMO<br>-4.95      |  |
| HOMO-1<br>-7.89     |    | LUMO+1<br>-3.40     |    |                     |                                                                                    |
| HOMO-2<br>-8.08     |    | LUMO+2<br>-3.21     |    |                     |                                                                                    |
| HOMO-3<br>-8.22     |   | LUMO+3<br>-3.10     |   |                     |                                                                                    |
| HOMO-4<br>-8.35     |  | LUMO+4<br>-3.10     |  |                     |                                                                                    |
| HOMO-5<br>-8.44     |  | LUMO+5<br>-2.61     |  |                     |                                                                                    |
| HOMO-6<br>-9.09     |  | LUMO+6<br>-2.50     |  |                     |                                                                                    |
| HOMO-7<br>-9.09     |  | LUMO+7<br>-2.45     |  |                     |                                                                                    |

**Table S6:** Visualisation of MOs of **3a** [Ir(dFppy)<sub>2</sub>bpy]PF<sub>6</sub>

| Orbital<br>Energy (eV) | Image | Orbital<br>Energy (eV) | Image | Orbital<br>Energy (eV) | Image |
|------------------------|-------|------------------------|-------|------------------------|-------|
| HOMO<br>-8.22          |       | LUMO<br>-5.28          |       | HSOMO<br>-5.88         |       |
| HOMO-1<br>-8.54        |       | LUMO+1<br>-4.33        |       |                        |       |
| HOMO-2<br>-8.68        |       | LUMO+2<br>-4.19        |       |                        |       |
| HOMO-3<br>-9.03        |       | LUMO+3<br>-4.11        |       |                        |       |
| HOMO-4<br>-9.03        |       | LUMO+4<br>-4.00        |       |                        |       |
| HOMO-5<br>-9.17        |       | LUMO+5<br>-3.37        |       |                        |       |
| HOMO-6<br>-10.26       |       | LUMO+6<br>-3.32        |       |                        |       |
| HOMO-7<br>-10.31       |       | LUMO+7<br>-2.86        |       |                        |       |

**Table S7:** Visualisation of MOs of **3b** [Ir(dFppy)<sub>2</sub>dtBubpy]PF<sub>6</sub>

| Orbital<br>Energy (eV) | Image                                                                               | Orbital<br>Energy (eV) | Image                                                                               | Orbital<br>Energy (eV) | Image                                                                              |
|------------------------|-------------------------------------------------------------------------------------|------------------------|-------------------------------------------------------------------------------------|------------------------|------------------------------------------------------------------------------------|
| HOMO<br>-8.03          | 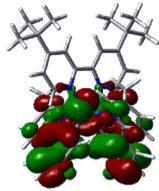   | LUMO<br>-4.84          |    | HSOMO<br>-5.63         |  |
| HOMO-1<br>-8.38        |    | LUMO+1<br>-4.03        |    |                        |                                                                                    |
| HOMO-2<br>-8.49        |    | LUMO+2<br>-3.92        |    |                        |                                                                                    |
| HOMO-3<br>-8.82        |   | LUMO+3<br>-3.86        |   |                        |                                                                                    |
| HOMO-4<br>-8.84        |  | LUMO+4<br>-3.81        |  |                        |                                                                                    |
| HOMO-5<br>-8.93        |  | LUMO+5<br>-3.18        |  |                        |                                                                                    |
| HOMO-6<br>-9.96        |  | LUMO+6<br>-3.16        |  |                        |                                                                                    |
| HOMO-7<br>-10.1        |  | LUMO+7<br>-2.45        |  |                        |                                                                                    |

**Table S8:** Visualisation of MOs of **4a** [Ir(dFphtl)<sub>2</sub>bpy]PF<sub>6</sub>

| Orbital<br>Energy (eV) | Image                                                                               | Orbital<br>Energy (eV) | Image                                                                               | Orbital<br>Energy (eV) | Image                                                                              |
|------------------------|-------------------------------------------------------------------------------------|------------------------|-------------------------------------------------------------------------------------|------------------------|------------------------------------------------------------------------------------|
| HOMO<br>-8.08          | 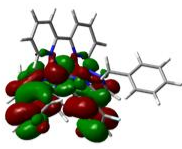   | LUMO<br>-4.87          |    | HSOMO<br>-5.66         |  |
| HOMO-1<br>-8.35        |    | LUMO+1<br>-3.92        |    |                        |                                                                                    |
| HOMO-2<br>-8.52        |    | LUMO+2<br>-3.76        |    |                        |                                                                                    |
| HOMO-3<br>-8.90        |   | LUMO+3<br>-3.62        |   |                        |                                                                                    |
| HOMO-4<br>-8.90        |  | LUMO+4<br>-3.54        |  |                        |                                                                                    |
| HOMO-5<br>-8.93        |  | LUMO+5<br>-3.02        |  |                        |                                                                                    |
| HOMO-6<br>-8.98        |  | LUMO+6<br>-2.88        |  |                        |                                                                                    |
| HOMO-7<br>-9.01        |  | LUMO+7<br>-2.64        |  |                        |                                                                                    |



**Table S9:** Visualisation of MOs of **4b** [Ir(dFphtl)<sub>2</sub>dtBubpy]PF<sub>6</sub>

| Orbital<br>Energy (eV) | Image | Orbital<br>Energy (eV) | Image | Orbital<br>Energy (eV) | Image |
|------------------------|-------|------------------------|-------|------------------------|-------|
| HOMO<br>-7.92          |       | LUMO<br>-4.46          |       | HSOMO<br>-5.61         |       |
| HOMO-1<br>-8.22        |       | LUMO+1<br>-3.65        |       |                        |       |
| HOMO-2<br>-8.38        |       | LUMO+2<br>-3.48        |       |                        |       |
| HOMO-3<br>-8.71        |       | LUMO+3<br>-3.43        |       |                        |       |
| HOMO-4<br>-8.76        |       | LUMO+4<br>-3.37        |       |                        |       |
| HOMO-5<br>-8.82        |       | LUMO+5<br>-2.91        |       |                        |       |
| HOMO-6<br>-8.82        |       | LUMO+6<br>-2.78        |       |                        |       |
| HOMO-7<br>-8.87        |       | LUMO+7<br>-2.53        |       |                        |       |

**Table S10:** Energy and composition of TD-DFT calculated transitions of **1a**

| No. | Energy<br>(cm <sup>-1</sup> ) | Wavelength<br>(nm) | Oscillator<br>Strength | Symmetry  | Major contributions                                                        |
|-----|-------------------------------|--------------------|------------------------|-----------|----------------------------------------------------------------------------|
| 1   | 16464.3093                    | 607.374402         | 0.0002                 | Singlet-A | HOMO->LUMO (99%)                                                           |
| 2   | 22152.977                     | 451.4066           | 0.0005                 | Singlet-A | H-4->LUMO (21%), H-2->LUMO (78%)                                           |
| 3   | 22517.5421                    | 444.098204         | 0.0121                 | Singlet-A | H-1->LUMO (99%)                                                            |
| 4   | 24567.8176                    | 407.036562         | 0.0445                 | Singlet-A | H-3->LUMO (85%)                                                            |
| 5   | 24619.4374                    | 406.183124         | 0.001                  | Singlet-A | HOMO->L+1 (96%)                                                            |
| 6   | 25004.9731                    | 399.920446         | 0.035                  | Singlet-A | HOMO->L+3 (94%)                                                            |
| 7   | 25403.4138                    | 393.647881         | 0.0002                 | Singlet-A | H-4->LUMO (76%), H-2->LUMO (-21%)                                          |
| 8   | 25546.9814                    | 391.435678         | 0.0023                 | Singlet-A | HOMO->L+2 (76%), HOMO->L+4 (-21%)                                          |
| 9   | 26112.38                      | 382.960113         | 0.0001                 | Singlet-A | H-5->LUMO (11%), HOMO->L+2 (15%),<br>HOMO->L+4 (64%)                       |
| 10  | 26460.0074                    | 377.928844         | 0.032                  | Singlet-A | H-5->LUMO (77%), HOMO->L+4 (-12%)                                          |
| 11  | 30127.4357                    | 331.923371         | 0.0085                 | Singlet-A | H-1->L+1 (91%)                                                             |
| 12  | 30468.6106                    | 328.20663          | 0.0004                 | Singlet-A | H-4->L+1 (11%), H-2->L+1 (66%), HOMO-><br>L+5 (-19%)                       |
| 13  | 30533.1354                    | 327.513041         | 0.0092                 | Singlet-A | H-2->L+1 (16%), HOMO->L+5 (72%)                                            |
| 14  | 30814.6248                    | 324.521232         | 0.0098                 | Singlet-A | H-1->L+3 (81%)                                                             |
| 15  | 30874.3102                    | 323.893876         | 0.0001                 | Singlet-A | HOMO->L+6 (94%)                                                            |
| 16  | 30906.5726                    | 323.555773         | 0.0287                 | Singlet-A | H-2->L+3 (49%), H-1->L+2 (11%), H-1->L+4 (-<br>11%)                        |
| 17  | 31263.0722                    | 319.866197         | 0.0225                 | Singlet-A | H-2->L+3 (-15%), H-1->L+2 (74%)                                            |
| 18  | 31619.5717                    | 316.259818         | 0.0212                 | Singlet-A | H-1->L+4 (76%)                                                             |
| 19  | 31786.5296                    | 314.598672         | 0                      | Singlet-A | H-3->L+3 (21%), H-2->L+2 (32%), H-2->L+4 (-<br>18%)                        |
| 20  | 31892.9955                    | 313.548472         | 0.0139                 | Singlet-A | H-3->L+1 (11%), H-2->L+2 (29%), H-2->L+4<br>(32%)                          |
| 21  | 32079.3109                    | 311.727395         | 0.041                  | Singlet-A | H-3->L+1 (63%), H-2->L+2 (-12%)                                            |
| 22  | 32900.389                     | 303.947774         | 0.0442                 | Singlet-A | H-5->L+2 (13%), H-3->L+2 (59%), H-3->L+4 (-<br>11%)                        |
| 23  | 33045.5698                    | 302.612425         | 0.011                  | Singlet-A | H-6->LUMO (92%)                                                            |
| 24  | 33146.3898                    | 301.691981         | 0.0068                 | Singlet-A | H-4->L+1 (71%), H-2->L+1 (-12%)                                            |
| 25  | 33298.023                     | 300.31813          | 0.0093                 | Singlet-A | H-3->L+1 (10%), H-3->L+3 (39%), H-2->L+4<br>(14%)                          |
| 26  | 33337.5445                    | 299.962104         | 0.0345                 | Singlet-A | H-3->L+4 (55%)                                                             |
| 27  | 34093.2912                    | 293.312838         | 0.002                  | Singlet-A | H-5->L+1 (66%), H-3->L+3 (11%)                                             |
| 28  | 34177.98                      | 292.586045         | 0.0514                 | Singlet-A | H-4->L+3 (64%), H-2->L+3 (-12%)                                            |
| 29  | 34405.4299                    | 290.651796         | 0.0443                 | Singlet-A | H-4->L+2 (31%), H-4->L+4 (-28%), H-1->L+5 (-<br>18%)                       |
| 30  | 34446.5645                    | 290.304713         | 0.0001                 | Singlet-A | H-9->LUMO (-11%), H-7->LUMO (78%)                                          |
| 31  | 34560.2894                    | 289.349429         | 0.0063                 | Singlet-A | H-5->L+1 (10%), H-5->L+3 (50%), H-4->L+2<br>(10%)                          |
| 32  | 34820.8083                    | 287.184603         | 0.0022                 | Singlet-A | H-4->L+2 (38%), H-4->L+4 (35%), H-2->L+4 (-<br>12%)                        |
| 33  | 34879.6872                    | 286.699819         | 0.0069                 | Singlet-A | H-5->L+2 (-31%), H-5->L+4 (32%), H-3->L+2<br>(10%)                         |
| 34  | 35185.3734                    | 284.209006         | 0.0002                 | Singlet-A | H-9->LUMO (42%), H-5->L+2 (-19%), H-5-><br>L+4 (-17%)                      |
| 35  | 35392.6594                    | 282.544465         | 0.0003                 | Singlet-A | H-9->LUMO (44%), H-5->L+2 (19%), H-5-><br>L+4 (11%)                        |
| 36  | 36386.3413                    | 274.828401         | 0.005                  | Singlet-A | H-2->L+6 (-38%), H-1->L+5 (50%)                                            |
| 37  | 36432.3152                    | 274.481595         | 0.0056                 | Singlet-A | H-2->L+5 (48%), H-1->L+6 (-40%)                                            |
| 38  | 36732.3555                    | 272.239552         | 0.0012                 | Singlet-A | HOMO->L+7 (98%)                                                            |
| 39  | 37384.8626                    | 267.487943         | 0.0143                 | Singlet-A | H-3->L+5 (46%), H-2->L+6 (-22%), H-1->L+5 (-<br>13%)                       |
| 40  | 37623.6043                    | 265.79059          | 0.2322                 | Singlet-A | H-5->L+4 (-10%), H-3->L+6 (-26%), H-2->L+5<br>(14%), H-1->L+6 (33%)        |
| 41  | 37987.3629                    | 263.245439         | 0.2955                 | Singlet-A | H-8->LUMO (65%)                                                            |
| 42  | 38207.5538                    | 261.72835          | 0.2391                 | Singlet-A | H-3->L+6 (53%)                                                             |
| 43  | 38357.5739                    | 260.704705         | 0.099                  | Singlet-A | H-3->L+5 (35%), H-2->L+6 (14%)                                             |
| 44  | 38984.271                     | 256.51371          | 0.0006                 | Singlet-A | HOMO->L+9 (42%), HOMO->L+10 (-33%)                                         |
| 45  | 39137.5174                    | 255.509308         | 0.006                  | Singlet-A | H-10->LUMO (99%)                                                           |
| 46  | 39281.8917                    | 254.570225         | 0.0142                 | Singlet-A | H-4->L+5 (79%), H-2->L+5 (-11%)                                            |
| 47  | 39602.9026                    | 252.506745         | 0.0046                 | Singlet-A | H-4->L+6 (75%), H-2->L+6 (-14%)                                            |
| 48  | 39706.9488                    | 251.845088         | 0.0013                 | Singlet-A | H-11->LUMO (97%)                                                           |
| 49  | 39982.7923                    | 250.107594         | 0.0001                 | Singlet-A | H-5->L+5 (78%)                                                             |
| 50  | 40036.0253                    | 249.775045         | 0.0327                 | Singlet-A | H-5->L+6 (53%), HOMO->L+8 (29%)<br>H-5->L+6 (32%), HOMO->L+8 (-25%), HOMO- |

| No. | Energy<br>(cm <sup>-1</sup> ) | Wavelength<br>(nm) | Oscillator<br>Strength | Symmetry  | Major contributions                                                                 |
|-----|-------------------------------|--------------------|------------------------|-----------|-------------------------------------------------------------------------------------|
| 51  | 40386.8789                    | 247.60517          | 0.1395                 | Singlet-A | >L+13 (-10%)                                                                        |
| 52  | 41047.4515                    | 243.620484         | 0.002                  | Singlet-A | H-6->L+1 (94%)                                                                      |
| 53  | 41363.623                     | 241.75832          | 0.0002                 | Singlet-A | H-6->L+3 (68%)                                                                      |
| 54  | 41501.5448                    | 240.954886         | 0.0021                 | Singlet-A | H-6->L+3 (-15%), H-4->L+9 (-11%), H-4->L+10 (10%), H-2->L+9 (-17%), H-2->L+10 (18%) |
| 55  | 41598.332                     | 240.394254         | 0.0002                 | Singlet-A | H-7->L+3 (29%), H-6->L+2 (-20%), H-6->L+4 (35%)                                     |
| 56  | 41820.136                     | 239.119261         | 0.0016                 | Singlet-A | H-5->L+9 (14%), H-5->L+10 (-11%), H-3->L+9 (10%), H-1->L+7 (22%)                    |
| 57  | 42155.665                     | 237.216042         | 0.0061                 | Singlet-A | H-7->L+3 (11%), H-6->L+2 (49%), H-6->L+4 (10%)                                      |
| 58  | 42170.9896                    | 237.12984          | 0.0148                 | Singlet-A | H-7->L+1 (-13%), H-6->L+2 (-11%), H-1->L+7 (44%)                                    |
| 59  | 42402.4723                    | 235.835305         | 0.0187                 | Singlet-A | H-12->LUMO (29%), H-8->L+2 (-17%), H-2->L+7 (-25%)                                  |
| 60  | 42474.2562                    | 235.43673          | 0.0058                 | Singlet-A | H-7->L+1 (63%), H-1->L+7 (11%)                                                      |
| 61  | 42740.421                     | 233.970555         | 0.0112                 | Singlet-A | H-13->LUMO (34%), H-8->L+1 (-28%)                                                   |
| 62  | 42873.5034                    | 233.244293         | 0.0004                 | Singlet-A | H-12->LUMO (40%), H-2->L+7 (44%)                                                    |
| 63  | 43200.9667                    | 231.476302         | 0.011                  | Singlet-A | H-7->L+3 (-39%), H-6->L+4 (41%)                                                     |
| 64  | 43270.3309                    | 231.105235         | 0.0174                 | Singlet-A | H-7->L+2 (40%), H-7->L+4 (-33%), H-6->L+3 (10%)                                     |
| 65  | 43441.3216                    | 230.195575         | 0.0066                 | Singlet-A | H-9->L+1 (75%)                                                                      |
| 66  | 43779.2702                    | 228.418609         | 0.0016                 | Singlet-A | H-7->L+2 (38%), H-7->L+4 (39%)                                                      |
| 67  | 43805.8867                    | 228.279821         | 0.0007                 | Singlet-A | H-13->LUMO (-21%), H-5->L+7 (13%), H-3->L+7 (42%)                                   |
| 68  | 43867.9918                    | 227.956639         | 0.0077                 | Singlet-A | H-9->L+3 (81%)                                                                      |
| 69  | 44093.0221                    | 226.793255         | 0.037                  | Singlet-A | H-9->L+2 (27%), H-9->L+4 (-15%), HOMO->L+9 (-15%), HOMO->L+10 (-24%)                |
| 70  | 44392.2558                    | 225.264515         | 0.014                  | Singlet-A | H-9->L+2 (38%), HOMO->L+9 (15%), HOMO->L+10 (20%)                                   |
| 71  | 44720.5258                    | 223.610967         | 0.0446                 | Singlet-A | H-15->LUMO (10%), H-13->LUMO (19%), H-8->L+1 (30%), H-3->L+7 (27%)                  |
| 72  | 44722.1389                    | 223.602901         | 0.0235                 | Singlet-A | H-12->LUMO (14%), H-9->L+4 (-16%), H-8->L+2 (25%)                                   |
| 73  | 44794.7293                    | 223.24055          | 0.013                  | Singlet-A | H-9->L+2 (15%), H-9->L+4 (46%)                                                      |
| 74  | 44880.2246                    | 222.815284         | 0.0729                 | Singlet-A | HOMO->L+8 (-19%), HOMO->L+12 (49%), HOMO->L+13 (14%)                                |
| 75  | 45112.5139                    | 221.667984         | 0.0014                 | Singlet-A | H-8->L+3 (90%)                                                                      |
| 76  | 45412.5542                    | 220.203425         | 0.0131                 | Singlet-A | H-4->L+7 (69%)                                                                      |
| 77  | 45839.2245                    | 218.153778         | 0.0012                 | Singlet-A | H-8->L+4 (84%)                                                                      |
| 78  | 45931.1723                    | 217.717064         | 0.0073                 | Singlet-A | H-4->L+8 (22%), H-2->L+8 (45%)                                                      |
| 79  | 45945.6904                    | 217.648269         | 0.0019                 | Singlet-A | H-14->LUMO (-12%), H-1->L+8 (37%), HOMO->L+11 (-30%)                                |
| 80  | 45999.7299                    | 217.392581         | 0.0092                 | Singlet-A | H-14->LUMO (72%), H-1->L+8 (11%)                                                    |
| 81  | 46048.9301                    | 217.160311         | 0.0073                 | Singlet-A | H-5->L+7 (78%), H-3->L+7 (-16%)                                                     |
| 82  | 46907.1099                    | 213.187298         | 0.0008                 | Singlet-A | H-10->L+1 (92%)                                                                     |
| 83  | 47078.1006                    | 212.412987         | 0.0022                 | Singlet-A | H-1->L+9 (43%), HOMO->L+13 (23%)                                                    |
| 84  | 47080.5203                    | 212.402071         | 0.0001                 | Singlet-A | H-6->L+5 (71%)                                                                      |
| 85  | 47111.1696                    | 212.263887         | 0.0007                 | Singlet-A | H-6->L+5 (13%), H-5->L+8 (20%), H-3->L+8 (22%), HOMO->L+11 (17%)                    |
| 86  | 47278.1275                    | 211.514299         | 0.0023                 | Singlet-A | H-10->L+3 (-12%), H-6->L+6 (50%), H-1->L+10 (-11%)                                  |
| 87  | 47412.0165                    | 210.916994         | 0.0065                 | Singlet-A | H-10->L+3 (-24%), H-1->L+10 (27%)                                                   |
| 88  | 47433.7936                    | 210.820161         | 0.0002                 | Singlet-A | H-11->L+1 (76%)                                                                     |
| 89  | 47625.7549                    | 209.970425         | 0.0038                 | Singlet-A | H-10->L+3 (18%), H-7->L+5 (35%), H-6->L+6 (21%)                                     |
| 90  | 47654.791                     | 209.84249          | 0.0455                 | Singlet-A | H-16->LUMO (61%)                                                                    |
| 91  | 47761.257                     | 209.374724         | 0.0006                 | Singlet-A | H-11->L+3 (23%), H-10->L+2 (15%), H-10->L+4 (-18%), H-7->L+6 (-15%)                 |
| 92  | 47933.8608                    | 208.620792         | 0.0019                 | Singlet-A | H-18->LUMO (11%), H-15->LUMO (73%)                                                  |
| 93  | 48233.0946                    | 207.326527         | 0.0001                 | Singlet-A | H-11->L+1 (-10%), H-10->L+2 (75%)                                                   |
| 94  | 48449.2526                    | 206.401533         | 0.0155                 | Singlet-A | H-10->L+3 (-11%), H-7->L+5 (47%), H-6->L+6 (-23%)                                   |
| 95  | 48683.9616                    | 205.406456         | 0.0023                 | Singlet-A | H-11->L+2 (89%)                                                                     |
| 96  | 48711.3846                    | 205.290818         | 0.0101                 | Singlet-A | H-7->L+6 (30%), H-2->L+9 (-18%), H-2->L+10 (-10%)                                   |
| 97  | 48727.5158                    | 205.222857         | 0.0122                 | Singlet-A | H-7->L+6 (33%), H-2->L+9 (13%)                                                      |
| 98  | 48879.9557                    | 204.582837         | 0.0157                 | Singlet-A | H-19->LUMO (10%), H-17->LUMO (62%)                                                  |
| 99  | 48999.3266                    | 204.084438         | 0.0005                 | Singlet-A | H-11->L+3 (42%), H-10->L+4 (55%)                                                    |
| 100 | 49090.4678                    | 203.705535         | 0.0268                 | Singlet-A | H-11->L+4 (-26%), H-10->L+3 (-18%), H-9->L+5 (29%)                                  |

**Table S11:** Energy and composition of TD-DFT calculated transitions of **1b**

| No. | Energy<br>(cm <sup>-1</sup> ) | Wavelength<br>(nm) | Oscillator<br>Strength | Symmetry  | Major contributions                                |
|-----|-------------------------------|--------------------|------------------------|-----------|----------------------------------------------------|
| 1   | 18338.7547                    | 545.293296         | 0.0003                 | Singlet-A | HOMO->LUMO (99%)                                   |
| 2   | 23836.2677                    | 419.528767         | 0.0009                 | Singlet-A | H-4->LUMO (13%), H-2->LUMO (86%)                   |
| 3   | 24471.0304                    | 408.646462         | 0.0292                 | Singlet-A | H-1->LUMO (96%)                                    |
| 4   | 24697.6738                    | 404.896433         | 0.0305                 | Singlet-A | HOMO->L+1 (34%), HOMO->L+2 (63%)                   |
| 5   | 25490.5222                    | 392.302673         | 0.0035                 | Singlet-A | HOMO->L+1 (64%), HOMO->L+2 (-34%)                  |
| 6   | 25579.2438                    | 390.941971         | 0.0011                 | Singlet-A | HOMO->L+3 (94%)                                    |
| 7   | 26054.3077                    | 383.813691         | 0.054                  | Singlet-A | H-3->LUMO (79%)                                    |
| 8   | 26999.596                     | 370.375912         | 0.0152                 | Singlet-A | HOMO->L+4 (90%)                                    |
| 9   | 27505.3091                    | 363.566174         | 0.0001                 | Singlet-A | H-4->LUMO (86%), H-2->LUMO (-14%)                  |
| 10  | 28326.3872                    | 353.027724         | 0.0179                 | Singlet-A | H-5->LUMO (90%)                                    |
| 11  | 30221.8032                    | 330.886941         | 0.0036                 | Singlet-A | HOMO->L+5 (82%)                                    |
| 12  | 30447.64                      | 328.43268          | 0.0165                 | Singlet-A | H-1->L+1 (39%), H-1->L+2 (35%)                     |
| 13  | 30471.0302                    | 328.180568         | 0.0336                 | Singlet-A | H-2->L+1 (16%), H-2->L+2 (41%), HOMO->L+5 (-15%)   |
| 14  | 30533.9419                    | 327.504389         | 0.0004                 | Singlet-A | HOMO->L+6 (90%)                                    |
| 15  | 31034.8157                    | 322.218766         | 0.0037                 | Singlet-A | H-2->L+1 (61%), H-1->L+3 (23%)                     |
| 16  | 31150.1538                    | 321.025703         | 0.0097                 | Singlet-A | H-2->L+3 (17%), H-1->L+1 (47%), H-1->L+2 (-22%)    |
| 17  | 31416.3186                    | 318.305914         | 0.0426                 | Singlet-A | H-2->L+2 (28%), H-1->L+3 (53%)                     |
| 18  | 31514.7189                    | 317.312048         | 0.0022                 | Singlet-A | H-3->L+2 (-16%), H-2->L+3 (29%), H-1->L+2 (34%)    |
| 19  | 32401.9349                    | 308.623545         | 0.0476                 | Singlet-A | H-3->L+1 (61%), H-2->L+3 (12%)                     |
| 20  | 32484.204                     | 307.841928         | 0.0077                 | Singlet-A | H-1->L+4 (80%)                                     |
| 21  | 32690.6834                    | 305.897552         | 0.0196                 | Singlet-A | H-3->L+2 (-13%), H-2->L+4 (64%)                    |
| 22  | 32804.4083                    | 304.837079         | 0.081                  | Singlet-A | H-3->L+3 (73%)                                     |
| 23  | 33381.0987                    | 299.570727         | 0.014                  | Singlet-A | H-3->L+2 (42%), H-2->L+3 (15%), H-2->L+4 (17%)     |
| 24  | 33943.271                     | 294.609202         | 0.0331                 | Singlet-A | H-4->L+1 (61%), H-4->L+2 (12%)                     |
| 25  | 34026.3467                    | 293.889911         | 0.0008                 | Singlet-A | H-3->L+4 (72%), H-1->L+4 (-15%)                    |
| 26  | 34336.8723                    | 291.232117         | 0.0216                 | Singlet-A | H-5->L+1 (25%), H-5->L+2 (28%), H-1->L+5 (14%)     |
| 27  | 34413.4955                    | 290.583675         | 0.0146                 | Singlet-A | H-4->L+1 (-19%), H-4->L+2 (59%)                    |
| 28  | 34537.7058                    | 289.53863          | 0.0078                 | Singlet-A | H-5->L+1 (-12%), H-4->L+3 (59%), H-2->L+3 (-10%)   |
| 29  | 34718.3752                    | 288.031912         | 0.004                  | Singlet-A | H-6->LUMO (91%)                                    |
| 30  | 34893.3987                    | 286.587159         | 0.005                  | Singlet-A | H-5->L+3 (65%), H-2->L+5 (12%)                     |
| 31  | 35083.7469                    | 285.03227          | 0.0224                 | Singlet-A | H-5->L+1 (47%), H-5->L+2 (-32%)                    |
| 32  | 36020.9696                    | 277.61607          | 0.0061                 | Singlet-A | H-4->L+4 (78%)                                     |
| 33  | 36033.068                     | 277.522858         | 0.002                  | Singlet-A | H-2->L+5 (53%), H-1->L+6 (-32%)                    |
| 34  | 36073.396                     | 277.212603         | 0.0042                 | Singlet-A | H-2->L+6 (49%), H-1->L+5 (-37%)                    |
| 35  | 36241.967                     | 275.923213         | 0.0006                 | Singlet-A | H-9->LUMO (10%), H-8->LUMO (81%)                   |
| 36  | 36518.6171                    | 273.832932         | 0.0051                 | Singlet-A | H-5->L+4 (71%), H-3->L+4 (-14%)                    |
| 37  | 37083.2091                    | 269.663825         | 0.0087                 | Singlet-A | H-3->L+5 (56%), H-1->L+5 (-22%)                    |
| 38  | 37225.9702                    | 268.629667         | 0.0053                 | Singlet-A | H-9->LUMO (86%)                                    |
| 39  | 37417.9315                    | 267.251545         | 0.1436                 | Singlet-A | H-3->L+6 (44%), H-1->L+6 (-35%)                    |
| 40  | 37699.421                     | 265.256063         | 0.2483                 | Singlet-A | H-5->L+3 (-10%), H-3->L+6 (44%)                    |
| 41  | 37989.7826                    | 263.228672         | 0.1331                 | Singlet-A | H-4->L+3 (-13%), H-3->L+5 (28%), H-2->L+6 (16%)    |
| 42  | 38109.1534                    | 262.40415          | 0.0001                 | Singlet-A | HOMO->L+7 (91%)                                    |
| 43  | 38148.6749                    | 262.132303         | 0.3945                 | Singlet-A | H-7->LUMO (68%)                                    |
| 44  | 39146.3896                    | 255.451399         | 0.0003                 | Singlet-A | HOMO->L+9 (28%), HOMO->L+10 (42%)                  |
| 45  | 39236.7243                    | 254.863273         | 0.0225                 | Singlet-A | H-4->L+5 (82%)                                     |
| 46  | 39520.6334                    | 253.032382         | 0.0064                 | Singlet-A | H-4->L+6 (80%), H-2->L+6 (-10%)                    |
| 47  | 39856.969                     | 250.897152         | 0.0007                 | Singlet-A | H-5->L+5 (80%)                                     |
| 48  | 39903.7494                    | 250.603017         | 0.0124                 | Singlet-A | H-5->L+6 (70%), HOMO->L+8 (18%)                    |
| 49  | 40420.7544                    | 247.397659         | 0.1675                 | Singlet-A | H-5->L+6 (-18%), HOMO->L+8 (37%), HOMO->L+13 (15%) |
| 50  | 41014.3826                    | 243.816909         | 0.001                  | Singlet-A | H-6->L+1 (21%), H-6->L+2 (62%)                     |

| No. | Energy<br>(cm <sup>-1</sup> ) | Wavelength<br>(nm) | Oscillator<br>Strength | Symmetry  | Major contributions                                                                     |
|-----|-------------------------------|--------------------|------------------------|-----------|-----------------------------------------------------------------------------------------|
| 51  | 41236.9931                    | 242.500707         | 0.002                  | Singlet-A | H-10->LUMO (95%)                                                                        |
| 52  | 41332.9738                    | 241.937589         | 0.0004                 | Singlet-A | H-8->L+2 (27%), H-6->L+3 (53%)                                                          |
| 53  | 41501.5448                    | 240.954886         | 0.0044                 | Singlet-A | H-4->L+10 (11%), H-2->L+9 (17%), H-2->L+10 (33%)                                        |
| 54  | 41658.0174                    | 240.04983          | 0.0001                 | Singlet-A | H-6->L+1 (60%), H-6->L+2 (-19%)                                                         |
| 55  | 41710.4438                    | 239.748108         | 0.0015                 | Singlet-A | H-5->L+10 (13%), H-3->L+9 (15%), H-3->L+10 (22%), H-1->L+10 (10%)                       |
| 56  | 41813.6835                    | 239.15616          | 0.0039                 | Singlet-A | H-11->LUMO (90%)                                                                        |
| 57  | 42075.8155                    | 237.666219         | 0.0406                 | Singlet-A | H-12->LUMO (43%), H-7->L+1 (27%)                                                        |
| 58  | 42387.9542                    | 235.91608          | 0.0191                 | Singlet-A | H-13->LUMO (45%), H-7->L+4 (-30%)                                                       |
| 59  | 42794.4605                    | 233.675104         | 0.0452                 | Singlet-A | H-8->L+2 (35%), H-6->L+3 (-32%), H-6->L+4 (-10%)                                        |
| 60  | 43035.6219                    | 232.365644         | 0.0019                 | Singlet-A | H-8->L+1 (41%), H-6->L+4 (50%)                                                          |
| 61  | 43087.2418                    | 232.087263         | 0.0126                 | Singlet-A | H-8->L+3 (74%)                                                                          |
| 62  | 43390.5083                    | 230.46515          | 0                      | Singlet-A | H-9->L+1 (12%), H-8->L+1 (36%), H-8->L+2 (-16%), H-6->L+4 (-29%)                        |
| 63  | 43528.4301                    | 229.734911         | 0.0024                 | Singlet-A | H-9->L+1 (11%), H-9->L+2 (35%), H-1->L+7 (32%)                                          |
| 64  | 43715.552                     | 228.751544         | 0.0046                 | Singlet-A | H-9->L+1 (-12%), H-9->L+2 (-14%), H-7->L+2 (12%), H-1->L+7 (42%)                        |
| 65  | 43726.8438                    | 228.692472         | 0.0014                 | Singlet-A | H-7->L+1 (18%), H-7->L+2 (54%)                                                          |
| 66  | 43799.4342                    | 228.313451         | 0.0456                 | Singlet-A | H-2->L+7 (39%), HOMO->L+9 (21%), HOMO->L+10 (-13%)                                      |
| 67  | 44101.8942                    | 226.74763          | 0.0134                 | Singlet-A | H-2->L+7 (37%), HOMO->L+9 (-15%), HOMO->L+10 (16%)                                      |
| 68  | 44318.8589                    | 225.637579         | 0.0019                 | Singlet-A | H-9->L+3 (68%), H-7->L+3 (-10%)                                                         |
| 69  | 44336.6032                    | 225.547274         | 0.0071                 | Singlet-A | H-9->L+1 (51%), H-9->L+2 (-27%)                                                         |
| 70  | 44465.6528                    | 224.892684         | 0.0018                 | Singlet-A | H-7->L+3 (78%)                                                                          |
| 71  | 44710.847                     | 223.659373         | 0.0616                 | Singlet-A | HOMO->L+8 (-19%), HOMO->L+12 (46%), HOMO->L+13 (18%)                                    |
| 72  | 44743.916                     | 223.494072         | 0.0031                 | Singlet-A | H-8->L+4 (84%)                                                                          |
| 73  | 44897.969                     | 222.727224         | 0.003                  | Singlet-A | H-12->LUMO (15%), H-3->L+7 (39%), H-1->L+7 (-17%)                                       |
| 74  | 45660.9747                    | 219.005399         | 0.0132                 | Singlet-A | H-4->L+8 (10%), H-3->L+7 (11%), H-2->L+8 (35%)                                          |
| 75  | 45683.5584                    | 218.897134         | 0.0003                 | Singlet-A | H-9->L+4 (62%), H-1->L+8 (13%)                                                          |
| 76  | 45854.5491                    | 218.080871         | 0.0074                 | Singlet-A | H-9->L+4 (-20%), H-1->L+8 (25%), HOMO->L+11 (23%)                                       |
| 77  | 45854.5491                    | 218.080871         | 0.0318                 | Singlet-A | H-12->LUMO (-10%), H-7->L+1 (10%), H-3->L+7 (20%), H-2->L+8 (-17%)                      |
| 78  | 46013.4414                    | 217.3278           | 0.1192                 | Singlet-A | H-15->LUMO (25%), H-13->LUMO (25%), H-7->L+4 (24%)                                      |
| 79  | 46683.6928                    | 214.207562         | 0.0008                 | Singlet-A | H-6->L+5 (85%)                                                                          |
| 80  | 46748.2176                    | 213.911899         | 0.002                  | Singlet-A | H-5->L+8 (10%), H-4->L+7 (-17%), H-3->L+8 (25%), HOMO->L+11 (-18%)                      |
| 81  | 46901.464                     | 213.212961         | 0.0036                 | Singlet-A | H-14->LUMO (18%), H-6->L+6 (52%)                                                        |
| 82  | 46959.5363                    | 212.949292         | 0.0002                 | Singlet-A | H-4->L+7 (61%)                                                                          |
| 83  | 47005.5102                    | 212.741016         | 0.0047                 | Singlet-A | H-14->LUMO (53%), H-6->L+6 (-24%)                                                       |
| 84  | 47055.517                     | 212.514932         | 0.0031                 | Singlet-A | H-1->L+9 (-20%), HOMO->L+13 (30%)                                                       |
| 85  | 47416.8558                    | 210.895468         | 0.0023                 | Singlet-A | H-10->L+1 (18%), H-10->L+2 (19%), H-8->L+5 (31%)                                        |
| 86  | 47594.299                     | 210.109198         | 0.0085                 | Singlet-A | H-15->LUMO (-10%), H-11->L+2 (-15%), H-10->L+3 (19%), H-8->L+6 (16%)                    |
| 87  | 47646.7254                    | 209.878012         | 0.0024                 | Singlet-A | H-5->L+7 (82%)                                                                          |
| 88  | 47743.5126                    | 209.45254          | 0.0046                 | Singlet-A | H-3->L+9 (-12%), H-3->L+10 (-11%), H-1->L+9 (21%), H-1->L+10 (43%)                      |
| 89  | 47798.3587                    | 209.212205         | 0.1836                 | Singlet-A | H-15->LUMO (47%), H-7->L+4 (-14%)                                                       |
| 90  | 47894.3394                    | 208.792942         | 0.001                  | Singlet-A | H-16->LUMO (85%)                                                                        |
| 91  | 48100.0122                    | 207.900155         | 0.0018                 | Singlet-A | H-10->L+1 (61%), H-8->L+5 (-19%)                                                        |
| 92  | 48135.5008                    | 207.746878         | 0.0059                 | Singlet-A | H-17->LUMO (63%)                                                                        |
| 93  | 48179.8616                    | 207.555598         | 0.0171                 | Singlet-A | H-10->L+2 (30%), H-9->L+5 (-15%), H-8->L+5 (-24%), H-6->L+6 (13%)                       |
| 94  | 48296.8128                    | 207.053            | 0.0001                 | Singlet-A | H-18->LUMO (82%)                                                                        |
| 95  | 48322.6227                    | 206.94241          | 0                      | Singlet-A | H-2->L+9 (46%), H-2->L+10 (-18%)                                                        |
| 96  | 48400.0525                    | 206.611346         | 0.0088                 | Singlet-A | H-9->L+6 (14%), H-8->L+6 (55%)                                                          |
| 97  | 48538.7808                    | 206.020832         | 0.0019                 | Singlet-A | H-19->LUMO (95%)                                                                        |
| 98  | 48648.473                     | 205.556298         | 0.0071                 | Singlet-A | H-11->L+1 (68%), H-11->L+2 (-11%)                                                       |
| 99  | 48755.7454                    | 205.104033         | 0.0138                 | Singlet-A | H-7->L+5 (85%)                                                                          |
| 100 | 48903.3459                    | 204.484986         | 0.0643                 | Singlet-A | H-10->L+2 (-10%), H-9->L+5 (-18%), H-1->L+10 (12%), HOMO->L+12 (18%), HOMO->L+13 (-12%) |



**Table S12:** Energy and composition of TD-DFT calculated transitions of **2a**

| No. | Energy<br>(cm <sup>-1</sup> ) | Wavelength<br>(nm) | Oscillator<br>Strength | Symmetry  | Major contributions                                                                   |
|-----|-------------------------------|--------------------|------------------------|-----------|---------------------------------------------------------------------------------------|
| 1   | 18560.5587                    | 538.776884         | 0.0001                 | Singlet-A | HOMO->LUMO (99%)                                                                      |
| 2   | 23801.5856                    | 420.140077         | 0.0088                 | Singlet-A | H-1->LUMO (98%)                                                                       |
| 3   | 24135.5014                    | 414.327418         | 0.0005                 | Singlet-A | H-4->LUMO (22%), H-2->LUMO (76%)                                                      |
| 4   | 26302.7282                    | 380.188699         | 0.0435                 | Singlet-A | H-5->LUMO (10%), H-3->LUMO (87%)                                                      |
| 5   | 26490.6566                    | 377.491586         | 0.0003                 | Singlet-A | HOMO->L+1 (96%)                                                                       |
| 6   | 27099.6094                    | 369.009008         | 0.0002                 | Singlet-A | H-4->LUMO (75%), H-2->LUMO (-22%)                                                     |
| 7   | 27703.7229                    | 360.962317         | 0.0006                 | Singlet-A | HOMO->L+2 (97%)                                                                       |
| 8   | 27844.8709                    | 359.132569         | 0.0008                 | Singlet-A | HOMO->L+3 (89%)                                                                       |
| 9   | 28252.1837                    | 353.954941         | 0.0017                 | Singlet-A | HOMO->L+4 (85%)                                                                       |
| 10  | 28307.8363                    | 353.259072         | 0.0173                 | Singlet-A | H-5->LUMO (81%), H-3->LUMO (-11%)                                                     |
| 11  | 31328.4035                    | 319.199157         | 0.0023                 | Singlet-A | H-1->L+1 (95%)                                                                        |
| 12  | 31415.512                     | 318.314086         | 0.0002                 | Singlet-A | H-6->LUMO (99%)                                                                       |
| 13  | 32113.1864                    | 311.39856          | 0.004                  | Singlet-A | H-4->L+1 (12%), H-2->L+1 (72%)                                                        |
| 14  | 32208.3605                    | 310.478393         | 0                      | Singlet-A | H-7->LUMO (99%)                                                                       |
| 15  | 32440.6498                    | 308.255231         | 0.0001                 | Singlet-A | H-8->LUMO (99%)                                                                       |
| 16  | 32568.0862                    | 307.049052         | 0.0077                 | Singlet-A | H-1->L+2 (54%), HOMO->L+5 (25%)                                                       |
| 17  | 32622.9323                    | 306.532837         | 0.0268                 | Singlet-A | H-1->L+2 (-37%), HOMO->L+5 (49%)                                                      |
| 18  | 32799.569                     | 304.882055         | 0                      | Singlet-A | H-9->LUMO (100%)                                                                      |
| 19  | 32926.1989                    | 303.709518         | 0.0139                 | Singlet-A | H-1->L+3 (69%)                                                                        |
| 20  | 33239.9507                    | 300.842805         | 0.0088                 | Singlet-A | H-1->L+4 (55%), HOMO->L+6 (15%)                                                       |
| 21  | 33431.1054                    | 299.122625         | 0.0161                 | Singlet-A | H-2->L+2 (33%), H-2->L+3 (12%), H-1->L+4 (-11%)                                       |
| 22  | 33612.5814                    | 297.507647         | 0.0012                 | Singlet-A | H-3->L+1 (39%), H-1->L+4 (12%), HOMO->L+6 (-20%)                                      |
| 23  | 33684.3653                    | 296.873636         | 0.0556                 | Singlet-A | H-2->L+2 (31%), H-2->L+3 (-21%), HOMO->L+6 (-10%)                                     |
| 24  | 33757.7622                    | 296.228166         | 0.0544                 | Singlet-A | H-3->L+1 (23%), H-2->L+3 (-13%), H-2->L+4 (16%), HOMO->L+6 (16%)                      |
| 25  | 34312.6755                    | 291.437489         | 0.0063                 | Singlet-A | H-2->L+4 (26%), HOMO->L+6 (-15%)                                                      |
| 26  | 34665.1422                    | 288.474224         | 0.0034                 | Singlet-A | H-11->LUMO (-16%), H-5->L+2 (13%), H-3->L+2 (56%)                                     |
| 27  | 34666.7554                    | 288.4608           | 0.0071                 | Singlet-A | H-11->LUMO (69%), H-3->L+2 (10%)                                                      |
| 28  | 34743.3786                    | 287.824628         | 0.0005                 | Singlet-A | H-4->L+1 (61%), H-2->L+1 (-15%)                                                       |
| 29  | 35342.6526                    | 282.94424          | 0.0936                 | Singlet-A | H-3->L+3 (39%), H-3->L+4 (26%), H-2->L+3 (-11%)                                       |
| 30  | 35708.8309                    | 280.042772         | 0.0129                 | Singlet-A | H-5->L+1 (49%), H-4->L+2 (-10%), H-3->L+1 (-10%), H-3->L+4 (-11%)                     |
| 31  | 36021.7762                    | 277.609853         | 0.0028                 | Singlet-A | H-5->L+1 (28%), H-4->L+2 (13%), H-3->L+3 (-12%), H-3->L+4 (18%)                       |
| 32  | 36078.2354                    | 277.175419         | 0.0013                 | Singlet-A | H-13->LUMO (-22%), H-12->LUMO (73%)                                                   |
| 33  | 36348.433                     | 275.115024         | 0.0134                 | Singlet-A | H-4->L+2 (52%)                                                                        |
| 34  | 36664.6045                    | 272.742612         | 0.0088                 | Singlet-A | H-13->LUMO (-19%), H-12->LUMO (-11%), H-5->L+2 (22%), H-4->L+3 (11%), H-3->L+2 (-11%) |
| 35  | 36680.7357                    | 272.622667         | 0.0061                 | Singlet-A | H-13->LUMO (36%), H-12->LUMO (10%), H-4->L+3 (27%)                                    |
| 36  | 36977.5498                    | 270.43436          | 0.0054                 | Singlet-A | H-13->LUMO (-12%), H-5->L+2 (-17%), H-4->L+4 (20%)                                    |
| 37  | 37185.6422                    | 268.920997         | 0.0075                 | Singlet-A | H-5->L+3 (11%), H-4->L+4 (-17%), H-1->L+5 (37%)                                       |
| 38  | 37255.0064                    | 268.4203           | 0.0052                 | Singlet-A | H-5->L+4 (-10%), H-4->L+4 (16%), H-1->L+5 (21%)                                       |
| 39  | 37676.8373                    | 265.415059         | 0.001                  | Singlet-A | H-5->L+3 (18%), H-5->L+4 (30%), H-1->L+6 (-19%)                                       |
| 40  | 38279.3376                    | 261.23754          | 0.1154                 | Singlet-A | H-10->LUMO (-17%), H-2->L+5 (27%), H-1->L+6 (-15%)                                    |
| 41  | 38365.6395                    | 260.649897         | 0.0904                 | Singlet-A | H-10->LUMO (-16%), H-6->L+1 (21%), H-6->L+3 (10%)                                     |
| 42  | 38448.7152                    | 260.086714         | 0.0065                 | Singlet-A | H-6->L+1 (37%), H-6->L+3 (15%)                                                        |
| 43  | 38492.2694                    | 259.792424         | 0.104                  | Singlet-A | H-10->LUMO (27%), H-5->L+2 (-10%), H-2->L+5 (32%)                                     |
| 44  | 38685.0373                    | 258.497877         | 0.0067                 | Singlet-A | HOMO->L+7 (46%), HOMO->L+8 (12%)                                                      |
| 45  | 38857.6411                    | 257.349641         | 0.0036                 | Singlet-A | HOMO->L+7 (-17%), HOMO->L+8 (71%)                                                     |
| 46  | 39232.6915                    | 254.889471         | 0.2043                 | Singlet-A | H-1->L+6 (36%)                                                                        |
| 47  | 39360.128                     | 254.064214         | 0.0154                 | Singlet-A | H-7->L+1 (69%), H-7->L+3 (17%)                                                        |
| 48  | 39464.9808                    | 253.389202         | 0.0039                 | Singlet-A | H-3->L+5 (60%), H-2->L+6 (-20%)                                                       |
| 49  | 39654.5224                    | 252.178047         | 0.0195                 | Singlet-A | H-8->L+1 (-25%), H-6->L+1 (-14%), H-6->L+3 (29%)                                      |
| 50  | 39702.916                     | 251.870669         | 0.007                  | Singlet-A | H-8->L+1 (44%), H-8->L+4 (-10%), H-6->L+1 (-11%), H-6->L+3 (26%)                      |

| No. | Energy<br>(cm <sup>-1</sup> ) | Wavelength<br>(nm) | Oscillator<br>Strength | Symmetry  | Major contributions                                                        |
|-----|-------------------------------|--------------------|------------------------|-----------|----------------------------------------------------------------------------|
| 51  | 39845.6771                    | 250.968254         | 0.0685                 | Singlet-A | H-2->L+6 (20%)                                                             |
| 52  | 39918.2675                    | 250.511874         | 0.0302                 | Singlet-A | H-3->L+6 (27%), HOMO->L+12 (28%)                                           |
| 53  | 40163.4618                    | 248.982522         | 0.0003                 | Singlet-A | H-9->L+1 (86%), H-9->L+4 (-10%)                                            |
| 54  | 40324.7738                    | 247.986512         | 0.0007                 | Singlet-A | H-6->L+2 (94%)                                                             |
| 55  | 40404.6232                    | 247.49643          | 0.003                  | Singlet-A | HOMO->L+7 (-12%), HOMO->L+11 (10%),<br>HOMO->L+13 (10%), HOMO->L+14 (42%)  |
| 56  | 40553.0302                    | 246.590697         | 0.0161                 | Singlet-A | H-3->L+6 (43%), HOMO->L+12 (-16%)                                          |
| 57  | 40618.3616                    | 246.194076         | 0.0004                 | Singlet-A | H-7->L+1 (-19%), H-7->L+3 (74%)                                            |
| 58  | 40845.005                     | 244.827979         | 0.0031                 | Singlet-A | H-8->L+1 (20%), H-8->L+2 (15%), H-8->L+4<br>(58%)                          |
| 59  | 40939.3725                    | 244.263637         | 0.0051                 | Singlet-A | HOMO->L+9 (86%)                                                            |
| 60  | 41126.4944                    | 243.152259         | 0.0001                 | Singlet-A | H-7->L+2 (94%)                                                             |
| 61  | 41319.2622                    | 242.017874         | 0.0034                 | Singlet-A | HOMO->L+10 (88%)                                                           |
| 62  | 41370.8821                    | 241.7159           | 0.0015                 | Singlet-A | H-9->L+2 (-13%), H-9->L+4 (-23%), H-8->L+2<br>(50%)                        |
| 63  | 41410.4035                    | 241.48521          | 0                      | Singlet-A | H-9->L+2 (21%), H-9->L+4 (25%), H-8->L+2<br>(31%), H-8->L+4 (-14%)         |
| 64  | 41546.7122                    | 240.692933         | 0.0808                 | Singlet-A | H-5->L+5 (17%), H-4->L+5 (43%), H-2->L+5 (-<br>11%)                        |
| 65  | 41710.4438                    | 239.748108         | 0.0005                 | Singlet-A | H-14->LUMO (98%)                                                           |
| 66  | 41779.0014                    | 239.354691         | 0.0395                 | Singlet-A | H-5->L+5 (45%), H-4->L+5 (-11%)                                            |
| 67  | 41788.6802                    | 239.299254         | 0.0004                 | Singlet-A | H-9->L+2 (61%), H-9->L+4 (-36%)                                            |
| 68  | 41837.0738                    | 239.022453         | 0.0012                 | Singlet-A | HOMO->L+11 (75%)                                                           |
| 69  | 42091.1402                    | 237.579689         | 0.0056                 | Singlet-A | H-4->L+6 (33%), H-2->L+14 (11%)                                            |
| 70  | 42272.6162                    | 236.559762         | 0.0001                 | Singlet-A | H-15->LUMO (96%)                                                           |
| 71  | 42461.3512                    | 235.508285         | 0.0015                 | Singlet-A | H-11->L+1 (-38%), H-6->L+4 (52%)                                           |
| 72  | 42464.5774                    | 235.490392         | 0.0024                 | Singlet-A | H-11->L+1 (46%), H-6->L+4 (45%)                                            |
| 73  | 42566.204                     | 234.92816          | 0.0182                 | Singlet-A | H-1->L+7 (40%)                                                             |
| 74  | 42677.5093                    | 234.315455         | 0.1205                 | Singlet-A | H-5->L+6 (12%), H-5->L+14 (14%), H-3->L+14<br>(10%)                        |
| 75  | 42913.8314                    | 233.025104         | 0.0755                 | Singlet-A | H-5->L+6 (21%), H-4->L+6 (-15%), H-1->L+7 (-<br>10%)                       |
| 76  | 43159.8322                    | 231.696916         | 0.0012                 | Singlet-A | H-8->L+3 (90%)                                                             |
| 77  | 43204.193                     | 231.459016         | 0.0315                 | Singlet-A | H-16->LUMO (10%), H-10->L+1 (39%), H-1-<br>>L+8 (-25%)                     |
| 78  | 43306.6261                    | 230.911546         | 0                      | Singlet-A | H-7->L+4 (98%)                                                             |
| 79  | 43382.4427                    | 230.507998         | 0.0131                 | Singlet-A | H-17->LUMO (-17%), H-10->L+2 (40%)                                         |
| 80  | 43559.0794                    | 229.573263         | 0.0582                 | Singlet-A | H-5->L+6 (18%), H-1->L+7 (35%)                                             |
| 81  | 43581.663                     | 229.4543           | 0.0156                 | Singlet-A | H-12->L+1 (19%), H-11->L+2 (52%), H-9->L+3<br>(-13%)                       |
| 82  | 43589.7286                    | 229.411843         | 0.0073                 | Singlet-A | H-9->L+3 (82%)                                                             |
| 83  | 43692.9683                    | 228.869779         | 0.0106                 | Singlet-A | H-11->L+2 (-20%), H-10->L+1 (14%), H-1-<br>>L+8 (50%)                      |
| 84  | 44005.107                     | 227.246351         | 0.0044                 | Singlet-A | H-13->L+1 (-12%), H-12->L+1 (39%), H-11-<br>>L+3 (-22%)                    |
| 85  | 44184.1634                    | 226.325435         | 0.004                  | Singlet-A | H-12->L+1 (14%), H-11->L+3 (57%), H-11-<br>>L+4 (-11%)                     |
| 86  | 44492.2693                    | 224.758147         | 0.0041                 | Singlet-A | H-11->L+4 (61%)                                                            |
| 87  | 44575.345                     | 224.339262         | 0.0621                 | Singlet-A | H-11->L+4 (11%), H-2->L+8 (-16%), HOMO-<br>>L+13 (19%)                     |
| 88  | 44665.6797                    | 223.885544         | 0.0037                 | Singlet-A | H-9->L+7 (29%), H-8->L+10 (25%), H-1->L+10<br>(-21%)                       |
| 89  | 44695.5224                    | 223.736058         | 0.0109                 | Singlet-A | H-13->L+1 (28%), H-1->L+9 (11%)                                            |
| 90  | 44764.8866                    | 223.389374         | 0.0162                 | Singlet-A | H-13->L+1 (40%)                                                            |
| 91  | 44877.805                     | 222.827298         | 0.0043                 | Singlet-A | H-2->L+8 (32%), H-1->L+12 (-14%), HOMO-<br>>L+13 (17%)                     |
| 92  | 44900.3886                    | 222.715221         | 0.0018                 | Singlet-A | H-2->L+7 (70%)                                                             |
| 93  | 44977.8184                    | 222.331815         | 0.001                  | Singlet-A | H-6->L+5 (19%), H-1->L+9 (55%)                                             |
| 94  | 45231.0782                    | 221.086925         | 0.0002                 | Singlet-A | H-13->L+2 (-17%), H-12->L+2 (75%)                                          |
| 95  | 45299.6358                    | 220.752326         | 0.0008                 | Singlet-A | H-13->L+3 (-10%), H-12->L+3 (45%), H-10-<br>>L+3 (24%)                     |
| 96  | 45376.259                     | 220.37956          | 0.0014                 | Singlet-A | H-6->L+5 (40%), H-6->L+11 (-10%), H-1-<br>>L+11 (16%)                      |
| 97  | 45497.243                     | 219.793538         | 0.0024                 | Singlet-A | H-1->L+10 (66%)                                                            |
| 98  | 45579.5122                    | 219.396819         | 0.0047                 | Singlet-A | H-12->L+3 (-15%), H-10->L+3 (55%)                                          |
| 99  | 45639.1976                    | 219.1099           | 0.0265                 | Singlet-A | H-12->L+3 (-12%), H-12->L+4 (-14%), H-10-<br>>L+4 (-11%), HOMO->L+15 (17%) |
| 100 | 45668.2338                    | 218.970588         | 0.0075                 | Singlet-A | H-12->L+4 (-15%), H-3->L+8 (33%)                                           |

**Table S13:** Energy and composition of TD-DFT calculated transitions of **2b**

| No. | Energy<br>(cm <sup>-1</sup> ) | Wavelength<br>(nm) | Oscillator<br>Strength | Symmetry  | Major contributions                                                 |
|-----|-------------------------------|--------------------|------------------------|-----------|---------------------------------------------------------------------|
| 1   | 19780.884                     | 505.53858          | 0.0001                 | Singlet-A | HOMO->LUMO (99%)                                                    |
| 2   | 25121.1178                    | 398.071459         | 0.0224                 | Singlet-A | H-1->LUMO (98%)                                                     |
| 3   | 25228.3902                    | 396.378838         | 0.0008                 | Singlet-A | H-4->LUMO (17%), H-2->LUMO (82%)                                    |
| 4   | 26707.6213                    | 374.424959         | 0.0003                 | Singlet-A | HOMO->L+1 (96%)                                                     |
| 5   | 27290.7642                    | 366.424331         | 0.0664                 | Singlet-A | H-3->LUMO (86%)                                                     |
| 6   | 28057.8027                    | 356.407096         | 0.0016                 | Singlet-A | HOMO->L+3 (91%)                                                     |
| 7   | 28127.1669                    | 355.528164         | 0.0017                 | Singlet-A | HOMO->L+2 (71%), HOMO->L+4 (25%)                                    |
| 8   | 28286.8658                    | 353.520962         | 0.0006                 | Singlet-A | HOMO->L+2 (-25%), HOMO->L+4 (72%)                                   |
| 9   | 28498.991                     | 350.889615         | 0.0001                 | Singlet-A | H-4->LUMO (80%), H-2->LUMO (-17%)                                   |
| 10  | 29583.0077                    | 338.03189          | 0.0161                 | Singlet-A | H-5->LUMO (88%), H-3->LUMO (-10%)                                   |
| 11  | 31646.1882                    | 315.993824         | 0.011                  | Singlet-A | H-1->L+1 (92%)                                                      |
| 12  | 32243.0426                    | 310.144428         | 0.0061                 | Singlet-A | H-4->L+1 (10%), H-2->L+1 (76%)                                      |
| 13  | 32756.0147                    | 305.287444         | 0.0194                 | Singlet-A | H-1->L+4 (13%), HOMO->L+5 (67%)                                     |
| 14  | 33025.4058                    | 302.797188         | 0.0226                 | Singlet-A | H-1->L+2 (43%), H-1->L+4 (20%), HOMO->L+5 (-11%)                    |
| 15  | 33227.8523                    | 300.952343         | 0.0023                 | Singlet-A | H-1->L+3 (53%)                                                      |
| 16  | 33230.272                     | 300.930429         | 0.0046                 | Singlet-A | H-1->L+2 (40%), H-1->L+4 (-28%)                                     |
| 17  | 33503.6958                    | 298.474534         | 0.0081                 | Singlet-A | H-2->L+2 (20%), H-2->L+4 (31%), HOMO->L+6 (21%), HOMO->L+7 (-15%)   |
| 18  | 33795.6706                    | 295.895889         | 0.0013                 | Singlet-A | H-3->L+1 (55%), H-2->L+2 (11%), H-1->L+3 (-15%)                     |
| 19  | 33871.4872                    | 295.233567         | 0.1358                 | Singlet-A | H-2->L+3 (51%), H-1->L+4 (-26%)                                     |
| 20  | 34005.3762                    | 294.071148         | 0.0638                 | Singlet-A | H-3->L+1 (-21%), H-2->L+2 (46%), HOMO->L+6 (-17%)                   |
| 21  | 34458.6629                    | 290.202787         | 0                      | Singlet-A | H-3->L+3 (19%), H-2->L+4 (24%), H-1->L+3 (-20%), HOMO->L+6 (-14%)   |
| 22  | 35054.7107                    | 285.268365         | 0.0128                 | Singlet-A | H-4->L+1 (13%), H-3->L+2 (64%)                                      |
| 23  | 35103.1043                    | 284.87509          | 0.002                  | Singlet-A | H-4->L+1 (54%), H-3->L+2 (-10%), H-2->L+1 (-11%)                    |
| 24  | 35537.8402                    | 281.390201         | 0.1024                 | Singlet-A | H-4->L+1 (-12%), H-3->L+4 (62%), H-2->L+3 (-12%)                    |
| 25  | 35608.0109                    | 280.835681         | 0.0076                 | Singlet-A | H-11->LUMO (74%), H-6->LUMO (14%)                                   |
| 26  | 35837.0739                    | 279.040639         | 0                      | Singlet-A | HOMO->L+6 (21%), HOMO->L+7 (63%)                                    |
| 27  | 36051.6189                    | 277.380054         | 0.0094                 | Singlet-A | H-5->L+1 (46%), H-3->L+3 (17%)                                      |
| 28  | 36358.1117                    | 275.041787         | 0.0074                 | Singlet-A | H-5->L+1 (-32%), H-3->L+3 (32%), H-2->L+4 (-12%)                    |
| 29  | 36375.0494                    | 274.913716         | 0.0001                 | Singlet-A | H-7->LUMO (98%)                                                     |
| 30  | 36407.3118                    | 274.6701           | 0.0003                 | Singlet-A | H-11->LUMO (-12%), H-6->LUMO (84%)                                  |
| 31  | 36627.5027                    | 273.018886         | 0                      | Singlet-A | HOMO->L+8 (98%)                                                     |
| 32  | 36827.5296                    | 271.535998         | 0.0115                 | Singlet-A | H-4->L+2 (65%), H-4->L+4 (13%)                                      |
| 33  | 36921.8971                    | 270.841988         | 0                      | Singlet-A | H-8->LUMO (97%)                                                     |
| 34  | 36950.1267                    | 270.635066         | 0                      | Singlet-A | H-9->LUMO (99%)                                                     |
| 35  | 37096.1141                    | 269.570014         | 0.0117                 | Singlet-A | H-5->L+2 (12%), H-4->L+3 (50%)                                      |
| 36  | 37259.0392                    | 268.391247         | 0.012                  | Singlet-A | H-4->L+2 (-13%), H-4->L+4 (50%), H-1->L+5 (17%)                     |
| 37  | 37263.072                     | 268.362201         | 0.0009                 | Singlet-A | H-13->LUMO (-16%), H-12->LUMO (79%)                                 |
| 38  | 37544.5614                    | 266.350161         | 0.0008                 | Singlet-A | H-5->L+3 (-35%), H-1->L+5 (41%)                                     |
| 39  | 37561.4992                    | 266.230055         | 0.0371                 | Singlet-A | H-10->LUMO (-11%), H-5->L+2 (39%), H-4->L+3 (-12%), H-3->L+2 (-13%) |
| 40  | 37853.4739                    | 264.176546         | 0.0064                 | Singlet-A | H-5->L+4 (56%), H-1->L+6 (10%)                                      |
| 41  | 38113.9928                    | 262.370832         | 0.002                  | Singlet-A | H-13->LUMO (72%), H-12->LUMO (14%)                                  |
| 42  | 38417.2594                    | 260.299672         | 0.1954                 | Singlet-A | H-10->LUMO (-27%), H-5->L+2 (-12%), H-2->L+5 (33%)                  |
| 43  | 38576.1517                    | 259.227517         | 0.1526                 | Singlet-A | H-10->LUMO (29%), H-5->L+2 (13%), H-2->L+5 (33%)                    |
| 44  | 38610.8338                    | 258.994666         | 0.0125                 | Singlet-A | H-5->L+3 (29%), H-2->L+6 (-18%), H-1->L+5 (22%)                     |
| 45  | 39149.6158                    | 255.430348         | 0.0001                 | Singlet-A | HOMO->L+9 (95%)                                                     |
| 46  | 39164.9405                    | 255.330402         | 0.0038                 | Singlet-A | HOMO->L+10 (97%)                                                    |
| 47  | 39310.1213                    | 254.387412         | 0.1853                 | Singlet-A | H-5->L+4 (-15%), H-1->L+6 (40%), HOMO->L+12 (11%)                   |
| 48  | 39506.1154                    | 253.125368         | 0.0051                 | Singlet-A | H-3->L+5 (71%)                                                      |
| 49  | 39566.6074                    | 252.738374         | 0.0023                 | Singlet-A | HOMO->L+11 (91%)                                                    |
| 50  | 39844.064                     | 250.978414         | 0.0658                 | Singlet-A | H-5->L+3 (13%), H-4->L+4 (-12%), H-2->L+6 (28%), H-2->L+7 (-17%)    |



| No. | Energy<br>(cm <sup>-1</sup> ) | Wavelength<br>(nm) | Oscillator<br>Strength | Symmetry  | Major contributions                                                   |
|-----|-------------------------------|--------------------|------------------------|-----------|-----------------------------------------------------------------------|
| 51  | 40019.8941                    | 249.875724         | 0.0322                 | Singlet-A | H-4->L+5 (-11%), H-3->L+6 (16%), HOMO->L+12 (36%)                     |
| 52  | 40080.3861                    | 249.498595         | 0.0296                 | Singlet-A | H-1->L+6 (10%), H-1->L+7 (67%)                                        |
| 53  | 40542.545                     | 246.654471         | 0.0003                 | Singlet-A | H-2->L+6 (-12%), H-2->L+7 (-27%), H-1->L+8 (37%)                      |
| 54  | 40613.5222                    | 246.223412         | 0.0177                 | Singlet-A | H-3->L+6 (36%), H-3->L+7 (-16%), HOMO->L+12 (-13%)                    |
| 55  | 40672.4011                    | 245.866969         | 0                      | Singlet-A | H-1->L+8 (47%), HOMO->L+14 (-19%)                                     |
| 56  | 41370.8821                    | 241.7159           | 0.002                  | Singlet-A | H-1->L+8 (11%), HOMO->L+13 (17%), HOMO->L+14 (42%)                    |
| 57  | 41870.1427                    | 238.833674         | 0.0147                 | Singlet-A | H-5->L+6 (13%), H-4->L+5 (-20%), H-3->L+7 (31%)                       |
| 58  | 41950.7987                    | 238.374484         | 0.1357                 | Singlet-A | H-5->L+7 (10%), H-4->L+5 (39%), H-2->L+5 (-12%)                       |
| 59  | 42038.7138                    | 237.875974         | 0.0024                 | Singlet-A | H-5->L+5 (70%)                                                        |
| 60  | 42183.8946                    | 237.057296         | 0.0005                 | Singlet-A | H-11->L+1 (21%), H-6->L+1 (44%)                                       |
| 61  | 42331.495                     | 236.230731         | 0.0058                 | Singlet-A | H-7->L+1 (14%), H-2->L+8 (64%)                                        |
| 62  | 42386.3411                    | 235.925058         | 0.0115                 | Singlet-A | H-7->L+1 (36%), H-6->L+4 (13%), H-2->L+8 (-27%)                       |
| 63  | 42564.5909                    | 234.937064         | 0.0046                 | Singlet-A | H-11->L+1 (33%), H-6->L+1 (-12%)                                      |
| 64  | 42565.3974                    | 234.932612         | 0.0496                 | Singlet-A | H-16->LUMO (-28%), H-10->L+1 (38%)                                    |
| 65  | 42611.3714                    | 234.67914          | 0.0037                 | Singlet-A | H-4->L+6 (36%), H-2->L+6 (-15%)                                       |
| 66  | 42937.2216                    | 232.898162         | 0.0069                 | Singlet-A | H-17->LUMO (17%), H-11->L+1 (25%), H-10->L+2 (-21%), H-8->L+1 (12%)   |
| 67  | 43037.235                     | 232.356934         | 0.001                  | Singlet-A | H-9->L+1 (57%), H-9->L+3 (11%), H-8->L+4 (-16%), H-7->L+1 (11%)       |
| 68  | 43045.3006                    | 232.313397         | 0.003                  | Singlet-A | H-9->L+4 (-13%), H-8->L+1 (51%), H-8->L+3 (10%)                       |
| 69  | 43052.5597                    | 232.274227         | 0.0069                 | Singlet-A | H-14->LUMO (89%)                                                      |
| 70  | 43166.2846                    | 231.662282         | 0.0786                 | Singlet-A | H-5->L+6 (-16%), H-5->L+7 (10%), H-1->L+9 (49%)                       |
| 71  | 43240.4882                    | 231.264734         | 0.0003                 | Singlet-A | H-1->L+10 (88%)                                                       |
| 72  | 43329.2098                    | 230.791193         | 0.1332                 | Singlet-A | H-5->L+6 (19%), H-5->L+7 (-10%), H-1->L+9 (42%), HOMO->L+15 (10%)     |
| 73  | 43439.7085                    | 230.204123         | 0.009                  | Singlet-A | H-4->L+7 (39%), H-2->L+7 (-13%)                                       |
| 74  | 43559.8859                    | 229.569013         | 0.002                  | Singlet-A | H-15->LUMO (82%)                                                      |
| 75  | 43592.1483                    | 229.399109         | 0.0023                 | Singlet-A | H-7->L+4 (-13%), H-6->L+1 (23%), H-6->L+3 (-19%), H-3->L+8 (23%)      |
| 76  | 43606.6664                    | 229.322735         | 0.0005                 | Singlet-A | H-7->L+1 (31%), H-7->L+3 (-24%), H-6->L+4 (-24%)                      |
| 77  | 43630.8632                    | 229.195557         | 0.0004                 | Singlet-A | H-3->L+8 (69%)                                                        |
| 78  | 43808.3064                    | 228.267213         | 0.0104                 | Singlet-A | H-12->L+1 (24%), H-11->L+2 (54%), H-6->L+2 (10%)                      |
| 79  | 43941.3888                    | 227.575875         | 0.0051                 | Singlet-A | H-5->L+7 (-19%), H-3->L+6 (20%), H-3->L+7 (22%)                       |
| 80  | 44110.7664                    | 226.702023         | 0                      | Singlet-A | H-12->L+1 (30%), H-11->L+2 (-16%), H-11->L+4 (-19%)                   |
| 81  | 44176.9043                    | 226.362624         | 0.0056                 | Singlet-A | H-11->L+3 (45%), H-8->L+1 (-11%), H-8->L+3 (16%)                      |
| 82  | 44262.3997                    | 225.925392         | 0.0011                 | Singlet-A | H-9->L+1 (27%), H-9->L+3 (-27%), H-8->L+4 (26%)                       |
| 83  | 44300.308                     | 225.732065         | 0.0013                 | Singlet-A | H-11->L+3 (30%), H-9->L+4 (20%), H-8->L+1 (18%), H-8->L+3 (-18%)      |
| 84  | 44347.895                     | 225.489845         | 0.0011                 | Singlet-A | H-1->L+11 (73%)                                                       |
| 85  | 44433.3904                    | 225.055975         | 0.0024                 | Singlet-A | H-12->L+1 (14%), H-11->L+4 (41%), H-6->L+2 (-10%), H-4->L+8 (-13%)    |
| 86  | 44494.689                     | 224.745924         | 0.0002                 | Singlet-A | H-6->L+2 (-12%), H-4->L+8 (47%)                                       |
| 87  | 44548.7285                    | 224.473298         | 0.0377                 | Singlet-A | H-7->L+2 (51%), H-1->L+12 (10%), HOMO->L+13 (18%)                     |
| 88  | 44616.4795                    | 224.132431         | 0                      | Singlet-A | H-11->L+2 (-10%), H-11->L+4 (12%), H-6->L+2 (53%)                     |
| 89  | 44634.2238                    | 224.043327         | 0.0291                 | Singlet-A | H-7->L+2 (36%), H-1->L+12 (-12%), HOMO->L+13 (-22%)                   |
| 90  | 44722.9454                    | 223.598869         | 0.0069                 | Singlet-A | H-2->L+9 (25%)                                                        |
| 91  | 44740.6898                    | 223.510188         | 0.0009                 | Singlet-A | H-2->L+10 (49%)                                                       |
| 92  | 44747.1422                    | 223.477959         | 0.0009                 | Singlet-A | H-4->L+6 (11%), H-4->L+7 (14%), H-2->L+9 (27%)                        |
| 93  | 45017.3398                    | 222.136626         | 0.0184                 | Singlet-A | H-13->L+1 (61%), H-8->L+2 (-12%)                                      |
| 94  | 45116.5467                    | 221.64817          | 0.0024                 | Singlet-A | H-8->L+2 (51%)                                                        |
| 95  | 45117.3533                    | 221.644207         | 0.0003                 | Singlet-A | H-9->L+2 (-15%), H-2->L+9 (23%), H-2->L+11 (15%)                      |
| 96  | 45133.4845                    | 221.564989         | 0.0109                 | Singlet-A | H-8->L+2 (-21%), H-2->L+10 (26%)                                      |
| 97  | 45142.3566                    | 221.521443         | 0                      | Singlet-A | H-9->L+2 (75%)                                                        |
| 98  | 45152.8419                    | 221.470002         | 0.0097                 | Singlet-A | H-16->LUMO (10%), H-10->L+1 (13%), H-10->L+3 (49%)                    |
| 99  | 45301.249                     | 220.744466         | 0                      | Singlet-A | H-2->L+9 (-10%), H-2->L+11 (41%)                                      |
| 100 | 45417.3936                    | 220.179962         | 0.0337                 | Singlet-A | H-12->L+3 (10%), H-5->L+6 (-15%), HOMO->L+12 (-13%), HOMO->L+15 (24%) |

**Table S14:** Energy and composition of TD-DFT calculated transitions of **2b**

| No. | Energy<br>(cm <sup>-1</sup> ) | Wavelength<br>(nm) | Oscillator<br>Strength | Symmetry  | Major contributions                                                 |
|-----|-------------------------------|--------------------|------------------------|-----------|---------------------------------------------------------------------|
| 1   | 19780.884                     | 505.53858          | 0.0001                 | Singlet-A | HOMO->LUMO (99%)                                                    |
| 2   | 25121.1178                    | 398.071459         | 0.0224                 | Singlet-A | H-1->LUMO (98%)                                                     |
| 3   | 25228.3902                    | 396.378838         | 0.0008                 | Singlet-A | H-4->LUMO (17%), H-2->LUMO (82%)                                    |
| 4   | 26707.6213                    | 374.424959         | 0.0003                 | Singlet-A | HOMO->L+1 (96%)                                                     |
| 5   | 27290.7642                    | 366.424331         | 0.0664                 | Singlet-A | H-3->LUMO (86%)                                                     |
| 6   | 28057.8027                    | 356.407096         | 0.0016                 | Singlet-A | HOMO->L+3 (91%)                                                     |
| 7   | 28127.1669                    | 355.528164         | 0.0017                 | Singlet-A | HOMO->L+2 (71%), HOMO->L+4 (25%)                                    |
| 8   | 28286.8658                    | 353.520962         | 0.0006                 | Singlet-A | HOMO->L+2 (-25%), HOMO->L+4 (72%)                                   |
| 9   | 28498.991                     | 350.889615         | 0.0001                 | Singlet-A | H-4->LUMO (80%), H-2->LUMO (-17%)                                   |
| 10  | 29583.0077                    | 338.03189          | 0.0161                 | Singlet-A | H-5->LUMO (88%), H-3->LUMO (-10%)                                   |
| 11  | 31646.1882                    | 315.993824         | 0.011                  | Singlet-A | H-1->L+1 (92%)                                                      |
| 12  | 32243.0426                    | 310.144428         | 0.0061                 | Singlet-A | H-4->L+1 (10%), H-2->L+1 (76%)                                      |
| 13  | 32756.0147                    | 305.287444         | 0.0194                 | Singlet-A | H-1->L+4 (13%), HOMO->L+5 (67%)                                     |
| 14  | 33025.4058                    | 302.797188         | 0.0226                 | Singlet-A | H-1->L+2 (43%), H-1->L+4 (20%), HOMO->L+5 (-11%)                    |
| 15  | 33227.8523                    | 300.952343         | 0.0023                 | Singlet-A | H-1->L+3 (53%)                                                      |
| 16  | 33230.272                     | 300.930429         | 0.0046                 | Singlet-A | H-1->L+2 (40%), H-1->L+4 (-28%)                                     |
| 17  | 33503.6958                    | 298.474534         | 0.0081                 | Singlet-A | H-2->L+2 (20%), H-2->L+4 (31%), HOMO->L+6 (21%), HOMO->L+7 (-15%)   |
| 18  | 33795.6706                    | 295.895889         | 0.0013                 | Singlet-A | H-3->L+1 (55%), H-2->L+2 (11%), H-1->L+3 (-15%)                     |
| 19  | 33871.4872                    | 295.233567         | 0.1358                 | Singlet-A | H-2->L+3 (51%), H-1->L+4 (-26%)                                     |
| 20  | 34005.3762                    | 294.071148         | 0.0638                 | Singlet-A | H-3->L+1 (-21%), H-2->L+2 (46%), HOMO->L+6 (-17%)                   |
| 21  | 34458.6629                    | 290.202787         | 0                      | Singlet-A | H-3->L+3 (19%), H-2->L+4 (24%), H-1->L+3 (-20%), HOMO->L+6 (-14%)   |
| 22  | 35054.7107                    | 285.268365         | 0.0128                 | Singlet-A | H-4->L+1 (13%), H-3->L+2 (64%)                                      |
| 23  | 35103.1043                    | 284.87509          | 0.002                  | Singlet-A | H-4->L+1 (54%), H-3->L+2 (-10%), H-2->L+1 (-11%)                    |
| 24  | 35537.8402                    | 281.390201         | 0.1024                 | Singlet-A | H-4->L+1 (-12%), H-3->L+4 (62%), H-2->L+3 (-12%)                    |
| 25  | 35608.0109                    | 280.835681         | 0.0076                 | Singlet-A | H-11->LUMO (74%), H-6->LUMO (14%)                                   |
| 26  | 35837.0739                    | 279.040639         | 0                      | Singlet-A | HOMO->L+6 (21%), HOMO->L+7 (63%)                                    |
| 27  | 36051.6189                    | 277.380054         | 0.0094                 | Singlet-A | H-5->L+1 (46%), H-3->L+3 (17%)                                      |
| 28  | 36358.1117                    | 275.041787         | 0.0074                 | Singlet-A | H-5->L+1 (-32%), H-3->L+3 (32%), H-2->L+4 (-12%)                    |
| 29  | 36375.0494                    | 274.913716         | 0.0001                 | Singlet-A | H-7->LUMO (98%)                                                     |
| 30  | 36407.3118                    | 274.6701           | 0.0003                 | Singlet-A | H-11->LUMO (-12%), H-6->LUMO (84%)                                  |
| 31  | 36627.5027                    | 273.018886         | 0                      | Singlet-A | HOMO->L+8 (98%)                                                     |
| 32  | 36827.5296                    | 271.535998         | 0.0115                 | Singlet-A | H-4->L+2 (65%), H-4->L+4 (13%)                                      |
| 33  | 36921.8971                    | 270.841988         | 0                      | Singlet-A | H-8->LUMO (97%)                                                     |
| 34  | 36950.1267                    | 270.635066         | 0                      | Singlet-A | H-9->LUMO (99%)                                                     |
| 35  | 37096.1141                    | 269.570014         | 0.0117                 | Singlet-A | H-5->L+2 (12%), H-4->L+3 (50%)                                      |
| 36  | 37259.0392                    | 268.391247         | 0.012                  | Singlet-A | H-4->L+2 (-13%), H-4->L+4 (50%), H-1->L+5 (17%)                     |
| 37  | 37263.072                     | 268.362201         | 0.0009                 | Singlet-A | H-13->LUMO (-16%), H-12->LUMO (79%)                                 |
| 38  | 37544.5614                    | 266.350161         | 0.0008                 | Singlet-A | H-5->L+3 (-35%), H-1->L+5 (41%)                                     |
| 39  | 37561.4992                    | 266.230055         | 0.0371                 | Singlet-A | H-10->LUMO (-11%), H-5->L+2 (39%), H-4->L+3 (-12%), H-3->L+2 (-13%) |
| 40  | 37853.4739                    | 264.176546         | 0.0064                 | Singlet-A | H-5->L+4 (56%), H-1->L+6 (10%)                                      |
| 41  | 38113.9928                    | 262.370832         | 0.002                  | Singlet-A | H-13->LUMO (72%), H-12->LUMO (14%)                                  |
| 42  | 38417.2594                    | 260.299672         | 0.1954                 | Singlet-A | H-10->LUMO (-27%), H-5->L+2 (-12%), H-2->L+5 (33%)                  |
| 43  | 38576.1517                    | 259.227517         | 0.1526                 | Singlet-A | H-10->LUMO (29%), H-5->L+2 (13%), H-2->L+5 (33%)                    |
| 44  | 38610.8338                    | 258.994666         | 0.0125                 | Singlet-A | H-5->L+3 (29%), H-2->L+6 (-18%), H-1->L+5 (22%)                     |
| 45  | 39149.6158                    | 255.430348         | 0.0001                 | Singlet-A | HOMO->L+9 (95%)                                                     |
| 46  | 39164.9405                    | 255.330402         | 0.0038                 | Singlet-A | HOMO->L+10 (97%)                                                    |
| 47  | 39310.1213                    | 254.387412         | 0.1853                 | Singlet-A | H-5->L+4 (-15%), H-1->L+6 (40%), HOMO->L+12 (11%)                   |
| 48  | 39506.1154                    | 253.125368         | 0.0051                 | Singlet-A | H-3->L+5 (71%)                                                      |
| 49  | 39566.6074                    | 252.738374         | 0.0023                 | Singlet-A | HOMO->L+11 (91%)                                                    |
| 50  | 39844.064                     | 250.978414         | 0.0658                 | Singlet-A | H-5->L+3 (13%), H-4->L+4 (-12%), H-2->L+6 (28%), H-2->L+7 (-17%)    |

| No. | Energy<br>(cm <sup>-1</sup> ) | Wavelength<br>(nm) | Oscillator<br>Strength | Symmetry  | Major contributions                                                   |
|-----|-------------------------------|--------------------|------------------------|-----------|-----------------------------------------------------------------------|
| 51  | 40019.8941                    | 249.875724         | 0.0322                 | Singlet-A | H-4->L+5 (-11%), H-3->L+6 (16%), HOMO->L+12 (36%)                     |
| 52  | 40080.3861                    | 249.498595         | 0.0296                 | Singlet-A | H-1->L+6 (10%), H-1->L+7 (67%)                                        |
| 53  | 40542.545                     | 246.654471         | 0.0003                 | Singlet-A | H-2->L+6 (-12%), H-2->L+7 (-27%), H-1->L+8 (37%)                      |
| 54  | 40613.5222                    | 246.223412         | 0.0177                 | Singlet-A | H-3->L+6 (36%), H-3->L+7 (-16%), HOMO->L+12 (-13%)                    |
| 55  | 40672.4011                    | 245.866969         | 0                      | Singlet-A | H-1->L+8 (47%), HOMO->L+14 (-19%)                                     |
| 56  | 41370.8821                    | 241.7159           | 0.002                  | Singlet-A | H-1->L+8 (11%), HOMO->L+13 (17%), HOMO->L+14 (42%)                    |
| 57  | 41870.1427                    | 238.833674         | 0.0147                 | Singlet-A | H-5->L+6 (13%), H-4->L+5 (-20%), H-3->L+7 (31%)                       |
| 58  | 41950.7987                    | 238.374484         | 0.1357                 | Singlet-A | H-5->L+7 (10%), H-4->L+5 (39%), H-2->L+5 (-12%)                       |
| 59  | 42038.7138                    | 237.875974         | 0.0024                 | Singlet-A | H-5->L+5 (70%)                                                        |
| 60  | 42183.8946                    | 237.057296         | 0.0005                 | Singlet-A | H-11->L+1 (21%), H-6->L+1 (44%)                                       |
| 61  | 42331.495                     | 236.230731         | 0.0058                 | Singlet-A | H-7->L+1 (14%), H-2->L+8 (64%)                                        |
| 62  | 42386.3411                    | 235.925058         | 0.0115                 | Singlet-A | H-7->L+1 (36%), H-6->L+4 (13%), H-2->L+8 (-27%)                       |
| 63  | 42564.5909                    | 234.937064         | 0.0046                 | Singlet-A | H-11->L+1 (33%), H-6->L+1 (-12%)                                      |
| 64  | 42565.3974                    | 234.932612         | 0.0496                 | Singlet-A | H-16->LUMO (-28%), H-10->L+1 (38%)                                    |
| 65  | 42611.3714                    | 234.67914          | 0.0037                 | Singlet-A | H-4->L+6 (36%), H-2->L+6 (-15%)                                       |
| 66  | 42937.2216                    | 232.898162         | 0.0069                 | Singlet-A | H-17->LUMO (17%), H-11->L+1 (25%), H-10->L+2 (-21%), H-8->L+1 (12%)   |
| 67  | 43037.235                     | 232.356934         | 0.001                  | Singlet-A | H-9->L+1 (57%), H-9->L+3 (11%), H-8->L+4 (-16%), H-7->L+1 (11%)       |
| 68  | 43045.3006                    | 232.313397         | 0.003                  | Singlet-A | H-9->L+4 (-13%), H-8->L+1 (51%), H-8->L+3 (10%)                       |
| 69  | 43052.5597                    | 232.274227         | 0.0069                 | Singlet-A | H-14->LUMO (89%)                                                      |
| 70  | 43166.2846                    | 231.662282         | 0.0786                 | Singlet-A | H-5->L+6 (-16%), H-5->L+7 (10%), H-1->L+9 (49%)                       |
| 71  | 43240.4882                    | 231.264734         | 0.0003                 | Singlet-A | H-1->L+10 (88%)                                                       |
| 72  | 43329.2098                    | 230.791193         | 0.1332                 | Singlet-A | H-5->L+6 (19%), H-5->L+7 (-10%), H-1->L+9 (42%), HOMO->L+15 (10%)     |
| 73  | 43439.7085                    | 230.204123         | 0.009                  | Singlet-A | H-4->L+7 (39%), H-2->L+7 (-13%)                                       |
| 74  | 43559.8859                    | 229.569013         | 0.002                  | Singlet-A | H-15->LUMO (82%)                                                      |
| 75  | 43592.1483                    | 229.399109         | 0.0023                 | Singlet-A | H-7->L+4 (-13%), H-6->L+1 (23%), H-6->L+3 (-19%), H-3->L+8 (23%)      |
| 76  | 43606.6664                    | 229.322735         | 0.0005                 | Singlet-A | H-7->L+1 (31%), H-7->L+3 (-24%), H-6->L+4 (-24%)                      |
| 77  | 43630.8632                    | 229.195557         | 0.0004                 | Singlet-A | H-3->L+8 (69%)                                                        |
| 78  | 43808.3064                    | 228.267213         | 0.0104                 | Singlet-A | H-12->L+1 (24%), H-11->L+2 (54%), H-6->L+2 (10%)                      |
| 79  | 43941.3888                    | 227.575875         | 0.0051                 | Singlet-A | H-5->L+7 (-19%), H-3->L+6 (20%), H-3->L+7 (22%)                       |
| 80  | 44110.7664                    | 226.702023         | 0                      | Singlet-A | H-12->L+1 (30%), H-11->L+2 (-16%), H-11->L+4 (-19%)                   |
| 81  | 44176.9043                    | 226.362624         | 0.0056                 | Singlet-A | H-11->L+3 (45%), H-8->L+1 (-11%), H-8->L+3 (16%)                      |
| 82  | 44262.3997                    | 225.925392         | 0.0011                 | Singlet-A | H-9->L+1 (27%), H-9->L+3 (-27%), H-8->L+4 (26%)                       |
| 83  | 44300.308                     | 225.732065         | 0.0013                 | Singlet-A | H-11->L+3 (30%), H-9->L+4 (20%), H-8->L+1 (18%), H-8->L+3 (-18%)      |
| 84  | 44347.895                     | 225.489845         | 0.0011                 | Singlet-A | H-1->L+11 (73%)                                                       |
| 85  | 44433.3904                    | 225.055975         | 0.0024                 | Singlet-A | H-12->L+1 (14%), H-11->L+4 (41%), H-6->L+2 (-10%), H-4->L+8 (-13%)    |
| 86  | 44494.689                     | 224.745924         | 0.0002                 | Singlet-A | H-6->L+2 (-12%), H-4->L+8 (47%)                                       |
| 87  | 44548.7285                    | 224.473298         | 0.0377                 | Singlet-A | H-7->L+2 (51%), H-1->L+12 (10%), HOMO->L+13 (18%)                     |
| 88  | 44616.4795                    | 224.132431         | 0                      | Singlet-A | H-11->L+2 (-10%), H-11->L+4 (12%), H-6->L+2 (53%)                     |
| 89  | 44634.2238                    | 224.043327         | 0.0291                 | Singlet-A | H-7->L+2 (36%), H-1->L+12 (-12%), HOMO->L+13 (-22%)                   |
| 90  | 44722.9454                    | 223.598869         | 0.0069                 | Singlet-A | H-2->L+9 (25%)                                                        |
| 91  | 44740.6898                    | 223.510188         | 0.0009                 | Singlet-A | H-2->L+10 (49%)                                                       |
| 92  | 44747.1422                    | 223.477959         | 0.0009                 | Singlet-A | H-4->L+6 (11%), H-4->L+7 (14%), H-2->L+9 (27%)                        |
| 93  | 45017.3398                    | 222.136626         | 0.0184                 | Singlet-A | H-13->L+1 (61%), H-8->L+2 (-12%)                                      |
| 94  | 45116.5467                    | 221.64817          | 0.0024                 | Singlet-A | H-8->L+2 (51%)                                                        |
| 95  | 45117.3533                    | 221.644207         | 0.0003                 | Singlet-A | H-9->L+2 (-15%), H-2->L+9 (23%), H-2->L+11 (15%)                      |
| 96  | 45133.4845                    | 221.564989         | 0.0109                 | Singlet-A | H-8->L+2 (-21%), H-2->L+10 (26%)                                      |
| 97  | 45142.3566                    | 221.521443         | 0                      | Singlet-A | H-9->L+2 (75%)                                                        |
| 98  | 45152.8419                    | 221.470002         | 0.0097                 | Singlet-A | H-16->LUMO (10%), H-10->L+1 (13%), H-10->L+3 (49%)                    |
| 99  | 45301.249                     | 220.744466         | 0                      | Singlet-A | H-2->L+9 (-10%), H-2->L+11 (41%)                                      |
| 100 | 45417.3936                    | 220.179962         | 0.0337                 | Singlet-A | H-12->L+3 (10%), H-5->L+6 (-15%), HOMO->L+12 (-13%), HOMO->L+15 (24%) |

**Table S15:** Energy and composition of TD-DFT calculated transitions of **3a**

| No. | Energy<br>(cm <sup>-1</sup> ) | Wavelength<br>(nm) | Oscillator<br>Strength | Symmetry  | Major contributions                                              |
|-----|-------------------------------|--------------------|------------------------|-----------|------------------------------------------------------------------|
| 1   | 18005.6454                    | 555.381368         | 0.0002                 | Singlet-A | HOMO->LUMO (98%)                                                 |
| 2   | 22065.0619                    | 453.205164         | 0.0095                 | Singlet-A | H-1->LUMO (99%)                                                  |
| 3   | 22365.1022                    | 447.125164         | 0.0002                 | Singlet-A | H-4->LUMO (23%), H-2->LUMO (76%)                                 |
| 4   | 24239.5477                    | 412.548952         | 0.0004                 | Singlet-A | H-4->LUMO (75%), H-2->LUMO (-23%)                                |
| 5   | 25680.0638                    | 389.407132         | 0.0431                 | Singlet-A | H-5->LUMO (33%), H-3->LUMO (61%)                                 |
| 6   | 26265.6264                    | 380.725738         | 0.0005                 | Singlet-A | HOMO->L+1 (98%)                                                  |
| 7   | 26355.1546                    | 379.432417         | 0.0232                 | Singlet-A | H-5->LUMO (61%), H-3->LUMO (-37%)                                |
| 8   | 27176.2326                    | 367.96859          | 0.0404                 | Singlet-A | HOMO->L+3 (95%)                                                  |
| 9   | 27245.5968                    | 367.031784         | 0.005                  | Singlet-A | HOMO->L+2 (90%)                                                  |
| 10  | 28183.6261                    | 354.815948         | 0.0084                 | Singlet-A | HOMO->L+4 (90%)                                                  |
| 11  | 29808.8445                    | 335.470904         | 0.0066                 | Singlet-A | H-1->L+1 (96%)                                                   |
| 12  | 30441.9941                    | 328.493593         | 0.0007                 | Singlet-A | H-2->L+1 (79%), H-1->L+2 (-12%)                                  |
| 13  | 30950.9334                    | 323.092033         | 0.0036                 | Singlet-A | H-1->L+2 (81%)                                                   |
| 14  | 31420.3514                    | 318.26506          | 0.0277                 | Singlet-A | H-1->L+3 (78%)                                                   |
| 15  | 31638.9291                    | 316.066323         | 0.0156                 | Singlet-A | H-4->L+3 (10%), H-2->L+3 (46%), H-1->L+4 (-37%)                  |
| 16  | 31739.7491                    | 315.062352         | 0.0004                 | Singlet-A | H-2->L+2 (81%)                                                   |
| 17  | 32322.892                     | 309.378257         | 0.0823                 | Singlet-A | H-2->L+3 (31%), H-1->L+4 (52%)                                   |
| 18  | 32448.7154                    | 308.17861          | 0.0083                 | Singlet-A | H-4->L+1 (81%), H-2->L+1 (-10%)                                  |
| 19  | 32845.5429                    | 304.455312         | 0.0834                 | Singlet-A | H-4->L+4 (11%), H-2->L+4 (69%)                                   |
| 20  | 33239.1442                    | 300.850105         | 0.0003                 | Singlet-A | H-5->L+1 (40%), H-4->L+2 (10%), H-3->L+1 (37%)                   |
| 21  | 33581.1256                    | 297.786326         | 0.007                  | Singlet-A | H-4->L+3 (45%), HOMO->L+5 (38%)                                  |
| 22  | 33771.4738                    | 296.107895         | 0.0272                 | Singlet-A | H-5->L+3 (16%), H-4->L+2 (57%)                                   |
| 23  | 33868.261                     | 295.261691         | 0.0065                 | Singlet-A | H-5->L+2 (44%), H-3->L+2 (16%), HOMO->L+5 (-19%)                 |
| 24  | 33968.2744                    | 294.392346         | 0.0068                 | Singlet-A | H-4->L+4 (-15%), H-3->L+1 (-18%), HOMO->L+6 (49%)                |
| 25  | 34125.5536                    | 293.035539         | 0.0375                 | Singlet-A | H-5->L+2 (18%), H-5->L+4 (13%), H-4->L+3 (-17%), HOMO->L+5 (29%) |
| 26  | 34148.9438                    | 292.834825         | 0.0027                 | Singlet-A | H-5->L+1 (-35%), H-3->L+1 (40%), HOMO->L+6 (15%)                 |
| 27  | 34326.387                     | 291.321076         | 0.0001                 | Singlet-A | H-5->L+3 (-14%), H-4->L+2 (10%), H-4->L+4 (35%), H-2->L+4 (-14%) |
| 28  | 34638.5258                    | 288.695889         | 0.0142                 | Singlet-A | H-9->LUMO (72%), H-3->L+3 (11%)                                  |
| 29  | 34773.2213                    | 287.577614         | 0.0009                 | Singlet-A | H-9->LUMO (-13%), H-5->L+3 (-10%), H-3->L+3 (64%)                |
| 30  | 34832.1002                    | 287.091503         | 0.0084                 | Singlet-A | H-6->LUMO (68%), H-3->L+2 (-13%)                                 |
| 31  | 35076.4878                    | 285.091257         | 0.0839                 | Singlet-A | H-6->LUMO (-15%), H-3->L+4 (60%)                                 |
| 32  | 35204.7309                    | 284.052732         | 0.0297                 | Singlet-A | H-6->LUMO (10%), H-5->L+2 (-14%), H-5->L+4 (14%), H-3->L+2 (51%) |
| 33  | 35441.8595                    | 282.152238         | 0.0214                 | Singlet-A | H-5->L+3 (34%), H-4->L+4 (11%), H-1->L+5 (11%), HOMO->L+6 (21%)  |
| 34  | 35645.1126                    | 280.543369         | 0.0293                 | Singlet-A | H-5->L+4 (41%), H-3->L+4 (-27%)                                  |
| 35  | 36450.0595                    | 274.347975         | 0.0014                 | Singlet-A | H-11->LUMO (88%)                                                 |
| 36  | 36676.7029                    | 272.652644         | 0.0014                 | Singlet-A | H-8->LUMO (77%), H-7->LUMO (-14%)                                |
| 37  | 37171.9307                    | 269.020194         | 0.0011                 | Singlet-A | H-10->LUMO (95%)                                                 |
| 38  | 37964.7792                    | 263.402032         | 0.0096                 | Singlet-A | H-2->L+6 (35%), H-1->L+5 (56%)                                   |
| 39  | 38022.045                     | 263.005317         | 0.2639                 | Singlet-A | H-8->LUMO (11%), H-7->LUMO (44%), H-1->L+6 (15%)                 |
| 40  | 38104.3141                    | 262.437476         | 0.0796                 | Singlet-A | H-7->LUMO (-15%), H-2->L+5 (42%), H-1->L+6 (27%)                 |
| 41  | 38332.5706                    | 260.874756         | 0.0017                 | Singlet-A | HOMO->L+7 (95%)                                                  |
| 42  | 38893.1298                    | 257.114819         | 0.4613                 | Singlet-A | H-2->L+5 (-24%), H-1->L+6 (37%), HOMO->L+8 (-14%)                |
| 43  | 39114.9338                    | 255.656831         | 0.0896                 | Singlet-A | H-2->L+6 (45%), H-1->L+5 (-20%)                                  |
| 44  | 39521.44                      | 253.027218         | 0.0023                 | Singlet-A | H-4->L+10 (10%), HOMO->L+9 (24%), HOMO->L+10 (42%)               |
| 45  | 40344.9378                    | 247.862571         | 0.0587                 | Singlet-A | H-4->L+5 (58%), HOMO->L+8 (-22%)                                 |
| 46  | 40418.3347                    | 247.412469         | 0.138                  | Singlet-A | H-4->L+5 (30%), H-2->L+5 (-13%), HOMO->L+8 (27%)                 |
| 47  | 40515.9285                    | 246.816508         | 0.0011                 | Singlet-A | H-4->L+6 (40%), H-3->L+5 (41%)                                   |
| 48  | 40716.7619                    | 245.599098         | 0                      | Singlet-A | H-4->L+6 (-42%), H-3->L+5 (44%)                                  |
| 49  | 40990.9923                    | 243.956036         | 0.0117                 | Singlet-A | H-5->L+6 (12%), H-3->L+6 (74%)                                   |
| 50  | 41102.2976                    | 243.295402         | 0.0127                 | Singlet-A | H-12->LUMO (73%)                                                 |

| No. | Energy<br>(cm <sup>-1</sup> ) | Wavelength<br>(nm) | Oscillator<br>Strength | Symmetry  | Major contributions                                                 |
|-----|-------------------------------|--------------------|------------------------|-----------|---------------------------------------------------------------------|
| 51  | 41231.3472                    | 242.533914         | 0.0048                 | Singlet-A | H-13->LUMO (88%)                                                    |
| 52  | 41437.02                      | 241.330096         | 0.0163                 | Singlet-A | H-12->LUMO (-10%), H-5->L+5 (74%)                                   |
| 53  | 41549.9384                    | 240.674244         | 0.0053                 | Singlet-A | H-5->L+6 (39%), H-5->L+10 (-10%), H-1->L+7 (15%)                    |
| 54  | 41608.0107                    | 240.338335         | 0.0053                 | Singlet-A | H-5->L+6 (39%), H-5->L+9 (11%), H-5->L+10 (14%)                     |
| 55  | 41626.5616                    | 240.231228         | 0.0114                 | Singlet-A | H-4->L+9 (13%), H-4->L+10 (29%), H-2->L+10 (15%)                    |
| 56  | 41909.6642                    | 238.60845          | 0.0021                 | Singlet-A | H-1->L+7 (70%)                                                      |
| 57  | 42629.1157                    | 234.581455         | 0.0014                 | Singlet-A | H-9->L+1 (18%), H-2->L+7 (58%)                                      |
| 58  | 42696.8667                    | 234.209223         | 0.0141                 | Singlet-A | H-9->L+1 (69%), H-2->L+7 (-20%)                                     |
| 59  | 42954.9659                    | 232.801954         | 0.0056                 | Singlet-A | H-6->L+1 (85%)                                                      |
| 60  | 43659.8994                    | 229.04313          | 0.0518                 | Singlet-A | H-16->LUMO (-14%), H-7->L+1 (53%)                                   |
| 61  | 43727.6504                    | 228.688254         | 0.0161                 | Singlet-A | H-9->L+2 (68%), H-6->L+1 (-10%)                                     |
| 62  | 43826.8573                    | 228.170593         | 0.0097                 | Singlet-A | H-7->L+2 (34%), H-4->L+7 (-22%), H-2->L+7 (14%)                     |
| 63  | 43907.5133                    | 227.751454         | 0.0004                 | Singlet-A | H-9->L+3 (77%)                                                      |
| 64  | 44034.1432                    | 227.096505         | 0.0139                 | Singlet-A | H-6->L+2 (80%)                                                      |
| 65  | 44158.3534                    | 226.457719         | 0.0129                 | Singlet-A | H-6->L+3 (67%)                                                      |
| 66  | 44381.7706                    | 225.317735         | 0.0025                 | Singlet-A | H-11->L+3 (22%), H-9->L+4 (59%)                                     |
| 67  | 44454.361                     | 224.949809         | 0.0657                 | Singlet-A | HOMO->L+9 (32%), HOMO->L+10 (-18%)                                  |
| 68  | 44589.0565                    | 224.270276         | 0.012                  | Singlet-A | H-8->L+1 (77%)                                                      |
| 69  | 44685.8437                    | 223.784518         | 0.0038                 | Singlet-A | H-11->L+1 (86%)                                                     |
| 70  | 44767.3062                    | 223.3773           | 0.0118                 | Singlet-A | H-6->L+4 (36%), H-1->L+8 (35%)                                      |
| 71  | 44779.4046                    | 223.316949         | 0.0136                 | Singlet-A | H-4->L+8 (15%), H-2->L+8 (27%), HOMO->L+11 (-11%)                   |
| 72  | 44847.1557                    | 222.979581         | 0.0015                 | Singlet-A | H-14->LUMO (82%)                                                    |
| 73  | 44968.9462                    | 222.37568          | 0.0003                 | Singlet-A | H-10->L+1 (46%), H-6->L+4 (14%), H-4->L+7 (-10%)                    |
| 74  | 45111.7074                    | 221.671947         | 0.0202                 | Singlet-A | H-10->L+1 (32%), H-7->L+2 (11%), H-4->L+7 (32%)                     |
| 75  | 45260.1144                    | 220.945089         | 0.0171                 | Singlet-A | H-5->L+7 (46%), H-3->L+7 (27%)                                      |
| 76  | 45342.3835                    | 220.544207         | 0.0095                 | Singlet-A | H-6->L+4 (-21%), H-1->L+8 (26%)                                     |
| 77  | 45470.6266                    | 219.922195         | 0.0243                 | Singlet-A | H-4->L+8 (14%), HOMO->L+8 (-10%), HOMO->L+11 (22%)                  |
| 78  | 45584.3515                    | 219.373528         | 0.0001                 | Singlet-A | H-11->L+2 (73%), H-8->L+2 (11%)                                     |
| 79  | 45681.1387                    | 218.908729         | 0.0402                 | Singlet-A | H-7->L+3 (76%)                                                      |
| 80  | 45762.6013                    | 218.519047         | 0.0017                 | Singlet-A | H-11->L+2 (-12%), H-8->L+2 (69%)                                    |
| 81  | 45901.3296                    | 217.858613         | 0.0359                 | Singlet-A | H-11->L+3 (54%), H-9->L+4 (-16%)                                    |
| 82  | 46069.9006                    | 217.061462         | 0.0142                 | Singlet-A | H-10->L+2 (-13%), H-8->L+3 (47%)                                    |
| 83  | 46130.3926                    | 216.776824         | 0.0068                 | Singlet-A | H-5->L+7 (-27%), H-3->L+7 (50%)                                     |
| 84  | 46169.9141                    | 216.591263         | 0.0001                 | Singlet-A | H-11->L+4 (43%), H-7->L+4 (-33%)                                    |
| 85  | 46222.3405                    | 216.3456           | 0.0022                 | Singlet-A | H-10->L+2 (73%)                                                     |
| 86  | 46474.7938                    | 215.170401         | 0.0007                 | Singlet-A | H-11->L+4 (28%), H-7->L+4 (59%)                                     |
| 87  | 46558.676                     | 214.78274          | 0.0176                 | Singlet-A | H-11->L+4 (-10%), H-10->L+3 (29%), H-8->L+4 (23%), H-2->L+9 (-16%)  |
| 88  | 46586.099                     | 214.656307         | 0.0025                 | Singlet-A | H-8->L+3 (10%), H-1->L+9 (39%)                                      |
| 89  | 46782.8997                    | 213.753317         | 0.011                  | Singlet-A | H-10->L+3 (14%), H-5->L+8 (12%), H-2->L+9 (22%), HOMO->L+12 (13%)   |
| 90  | 46936.9526                    | 213.051752         | 0.0039                 | Singlet-A | H-1->L+10 (49%), HOMO->L+13 (11%)                                   |
| 91  | 47041.8054                    | 212.576875         | 0.0024                 | Singlet-A | H-10->L+3 (-37%), H-8->L+4 (50%)                                    |
| 92  | 47415.2427                    | 210.902643         | 0.001                  | Singlet-A | H-10->L+4 (81%)                                                     |
| 93  | 47477.3478                    | 210.626761         | 0.0116                 | Singlet-A | H-5->L+8 (36%), H-4->L+10 (19%), H-2->L+9 (-17%)                    |
| 94  | 47579.781                     | 210.173309         | 0.0092                 | Singlet-A | H-17->LUMO (54%), H-15->LUMO (21%)                                  |
| 95  | 47606.3974                    | 210.055802         | 0.0199                 | Singlet-A | H-4->L+8 (31%), H-2->L+8 (-29%), H-1->L+10 (18%)                    |
| 96  | 47738.6733                    | 209.473773         | 0.0123                 | Singlet-A | H-17->LUMO (-13%), H-15->LUMO (71%)                                 |
| 97  | 47824.9752                    | 209.09577          | 0.0001                 | Singlet-A | H-4->L+9 (-24%), H-2->L+10 (45%)                                    |
| 98  | 48784.7816                    | 204.981957         | 0.0025                 | Singlet-A | H-16->LUMO (64%), H-7->L+1 (16%)                                    |
| 99  | 48807.3653                    | 204.88711          | 0.0235                 | Singlet-A | H-5->L+8 (11%), H-4->L+9 (27%), H-4->L+10 (-14%), HOMO->L+12 (-23%) |
| 100 | 49313.0784                    | 202.785961         | 0.022                  | Singlet-A | H-12->L+1 (89%)                                                     |

**Table S16:** Energy and composition of TD-DFT calculated transitions of **3b**

| No. | Energy<br>(cm <sup>-1</sup> ) | Wavelength<br>(nm) | Oscillator<br>Strength | Symmetry  | Major contributions                                                                |
|-----|-------------------------------|--------------------|------------------------|-----------|------------------------------------------------------------------------------------|
| 1   | 19968.8125                    | 500.780906         | 0.0003                 | Singlet-A | HOMO->LUMO (98%)                                                                   |
| 2   | 24206.4787                    | 413.112544         | 0.0198                 | Singlet-A | H-1->LUMO (98%)                                                                    |
| 3   | 24283.9085                    | 411.795326         | 0.0005                 | Singlet-A | H-3->LUMO (27%), H-2->LUMO (72%)                                                   |
| 4   | 26318.0528                    | 379.96732          | 0.0009                 | Singlet-A | H-3->LUMO (70%), H-2->LUMO (-27%)                                                  |
| 5   | 26796.3429                    | 373.185253         | 0.029                  | Singlet-A | HOMO->L+1 (-34%), HOMO->L+2 (63%)                                                  |
| 6   | 27159.2949                    | 368.198072         | 0.0708                 | Singlet-A | H-5->LUMO (29%), H-4->LUMO (63%)                                                   |
| 7   | 27295.6035                    | 366.359366         | 0.0081                 | Singlet-A | HOMO->L+1 (64%), HOMO->L+2 (32%)                                                   |
| 8   | 27681.9458                    | 361.246283         | 0.0019                 | Singlet-A | HOMO->L+3 (87%)                                                                    |
| 9   | 28441.7253                    | 351.596111         | 0.0102                 | Singlet-A | H-5->LUMO (68%), H-4->LUMO (-29%)                                                  |
| 10  | 28671.5949                    | 348.777249         | 0.0143                 | Singlet-A | HOMO->L+4 (83%)                                                                    |
| 11  | 30819.4642                    | 324.470275         | 0.0297                 | Singlet-A | H-1->L+1 (85%)                                                                     |
| 12  | 31237.2622                    | 320.130488         | 0.0128                 | Singlet-A | H-2->L+1 (38%), H-2->L+2 (-27%), H-1->L+3 (15%)                                    |
| 13  | 31418.7382                    | 318.2814           | 0.0038                 | Singlet-A | H-1->L+1 (11%), H-1->L+2 (68%)                                                     |
| 14  | 31482.4565                    | 317.637221         | 0.0034                 | Singlet-A | H-2->L+1 (43%), H-2->L+2 (13%), H-1->L+3 (-16%), H-1->L+4 (10%)                    |
| 15  | 32120.4454                    | 311.328186         | 0.0744                 | Singlet-A | H-2->L+2 (27%), H-1->L+3 (56%)                                                     |
| 16  | 32414.8398                    | 308.500676         | 0.0104                 | Singlet-A | H-1->L+4 (78%)                                                                     |
| 17  | 32673.7456                    | 306.056126         | 0.0616                 | Singlet-A | H-2->L+3 (42%), H-2->L+4 (-18%), H-1->L+2 (14%)                                    |
| 18  | 32981.045                     | 303.204462         | 0.0119                 | Singlet-A | H-3->L+4 (10%), H-2->L+3 (24%), H-2->L+4 (58%)                                     |
| 19  | 33243.177                     | 300.813608         | 0.0116                 | Singlet-A | H-3->L+1 (42%), H-3->L+2 (-12%), HOMO->L+5 (26%)                                   |
| 20  | 33444.817                     | 298.999992         | 0.0015                 | Singlet-A | H-5->L+1 (-13%), H-5->L+2 (12%), H-4->L+1 (-21%), H-4->L+2 (16%), HOMO->L+6 (28%)  |
| 21  | 33474.6597                    | 298.733433         | 0.0019                 | Singlet-A | H-3->L+1 (-30%), H-3->L+2 (-10%), HOMO->L+5 (44%)                                  |
| 22  | 33725.4998                    | 296.511543         | 0.0145                 | Singlet-A | H-5->L+3 (-10%), H-4->L+3 (-13%), H-3->L+2 (31%), H-2->L+2 (-16%), HOMO->L+5 (14%) |
| 23  | 33837.6117                    | 295.529132         | 0.0398                 | Singlet-A | H-4->L+1 (14%), H-3->L+3 (20%), HOMO->L+6 (36%)                                    |
| 24  | 34081.9994                    | 293.410017         | 0                      | Singlet-A | H-4->L+1 (27%), H-3->L+3 (-22%), H-2->L+3 (13%)                                    |
| 25  | 34636.1061                    | 288.716058         | 0.145                  | Singlet-A | H-5->L+3 (11%), H-4->L+3 (46%), H-3->L+2 (13%)                                     |
| 26  | 34680.4669                    | 288.346752         | 0.0037                 | Singlet-A | H-5->L+1 (12%), H-5->L+2 (-18%), H-4->L+2 (46%), H-3->L+4 (-10%)                   |
| 27  | 34801.4509                    | 287.344342         | 0.0001                 | Singlet-A | H-5->L+1 (10%), H-5->L+2 (-14%), H-4->L+1 (-10%), H-3->L+4 (36%), HOMO->L+6 (14%)  |
| 28  | 35003.0909                    | 285.689056         | 0.0242                 | Singlet-A | H-5->L+4 (23%), H-4->L+4 (53%)                                                     |
| 29  | 35288.6131                    | 283.377529         | 0.0407                 | Singlet-A | H-3->L+3 (28%), H-3->L+4 (26%)                                                     |
| 30  | 35411.2102                    | 282.396448         | 0.0124                 | Singlet-A | H-5->L+3 (47%), H-5->L+4 (-17%), H-4->L+3 (-22%)                                   |
| 31  | 35435.407                     | 282.203616         | 0.0189                 | Singlet-A | H-5->L+1 (43%), H-5->L+2 (26%), H-4->L+1 (-16%)                                    |
| 32  | 36321.0099                    | 275.322741         | 0.0148                 | Singlet-A | H-8->LUMO (95%)                                                                    |
| 33  | 36662.1848                    | 272.760613         | 0.0019                 | Singlet-A | H-7->LUMO (15%), H-5->L+4 (34%), H-4->L+4 (-29%)                                   |
| 34  | 37088.855                     | 269.622775         | 0.0003                 | Singlet-A | H-7->LUMO (82%)                                                                    |
| 35  | 37782.4966                    | 264.672822         | 0.0076                 | Singlet-A | H-2->L+6 (38%), H-1->L+5 (51%)                                                     |
| 36  | 37842.9886                    | 264.249742         | 0.023                  | Singlet-A | H-2->L+5 (49%), H-1->L+6 (36%)                                                     |
| 37  | 38154.3208                    | 262.093514         | 0.3323                 | Singlet-A | H-6->LUMO (64%)                                                                    |
| 38  | 38283.3704                    | 261.210021         | 0.0361                 | Singlet-A | H-11->LUMO (88%)                                                                   |
| 39  | 38679.3914                    | 258.535609         | 0.4447                 | Singlet-A | H-2->L+5 (-20%), H-1->L+6 (39%), HOMO->L+8 (11%)                                   |
| 40  | 38932.6512                    | 256.853815         | 0.1085                 | Singlet-A | H-2->L+6 (38%), H-1->L+5 (-25%)                                                    |
| 41  | 38989.917                     | 256.476566         | 0.0115                 | Singlet-A | H-9->LUMO (94%)                                                                    |
| 42  | 39389.9707                    | 253.87173          | 0.0001                 | Singlet-A | H-10->LUMO (-16%), HOMO->L+7 (-23%), HOMO->L+9 (10%), HOMO->L+10 (30%)             |
| 43  | 39477.8858                    | 253.306372         | 0.0006                 | Singlet-A | H-10->LUMO (82%)                                                                   |
| 44  | 40000.5366                    | 249.996646         | 0.0018                 | Singlet-A | HOMO->L+7 (68%), HOMO->L+10 (10%)                                                  |
| 45  | 40013.4416                    | 249.916018         | 0.0024                 | Singlet-A | H-3->L+5 (78%)                                                                     |
| 46  | 40169.9142                    | 248.942528         | 0.0081                 | Singlet-A | H-4->L+5 (34%), H-3->L+6 (39%)                                                     |
| 47  | 40415.915                     | 247.427282         | 0.1788                 | Singlet-A | H-4->L+6 (11%), HOMO->L+8 (40%)                                                    |
| 48  | 40447.3709                    | 247.234858         | 0.0018                 | Singlet-A | H-4->L+5 (45%), H-3->L+6 (-41%)                                                    |
| 49  | 40565.1286                    | 246.517152         | 0.0127                 | Singlet-A | H-5->L+6 (16%), H-4->L+6 (64%)                                                     |
| 50  | 41061.163                     | 243.539132         | 0.0029                 | Singlet-A | H-5->L+5 (82%)                                                                     |



| No. | Energy<br>(cm <sup>-1</sup> ) | Wavelength<br>(nm) | Oscillator<br>Strength | Symmetry  | Major contributions                                                   |
|-----|-------------------------------|--------------------|------------------------|-----------|-----------------------------------------------------------------------|
| 51  | 41328.941                     | 241.961196         | 0.0059                 | Singlet-A | H-5->L+6 (72%), H-4->L+6 (-14%)                                       |
| 52  | 41463.6365                    | 241.17518          | 0.0113                 | Singlet-A | H-5->L+10 (24%), H-4->L+10 (16%), H-1->L+10 (15%)                     |
| 53  | 41641.0797                    | 240.147472         | 0.0033                 | Singlet-A | H-3->L+10 (29%), H-2->L+10 (20%), HOMO->L+10 (13%)                    |
| 54  | 41854.0115                    | 238.925724         | 0.0447                 | Singlet-A | H-12->LUMO (63%), H-6->L+1 (24%)                                      |
| 55  | 41953.2184                    | 238.360736         | 0.0318                 | Singlet-A | H-13->LUMO (60%), H-6->L+4 (-15%)                                     |
| 56  | 43354.2131                    | 230.65809          | 0.012                  | Singlet-A | H-8->L+1 (87%)                                                        |
| 57  | 43471.9709                    | 230.033279         | 0.0047                 | Singlet-A | H-1->L+7 (83%)                                                        |
| 58  | 43530.8498                    | 229.722141         | 0.0104                 | Singlet-A | H-8->L+2 (83%)                                                        |
| 59  | 43789.7555                    | 228.363915         | 0.0043                 | Singlet-A | H-8->L+3 (50%), H-7->L+1 (29%)                                        |
| 60  | 43943.8085                    | 227.563344         | 0.0058                 | Singlet-A | H-7->L+1 (31%), H-7->L+2 (-29%)                                       |
| 61  | 44015.5923                    | 227.192217         | 0.0054                 | Singlet-A | H-13->LUMO (-10%), H-3->L+7 (14%), H-2->L+7 (51%)                     |
| 62  | 44089.7958                    | 226.80985          | 0.0044                 | Singlet-A | H-7->L+1 (13%), H-7->L+2 (29%), H-6->L+2 (-23%)                       |
| 63  | 44163.9994                    | 226.428769         | 0.0176                 | Singlet-A | H-6->L+1 (-20%), H-6->L+2 (26%)                                       |
| 64  | 44230.1373                    | 226.090187         | 0.0932                 | Singlet-A | HOMO->L+9 (36%), HOMO->L+10 (-14%)                                    |
| 65  | 44367.2525                    | 225.391464         | 0.0362                 | Singlet-A | H-14->LUMO (25%), H-12->LUMO (-11%), H-6->L+2 (43%)                   |
| 66  | 44588.2499                    | 224.274333         | 0.0011                 | Singlet-A | H-7->L+3 (47%), H-7->L+4 (-10%), H-1->L+8 (-20%)                      |
| 67  | 44657.6141                    | 223.92598          | 0.0147                 | Singlet-A | H-3->L+8 (16%), H-2->L+8 (25%)                                        |
| 68  | 44743.1094                    | 223.498101         | 0.0133                 | Singlet-A | H-15->LUMO (16%), H-6->L+3 (32%), H-2->L+7 (29%)                      |
| 69  | 44809.2474                    | 223.168221         | 0.0239                 | Singlet-A | H-8->L+3 (14%), H-8->L+4 (55%)                                        |
| 70  | 44931.8445                    | 222.559303         | 0.0038                 | Singlet-A | H-6->L+3 (-36%), H-6->L+4 (43%)                                       |
| 71  | 45125.4189                    | 221.604591         | 0.0139                 | Singlet-A | H-7->L+3 (16%), H-1->L+8 (40%)                                        |
| 72  | 45223.8192                    | 221.122412         | 0.0056                 | Singlet-A | H-11->L+1 (-15%), H-11->L+2 (27%), H-8->L+3 (-14%)                    |
| 73  | 45446.4298                    | 220.039287         | 0.0546                 | Singlet-A | H-11->L+1 (32%), HOMO->L+12 (19%)                                     |
| 74  | 45573.8662                    | 219.423999         | 0.0242                 | Singlet-A | H-14->LUMO (-12%), H-11->L+1 (35%), H-11->L+2 (23%), H-8->L+4 (11%)   |
| 75  | 45593.2237                    | 219.330839         | 0.0009                 | Singlet-A | H-7->L+3 (10%), H-7->L+4 (82%)                                        |
| 76  | 45764.2144                    | 218.511344         | 0.003                  | Singlet-A | H-11->L+3 (67%), H-11->L+4 (-11%)                                     |
| 77  | 45811.8014                    | 218.284365         | 0.0079                 | Singlet-A | H-9->L+1 (76%)                                                        |
| 78  | 45949.7232                    | 217.629167         | 0.0034                 | Singlet-A | H-14->LUMO (17%), H-11->L+2 (14%), H-5->L+7 (12%), H-4->L+7 (16%)     |
| 79  | 46044.0907                    | 217.183136         | 0.0003                 | Singlet-A | H-10->L+1 (-13%), H-3->L+7 (58%)                                      |
| 80  | 46172.3338                    | 216.579912         | 0.0216                 | Singlet-A | H-9->L+2 (53%)                                                        |
| 81  | 46309.449                     | 215.938652         | 0.0111                 | Singlet-A | H-10->L+1 (68%)                                                       |
| 82  | 46510.2824                    | 215.00622          | 0.0044                 | Singlet-A | H-10->L+2 (21%), H-9->L+3 (33%), H-2->L+9 (-14%)                      |
| 83  | 46655.4632                    | 214.337171         | 0.0167                 | Singlet-A | H-9->L+2 (12%), H-1->L+9 (35%), HOMO->L+13 (12%)                      |
| 84  | 46699.0174                    | 214.137268         | 0.0165                 | Singlet-A | H-5->L+8 (11%), H-4->L+8 (18%), HOMO->L+11 (18%)                      |
| 85  | 46832.0998                    | 213.528756         | 0.0049                 | Singlet-A | H-11->L+3 (14%), H-11->L+4 (70%)                                      |
| 86  | 46832.9064                    | 213.525078         | 0.0185                 | Singlet-A | H-14->LUMO (-12%), H-6->L+1 (14%), H-5->L+7 (12%), H-4->L+7 (22%)     |
| 87  | 46970.0216                    | 212.901754         | 0.0054                 | Singlet-A | H-16->LUMO (83%)                                                      |
| 88  | 47109.5565                    | 212.271156         | 0.0003                 | Singlet-A | H-10->L+2 (52%), H-9->L+3 (-40%)                                      |
| 89  | 47187.7928                    | 211.919215         | 0.0009                 | Singlet-A | H-3->L+8 (-11%), H-1->L+10 (39%)                                      |
| 90  | 47317.649                     | 211.337634         | 0.0643                 | Singlet-A | H-9->L+4 (23%), H-2->L+9 (23%)                                        |
| 91  | 47387.8197                    | 211.024691         | 0.0012                 | Singlet-A | H-10->L+3 (78%)                                                       |
| 92  | 47451.5379                    | 210.741326         | 0                      | Singlet-A | H-9->L+4 (50%), H-2->L+9 (-14%)                                       |
| 93  | 47560.4235                    | 210.258851         | 0.1716                 | Singlet-A | H-15->LUMO (31%), H-6->L+4 (-12%)                                     |
| 94  | 47663.6632                    | 209.803429         | 0.0154                 | Singlet-A | H-3->L+8 (28%), H-2->L+8 (-21%), H-1->L+10 (25%)                      |
| 95  | 47863.6901                    | 208.926641         | 0.0009                 | Singlet-A | H-10->L+4 (52%), H-5->L+7 (-20%), H-4->L+7 (17%)                      |
| 96  | 47893.5328                    | 208.796458         | 0.0002                 | Singlet-A | H-18->LUMO (38%), H-17->LUMO (-18%), H-3->L+9 (12%), H-2->L+10 (-14%) |
| 97  | 47937.8936                    | 208.603242         | 0.0021                 | Singlet-A | H-10->L+4 (34%), H-5->L+7 (37%), H-4->L+7 (-18%)                      |
| 98  | 47940.3133                    | 208.592713         | 0.0007                 | Singlet-A | H-18->LUMO (41%), H-3->L+9 (-16%), H-2->L+10 (22%)                    |
| 99  | 48054.0382                    | 208.099056         | 0.0075                 | Singlet-A | H-17->LUMO (49%), H-13->L+1 (10%)                                     |
| 100 | 48158.0845                    | 207.649455         | 0.0012                 | Singlet-A | H-19->LUMO (97%)                                                      |



**Table S17:** Energy and composition of TD-DFT calculated transitions of **4a**

| No. | Energy<br>(cm <sup>-1</sup> ) | Wavelength<br>(nm) | Oscillator<br>Strength | Symmetry  | Major contributions                                                |
|-----|-------------------------------|--------------------|------------------------|-----------|--------------------------------------------------------------------|
| 1   | 20548.7291                    | 486.648101         | 0.0001                 | Singlet-A | HOMO->LUMO (97%)                                                   |
| 2   | 23906.4384                    | 418.297357         | 0.0137                 | Singlet-A | H-1->LUMO (99%)                                                    |
| 3   | 24660.572                     | 405.505598         | 0.0003                 | Singlet-A | H-5->LUMO (12%), H-2->LUMO (80%)                                   |
| 4   | 26641.4834                    | 375.354475         | 0.0003                 | Singlet-A | H-5->LUMO (55%), H-3->LUMO (20%), H-2->LUMO (-18%)                 |
| 5   | 27945.6909                    | 357.836922         | 0.0655                 | Singlet-A | H-7->LUMO (57%), H-4->LUMO (37%)                                   |
| 6   | 28670.7883                    | 348.787061         | 0.0001                 | Singlet-A | HOMO->L+1 (96%)                                                    |
| 7   | 28733.7                       | 348.023401         | 0.0103                 | Singlet-A | H-7->LUMO (-31%), H-6->LUMO (-13%), H-4->LUMO (53%)                |
| 8   | 29481.3811                    | 339.197135         | 0                      | Singlet-A | H-5->LUMO (-24%), H-3->LUMO (74%)                                  |
| 9   | 29750.7722                    | 336.12573          | 0.0004                 | Singlet-A | HOMO->L+2 (94%)                                                    |
| 10  | 29970.1565                    | 333.665258         | 0.0003                 | Singlet-A | H-6->LUMO (80%)                                                    |
| 11  | 30071.783                     | 332.537648         | 0.0008                 | Singlet-A | HOMO->L+3 (89%)                                                    |
| 12  | 30697.6736                    | 325.757584         | 0.0023                 | Singlet-A | HOMO->L+4 (90%)                                                    |
| 13  | 31585.6962                    | 316.599006         | 0.0064                 | Singlet-A | H-1->L+1 (96%)                                                     |
| 14  | 32494.6893                    | 307.742595         | 0.0032                 | Singlet-A | H-8->LUMO (-28%), H-2->L+1 (41%), H-1->L+2 (-24%)                  |
| 15  | 32520.4992                    | 307.498355         | 0.0016                 | Singlet-A | H-8->LUMO (68%), H-2->L+1 (16%), H-1->L+2 (-11%)                   |
| 16  | 32867.32                      | 304.253587         | 0.0008                 | Singlet-A | H-2->L+1 (29%), H-1->L+2 (59%)                                     |
| 17  | 32911.6808                    | 303.843491         | 0.0001                 | Singlet-A | H-9->LUMO (98%)                                                    |
| 18  | 33306.0886                    | 300.245403         | 0.0174                 | Singlet-A | H-1->L+3 (82%)                                                     |
| 19  | 33873.9069                    | 295.212478         | 0.0165                 | Singlet-A | H-2->L+2 (77%)                                                     |
| 20  | 33998.9237                    | 294.126958         | 0.0107                 | Singlet-A | H-1->L+4 (80%)                                                     |
| 21  | 34262.6688                    | 291.862845         | 0.0228                 | Singlet-A | H-2->L+3 (64%)                                                     |
| 22  | 34601.424                     | 289.005447         | 0.0011                 | Singlet-A | H-10->LUMO (10%), H-5->L+1 (51%), H-3->L+1 (19%), H-2->L+1 (-10%)  |
| 23  | 34992.6056                    | 285.774661         | 0.0307                 | Singlet-A | H-2->L+4 (69%)                                                     |
| 24  | 35353.1379                    | 282.860323         | 0.0473                 | Singlet-A | HOMO->L+5 (75%)                                                    |
| 25  | 35467.6694                    | 281.946916         | 0.013                  | Singlet-A | H-7->L+1 (47%), H-4->L+1 (26%)                                     |
| 26  | 35966.9301                    | 278.033182         | 0.0153                 | Singlet-A | H-10->LUMO (-18%), H-7->L+2 (48%), H-4->L+2 (11%)                  |
| 27  | 36102.4322                    | 276.989649         | 0.0213                 | Singlet-A | H-12->LUMO (15%), H-5->L+2 (40%), H-3->L+2 (16%)                   |
| 28  | 36212.1243                    | 276.150604         | 0.0063                 | Singlet-A | H-7->L+3 (10%), H-5->L+3 (27%), H-3->L+3 (16%)                     |
| 29  | 36392.7938                    | 274.779674         | 0.0092                 | Singlet-A | H-4->L+1 (14%), HOMO->L+6 (29%)                                    |
| 30  | 36412.9578                    | 274.627512         | 0.0004                 | Singlet-A | H-7->L+1 (-17%), H-4->L+1 (39%)                                    |
| 31  | 36533.1352                    | 273.724112         | 0.0036                 | Singlet-A | H-5->L+1 (-10%), H-3->L+1 (30%), H-3->L+3 (-20%), HOMO->L+6 (-19%) |
| 32  | 36607.3387                    | 273.16927          | 0.0336                 | Singlet-A | H-12->LUMO (59%), HOMO->L+6 (14%)                                  |
| 33  | 36812.205                     | 271.649036         | 0.0015                 | Singlet-A | H-7->L+4 (35%), H-5->L+4 (-19%)                                    |
| 34  | 37096.9206                    | 269.564153         | 0.0027                 | Singlet-A | H-11->LUMO (80%)                                                   |
| 35  | 37133.2158                    | 269.300673         | 0.0052                 | Singlet-A | H-6->L+1 (49%), H-6->L+3 (-20%), H-4->L+3 (-11%)                   |
| 36  | 37523.5909                    | 266.499015         | 0.0175                 | Singlet-A | H-4->L+2 (-26%), H-4->L+3 (37%)                                    |
| 37  | 37594.5682                    | 265.995874         | 0.0037                 | Singlet-A | H-3->L+1 (23%), H-3->L+2 (-13%), H-3->L+3 (31%)                    |
| 38  | 37763.9458                    | 264.802838         | 0.0111                 | Singlet-A | H-4->L+2 (36%), H-4->L+3 (30%)                                     |
| 39  | 37813.1459                    | 264.458292         | 0.0269                 | Singlet-A | H-7->L+3 (34%), H-5->L+3 (-12%)                                    |
| 40  | 38153.5142                    | 262.099054         | 0.0326                 | Singlet-A | H-5->L+4 (16%), H-4->L+4 (37%)                                     |
| 41  | 38175.2914                    | 261.94954          | 0.0009                 | Singlet-A | H-6->L+1 (15%), H-6->L+2 (-20%), H-6->L+3 (41%)                    |
| 42  | 38240.6227                    | 261.502018         | 0.017                  | Singlet-A | H-13->LUMO (57%)                                                   |
| 43  | 38322.0853                    | 260.946134         | 0.0047                 | Singlet-A | H-13->LUMO (31%), H-7->L+4 (12%), H-4->L+4 (-23%)                  |
| 44  | 38584.2173                    | 259.173328         | 0.0789                 | Singlet-A | H-10->LUMO (-13%), H-5->L+2 (-13%), H-3->L+2 (40%)                 |
| 45  | 38639.0634                    | 258.805445         | 0.1907                 | Singlet-A | H-10->LUMO (33%), H-7->L+2 (19%), H-3->L+2 (16%)                   |
| 46  | 39112.5141                    | 255.672647         | 0.0065                 | Singlet-A | H-6->L+2 (56%), H-6->L+3 (14%)                                     |
| 47  | 39224.6259                    | 254.941883         | 0.0028                 | Singlet-A | H-2->L+5 (42%), H-1->L+5 (12%), H-1->L+6 (-10%)                    |
| 48  | 39316.5738                    | 254.345662         | 0.0151                 | Singlet-A | H-2->L+5 (-19%), H-1->L+5 (20%), HOMO->L+7 (11%)                   |
| 49  | 39698.8832                    | 251.896255         | 0.0029                 | Singlet-A | H-2->L+6 (13%), HOMO->L+7 (38%), HOMO->L+14 (-15%)                 |
| 50  | 39930.3659                    | 250.435972         | 0.119                  | Singlet-A | H-1->L+6 (32%), HOMO->L+11 (27%)                                   |

| No. | Energy<br>(cm <sup>-1</sup> ) | Wavelength<br>(nm) | Oscillator<br>Strength | Symmetry  | Major contributions                                                  |
|-----|-------------------------------|--------------------|------------------------|-----------|----------------------------------------------------------------------|
| 51  | 40048.1237                    | 249.699588         | 0.0086                 | Singlet-A | H-8->L+1 (71%)                                                       |
| 52  | 40408.656                     | 247.47173          | 0.0004                 | Singlet-A | H-9->L+1 (74%), H-9->L+4 (-12%)                                      |
| 53  | 40513.5088                    | 246.83125          | 0.0025                 | Singlet-A | H-5->L+4 (-21%), H-3->L+4 (73%)                                      |
| 54  | 40610.296                     | 246.242972         | 0.0557                 | Singlet-A | H-2->L+6 (22%), H-1->L+5 (12%)                                       |
| 55  | 40713.5357                    | 245.61856          | 0.0006                 | Singlet-A | H-14->LUMO (97%)                                                     |
| 56  | 40897.4314                    | 244.514134         | 0.0095                 | Singlet-A | HOMO->L+8 (90%)                                                      |
| 57  | 40949.0512                    | 244.205902         | 0.0007                 | Singlet-A | H-6->L+4 (74%), H-4->L+4 (10%)                                       |
| 58  | 41031.3203                    | 243.716262         | 0.0956                 | Singlet-A | H-8->L+4 (19%), H-5->L+5 (11%)                                       |
| 59  | 41270.0621                    | 242.306396         | 0.0543                 | Singlet-A | H-8->L+2 (26%), H-8->L+4 (18%), H-5->L+5 (-10%)                      |
| 60  | 41320.0688                    | 242.01315          | 0.0015                 | Singlet-A | H-15->LUMO (91%)                                                     |
| 61  | 41484.607                     | 241.053266         | 0.0182                 | Singlet-A | H-8->L+2 (-13%), H-4->L+5 (18%)                                      |
| 62  | 41524.935                     | 240.819161         | 0.0018                 | Singlet-A | H-9->L+4 (25%), H-8->L+2 (35%), H-4->L+5 (10%)                       |
| 63  | 41645.919                     | 240.119566         | 0.0005                 | Singlet-A | H-9->L+2 (28%), H-9->L+4 (14%), H-8->L+2 (-12%), H-8->L+4 (30%)      |
| 64  | 41721.7357                    | 239.683221         | 0.0553                 | Singlet-A | H-1->L+7 (15%)                                                       |
| 65  | 41910.4707                    | 238.603858         | 0.2171                 | Singlet-A |                                                                      |
| 66  | 41938.7003                    | 238.44325          | 0.0215                 | Singlet-A | H-5->L+5 (-14%), H-4->L+5 (17%), H-1->L+7 (10%)                      |
| 67  | 41971.7693                    | 238.255384         | 0.0042                 | Singlet-A | H-9->L+2 (59%), H-9->L+4 (-30%)                                      |
| 68  | 42263.744                     | 236.609421         | 0.0071                 | Singlet-A | H-7->L+5 (-11%), HOMO->L+7 (16%), HOMO->L+14 (18%)                   |
| 69  | 42625.8894                    | 234.59921          | 0.0033                 | Singlet-A | H-7->L+5 (23%), H-4->L+6 (34%)                                       |
| 70  | 42692.8339                    | 234.231347         | 0.0287                 | Singlet-A | H-7->L+5 (35%), H-4->L+6 (-16%)                                      |
| 71  | 43007.3923                    | 232.518166         | 0.017                  | Singlet-A | H-8->L+3 (42%), H-5->L+6 (-18%)                                      |
| 72  | 43013.8448                    | 232.483286         | 0.0069                 | Singlet-A | H-8->L+3 (49%), H-5->L+6 (18%)                                       |
| 73  | 43150.1534                    | 231.748886         | 0.0018                 | Singlet-A | H-7->L+6 (-18%), H-1->L+7 (41%)                                      |
| 74  | 43344.5344                    | 230.709596         | 0.038                  | Singlet-A | H-16->LUMO (14%), H-10->L+1 (44%), H-1->L+8 (24%)                    |
| 75  | 43401.8002                    | 230.40519          | 0.0003                 | Singlet-A | H-17->LUMO (12%), H-10->L+2 (27%), H-9->L+3 (45%)                    |
| 76  | 43405.833                     | 230.383783         | 0.0025                 | Singlet-A | H-17->LUMO (-11%), H-10->L+2 (-23%), H-9->L+3 (49%)                  |
| 77  | 43652.6403                    | 229.081218         | 0.0123                 | Singlet-A | H-7->L+6 (11%), H-3->L+5 (39%)                                       |
| 78  | 43835.7294                    | 228.124412         | 0.041                  | Singlet-A | H-7->L+6 (20%), H-5->L+5 (15%), H-3->L+5 (-15%), HOMO->L+9 (25%)     |
| 79  | 43878.4771                    | 227.902167         | 0.0202                 | Singlet-A | H-10->L+1 (-15%), H-1->L+8 (64%)                                     |
| 80  | 43945.4216                    | 227.554991         | 0.0175                 | Singlet-A | H-6->L+5 (13%), HOMO->L+9 (50%)                                      |
| 81  | 43994.6218                    | 227.300511         | 0.045                  | Singlet-A | H-7->L+6 (11%), H-6->L+5 (43%), HOMO->L+9 (-12%)                     |
| 82  | 44169.6453                    | 226.399826         | 0.007                  | Singlet-A | H-2->L+7 (12%), HOMO->L+10 (58%)                                     |
| 83  | 44377.7378                    | 225.33821          | 0.007                  | Singlet-A | H-2->L+7 (23%), H-1->L+11 (25%), HOMO->L+13 (21%)                    |
| 84  | 44568.8925                    | 224.371741         | 0.0012                 | Singlet-A | H-12->L+1 (76%)                                                      |
| 85  | 44824.572                     | 223.091924         | 0.0033                 | Singlet-A | H-9->L+7 (18%), H-9->L+9 (18%), H-8->L+7 (25%), H-8->L+9 (-12%)      |
| 86  | 44839.8966                    | 223.015679         | 0.0028                 | Singlet-A | H-2->L+7 (20%)                                                       |
| 87  | 44868.9328                    | 222.871358         | 0.0011                 | Singlet-A | H-6->L+5 (11%), H-6->L+10 (12%), H-3->L+12 (10%), HOMO->L+12 (12%)   |
| 88  | 44965.72                      | 222.391635         | 0.002                  | Singlet-A | H-12->L+2 (-19%), H-11->L+1 (58%)                                    |
| 89  | 45023.7923                    | 222.104791         | 0.0072                 | Singlet-A | H-2->L+8 (69%)                                                       |
| 90  | 45107.6746                    | 221.691765         | 0.002                  | Singlet-A | H-5->L+6 (-22%), H-3->L+6 (61%)                                      |
| 91  | 45302.8621                    | 220.736606         | 0.0209                 | Singlet-A | H-11->L+1 (12%), H-2->L+11 (-11%), H-1->L+13 (16%), HOMO->L+15 (11%) |
| 92  | 45458.5282                    | 219.980725         | 0.0031                 | Singlet-A | H-6->L+6 (56%), HOMO->L+12 (-12%)                                    |
| 93  | 45597.2565                    | 219.31144          | 0.0433                 | Singlet-A | H-1->L+10 (12%)                                                      |
| 94  | 45694.0437                    | 218.846904         | 0.0078                 | Singlet-A | H-10->L+3 (81%)                                                      |
| 95  | 45723.0798                    | 218.707927         | 0.0038                 | Singlet-A | H-12->L+2 (46%), HOMO->L+12 (14%)                                    |
| 96  | 45772.28                      | 218.47284          | 0.0084                 | Singlet-A | H-1->L+10 (42%), HOMO->L+12 (23%)                                    |
| 97  | 45931.9789                    | 217.713241         | 0.0167                 | Singlet-A | H-1->L+9 (68%)                                                       |
| 98  | 46006.1824                    | 217.362091         | 0.03                   | Singlet-A | H-12->L+3 (15%), H-1->L+9 (-14%)                                     |
| 99  | 46174.7534                    | 216.568563         | 0.054                  | Singlet-A | H-12->L+3 (10%)                                                      |
| 100 | 46239.2782                    | 216.266351         | 0.016                  | Singlet-A | H-12->L+3 (-20%), H-11->L+2 (40%)                                    |

**Table S18:** Energy and composition of TD-DFT calculated transitions of **4b**

| No. | Energy<br>(cm <sup>-1</sup> ) | Wavelength<br>(nm) | Oscillator<br>Strength | Symmetry  | Major contributions                                                     |
|-----|-------------------------------|--------------------|------------------------|-----------|-------------------------------------------------------------------------|
| 1   | 22515.1224                    | 444.145931         | 0.0001                 | Singlet-A | HOMO->LUMO (97%)                                                        |
| 2   | 26011.56                      | 384.444455         | 0.0247                 | Singlet-A | H-1->LUMO (98%)                                                         |
| 3   | 26589.8635                    | 376.083164         | 0.001                  | Singlet-A | H-3->LUMO (-22%), H-2->LUMO (76%)                                       |
| 4   | 28630.4603                    | 349.278352         | 0.0007                 | Singlet-A | H-3->LUMO (71%), H-2->LUMO (22%)                                        |
| 5   | 29223.2819                    | 342.192914         | 0.0011                 | Singlet-A | HOMO->L+1 (80%)                                                         |
| 6   | 29395.0792                    | 340.192994         | 0.0902                 | Singlet-A | H-5->LUMO (25%), H-4->LUMO (61%)                                        |
| 7   | 30124.2094                    | 331.958919         | 0.0007                 | Singlet-A | HOMO->L+1 (-10%), HOMO->L+2 (68%),<br>HOMO->L+3 (-15%)                  |
| 8   | 30529.1026                    | 327.556304         | 0.0021                 | Singlet-A | HOMO->L+3 (-22%), HOMO->L+4 (64%)                                       |
| 9   | 30804.1395                    | 324.631694         | 0.0041                 | Singlet-A | H-5->LUMO (53%), H-4->LUMO (-24%)                                       |
| 10  | 31043.6878                    | 322.126677         | 0.0001                 | Singlet-A | HOMO->L+2 (15%), HOMO->L+3 (46%),<br>HOMO->L+4 (19%)                    |
| 11  | 32068.8256                    | 311.829318         | 0                      | Singlet-A | H-6->LUMO (88%), H-5->LUMO (10%)                                        |
| 12  | 32416.453                     | 308.485324         | 0.015                  | Singlet-A | H-1->L+1 (87%)                                                          |
| 13  | 32605.9946                    | 306.692071         | 0.0002                 | Singlet-A | H-7->LUMO (97%)                                                         |
| 14  | 33155.2619                    | 301.61125          | 0.003                  | Singlet-A | H-2->L+1 (47%), H-1->L+2 (13%)                                          |
| 15  | 33304.4755                    | 300.259945         | 0.0331                 | Singlet-A | H-2->L+1 (-24%), H-1->L+2 (55%)                                         |
| 16  | 33949.7235                    | 294.553209         | 0.0006                 | Singlet-A | H-2->L+2 (11%), H-1->L+3 (-28%), H-1->L+4<br>(38%)                      |
| 17  | 34142.4914                    | 292.890167         | 0.0142                 | Singlet-A | H-2->L+2 (23%), H-1->L+3 (49%)                                          |
| 18  | 34337.6789                    | 291.225276         | 0.0076                 | Singlet-A | H-2->L+2 (-24%), H-1->L+2 (15%), H-1->L+4<br>(27%)                      |
| 19  | 34731.2802                    | 287.924889         | 0.0276                 | Singlet-A | H-2->L+3 (-22%), H-2->L+4 (35%)                                         |
| 20  | 34877.2675                    | 286.719709         | 0.0004                 | Singlet-A | H-8->LUMO (96%)                                                         |
| 21  | 35017.609                     | 285.570611         | 0.0455                 | Singlet-A | H-3->L+1 (-18%), HOMO->L+5 (57%)                                        |
| 22  | 35328.9411                    | 283.054054         | 0.0165                 | Singlet-A | H-3->L+1 (26%), H-2->L+3 (20%), HOMO-<br>>L+5 (13%)                     |
| 23  | 35345.0723                    | 282.92487          | 0.0228                 | Singlet-A | H-3->L+1 (22%), H-2->L+3 (-22%), H-2->L+4 (-<br>17%)                    |
| 24  | 35418.4693                    | 282.338571         | 0.0002                 | Singlet-A | H-9->LUMO (98%)                                                         |
| 25  | 35728.1883                    | 279.891046         | 0.025                  | Singlet-A | H-5->L+1 (15%), H-4->L+1 (43%)                                          |
| 26  | 36068.5566                    | 277.249797         | 0.0078                 | Singlet-A | H-3->L+2 (23%), HOMO->L+6 (38%)                                         |
| 27  | 36251.6458                    | 275.849545         | 0.0243                 | Singlet-A | H-5->L+2 (11%), H-4->L+2 (16%), HOMO-<br>>L+6 (13%)                     |
| 28  | 36516.1974                    | 273.851077         | 0.0164                 | Singlet-A | H-4->L+4 (-11%), H-3->L+2 (21%), HOMO-<br>>L+6 (-16%)                   |
| 29  | 36921.8971                    | 270.841988         | 0.0212                 | Singlet-A | H-10->LUMO (-16%), H-5->L+3 (15%), H-4-<br>>L+3 (19%)                   |
| 30  | 37012.2318                    | 270.180951         | 0.0081                 | Singlet-A | H-5->L+1 (33%), H-4->L+1 (-21%)                                         |
| 31  | 37131.6027                    | 269.312372         | 0.0053                 | Singlet-A | H-6->L+1 (33%), H-6->L+2 (21%), H-6->L+3 (-<br>10%)                     |
| 32  | 37189.675                     | 268.891836         | 0.0154                 | Singlet-A | H-5->L+1 (-16%), H-3->L+3 (26%)                                         |
| 33  | 37509.0728                    | 266.602165         | 0.0588                 | Singlet-A | H-4->L+2 (-16%), H-3->L+3 (19%)                                         |
| 34  | 37881.7035                    | 263.979681         | 0.0007                 | Singlet-A | H-5->L+2 (32%), H-4->L+2 (-13%), H-4->L+4<br>(10%)                      |
| 35  | 37930.9037                    | 263.637273         | 0.0069                 | Singlet-A | H-12->LUMO (33%), H-3->L+4 (14%), H-1-<br>>L+5 (11%)                    |
| 36  | 37969.6186                    | 263.368461         | 0.002                  | Singlet-A | H-7->L+1 (39%), H-7->L+2 (28%), H-7->L+3 (-<br>14%)                     |
| 37  | 38158.3536                    | 262.065814         | 0.0309                 | Singlet-A | H-12->LUMO (51%), H-1->L+5 (-14%)                                       |
| 38  | 38454.3611                    | 260.048528         | 0.0012                 | Singlet-A | H-5->L+3 (-10%), H-5->L+4 (23%), H-4->L+3<br>(11%), H-4->L+4 (-20%)     |
| 39  | 38703.5882                    | 258.373977         | 0.2749                 | Singlet-A | H-10->LUMO (36%), H-4->L+3 (26%)                                        |
| 40  | 39045.5696                    | 256.111003         | 0.0276                 | Singlet-A | H-6->L+1 (36%), H-6->L+2 (-30%)                                         |
| 41  | 39056.0549                    | 256.042246         | 0.0033                 | Singlet-A | H-2->L+5 (50%), H-1->L+6 (-13%)                                         |
| 42  | 39080.2517                    | 255.883715         | 0.0448                 | Singlet-A | H-11->LUMO (34%), H-6->L+2 (10%), H-5-<br>>L+3 (-19%)                   |
| 43  | 39187.5242                    | 255.183256         | 0.0222                 | Singlet-A | H-2->L+6 (-14%), H-1->L+5 (18%), HOMO-<br>>L+7 (-17%)                   |
| 44  | 39333.5115                    | 254.236136         | 0.0116                 | Singlet-A | H-11->LUMO (43%), H-5->L+3 (22%)                                        |
| 45  | 39466.5939                    | 253.378845         | 0.0092                 | Singlet-A | H-5->L+4 (11%), H-2->L+6 (-13%), HOMO-<br>>L+7 (38%), HOMO->L+14 (-13%) |
| 46  | 39581.932                     | 252.640523         | 0.0037                 | Singlet-A | H-7->L+1 (-44%), H-7->L+2 (47%)                                         |
| 47  | 39815.0278                    | 251.161447         | 0.1501                 | Singlet-A | H-1->L+6 (37%), HOMO->L+11 (-23%)                                       |
| 48  | 39958.5955                    | 250.259046         | 0.0053                 | Singlet-A | H-13->LUMO (92%)                                                        |
| 49  | 40363.4886                    | 247.748654         | 0.0728                 | Singlet-A | H-2->L+6 (28%), H-1->L+5 (11%)                                          |
| 50  | 40426.4003                    | 247.363107         | 0.0033                 | Singlet-A | H-6->L+2 (11%), H-6->L+3 (69%)                                          |

| No. | Energy<br>(cm <sup>-1</sup> ) | Wavelength<br>(nm) | Oscillator<br>Strength | Symmetry  | Major contributions                                                                |
|-----|-------------------------------|--------------------|------------------------|-----------|------------------------------------------------------------------------------------|
| 51  | 40680.4667                    | 245.818222         | 0.0473                 | Singlet-A | H-8->L+1 (12%), H-8->L+4 (12%), H-3->L+5 (19%), HOMO->L+11 (-16%)                  |
| 52  | 40935.3397                    | 244.287701         | 0.0227                 | Singlet-A | H-8->L+1 (27%), H-8->L+4 (17%), H-3->L+5 (-14%)                                    |
| 53  | 40971.6349                    | 244.071295         | 0.0019                 | Singlet-A | H-7->L+2 (12%), H-7->L+3 (77%)                                                     |
| 54  | 41028.0941                    | 243.735426         | 0                      | Singlet-A | H-6->L+4 (77%), H-5->L+4 (10%)                                                     |
| 55  | 41141.819                     | 243.061688         | 0.0081                 | Singlet-A | H-4->L+5 (30%), H-3->L+14 (-15%), HOMO->L+7 (-13%)                                 |
| 56  | 41425.7282                    | 241.395877         | 0.0012                 | Singlet-A | H-9->L+1 (13%), H-3->L+5 (11%)                                                     |
| 57  | 41469.2824                    | 241.142345         | 0.0013                 | Singlet-A | H-9->L+1 (33%), H-9->L+4 (20%)                                                     |
| 58  | 41511.2235                    | 240.898705         | 0.0005                 | Singlet-A | H-7->L+4 (89%)                                                                     |
| 59  | 41559.6171                    | 240.618194         | 0.0194                 | Singlet-A | H-4->L+5 (-12%), H-3->L+6 (-12%), H-1->L+7 (16%)                                   |
| 60  | 41710.4438                    | 239.748108         | 0.2087                 | Singlet-A | H-4->L+6 (10%), H-3->L+5 (15%), H-2->L+5 (12%), HOMO->L+15 (10%)                   |
| 61  | 41895.9526                    | 238.686541         | 0.0055                 | Singlet-A | H-5->L+5 (21%), HOMO->L+7 (13%), HOMO->L+10 (13%), HOMO->L+14 (18%)                |
| 62  | 42028.2285                    | 237.93532          | 0.0018                 | Singlet-A | H-8->L+1 (43%), H-8->L+4 (-38%)                                                    |
| 63  | 42200.8323                    | 236.962151         | 0.0006                 | Singlet-A | H-5->L+5 (30%)                                                                     |
| 64  | 42400.8592                    | 235.844277         | 0.0091                 | Singlet-A | HOMO->L+10 (69%)                                                                   |
| 65  | 42517.0038                    | 235.200016         | 0.0568                 | Singlet-A | H-4->L+6 (45%)                                                                     |
| 66  | 42570.2368                    | 234.905905         | 0.0005                 | Singlet-A | H-9->L+1 (45%), H-9->L+4 (-40%)                                                    |
| 67  | 42669.4437                    | 234.359746         | 0.0633                 | Singlet-A | H-16->LUMO (35%), H-10->L+1 (41%)                                                  |
| 68  | 42694.447                     | 234.222497         | 0.0174                 | Singlet-A | H-3->L+6 (40%), H-2->L+6 (11%)                                                     |
| 69  | 42817.0442                    | 233.551853         | 0.0326                 | Singlet-A | H-5->L+6 (18%), H-1->L+7 (35%)                                                     |
| 70  | 42886.4083                    | 233.174108         | 0.004                  | Singlet-A | H-17->LUMO (30%), H-10->L+2 (-13%), H-10->L+3 (-19%)                               |
| 71  | 43033.2022                    | 232.378709         | 0.0052                 | Singlet-A | H-14->LUMO (86%)                                                                   |
| 72  | 43157.4125                    | 231.709906         | 0.0076                 | Singlet-A | H-8->L+2 (44%), H-8->L+3 (18%), H-8->L+4 (20%)                                     |
| 73  | 43289.6883                    | 231.001894         | 0.0443                 | Singlet-A | H-5->L+6 (-11%), HOMO->L+8 (53%)                                                   |
| 74  | 43422.7707                    | 230.293918         | 0.0705                 | Singlet-A | H-5->L+6 (14%), HOMO->L+8 (38%)                                                    |
| 75  | 43446.9675                    | 230.165661         | 0.0106                 | Singlet-A | H-8->L+2 (-22%), H-8->L+3 (66%)                                                    |
| 76  | 43610.6992                    | 229.301529         | 0.0015                 | Singlet-A | H-15->LUMO (88%)                                                                   |
| 77  | 43641.3485                    | 229.140491         | 0.0004                 | Singlet-A | H-9->L+2 (50%), H-9->L+3 (23%), H-9->L+4 (24%)                                     |
| 78  | 43732.4898                    | 228.662947         | 0.0039                 | Singlet-A | HOMO->L+9 (54%)                                                                    |
| 79  | 43970.425                     | 227.425594         | 0.0014                 | Singlet-A | H-9->L+2 (-25%), H-9->L+3 (71%)                                                    |
| 80  | 44041.4022                    | 227.059074         | 0.0107                 | Singlet-A | H-6->L+5 (46%)                                                                     |
| 81  | 44221.2651                    | 226.135548         | 0.0022                 | Singlet-A | H-10->L+1 (14%), H-10->L+2 (41%), H-10->L+3 (-26%)                                 |
| 82  | 44272.885                     | 225.871885         | 0.0057                 | Singlet-A | H-6->L+5 (23%), H-2->L+7 (24%), H-1->L+11 (11%), HOMO->L+13 (-12%)                 |
| 83  | 44317.2458                    | 225.645792         | 0.0051                 | Singlet-A | H-7->L+5 (33%), HOMO->L+12 (10%)                                                   |
| 84  | 44597.9286                    | 224.22566          | 0.0047                 | Singlet-A | H-2->L+7 (16%), H-1->L+11 (-16%), HOMO->L+12 (10%), HOMO->L+13 (18%)               |
| 85  | 44708.4274                    | 223.671477         | 0.0103                 | Singlet-A | H-7->L+5 (-26%), HOMO->L+12 (45%)                                                  |
| 86  | 44871.3525                    | 222.85934          | 0.0026                 | Singlet-A | H-9->L+7 (35%), H-9->L+8 (11%), H-8->L+7 (16%), H-8->L+8 (-25%)                    |
| 87  | 44900.3886                    | 222.715221         | 0.0049                 | Singlet-A | H-12->L+1 (11%), H-10->L+2 (-17%), H-10->L+4 (60%)                                 |
| 88  | 44941.5232                    | 222.511372         | 0.0071                 | Singlet-A | H-12->L+1 (76%)                                                                    |
| 89  | 45050.4088                    | 221.973568         | 0.0047                 | Singlet-A | H-2->L+11 (-13%), H-1->L+10 (30%)                                                  |
| 90  | 45217.3667                    | 221.153966         | 0.0068                 | Singlet-A | H-7->L+5 (15%), H-7->L+9 (-13%), H-6->L+6 (17%), H-6->L+12 (10%), HOMO->L+12 (14%) |
| 91  | 45353.6754                    | 220.489297         | 0.0044                 | Singlet-A | H-1->L+9 (23%), H-1->L+10 (-20%)                                                   |
| 92  | 45402.069                     | 220.25428          | 0.008                  | Singlet-A | H-6->L+6 (60%)                                                                     |
| 93  | 45546.4432                    | 219.556112         | 0.0247                 | Singlet-A | H-1->L+9 (31%), H-1->L+10 (24%)                                                    |
| 94  | 45577.0925                    | 219.408467         | 0.0062                 | Singlet-A | H-1->L+8 (78%)                                                                     |
| 95  | 45679.5256                    | 218.916459         | 0.0536                 | Singlet-A | H-12->L+2 (25%), H-11->L+1 (-12%), H-1->L+9 (-10%)                                 |
| 96  | 45715.0142                    | 218.746514         | 0.0326                 | Singlet-A | H-12->L+3 (-13%), H-11->L+1 (51%)                                                  |
| 97  | 45814.2211                    | 218.272837         | 0.0188                 | Singlet-A | H-7->L+6 (59%)                                                                     |
| 98  | 45910.2018                    | 217.816512         | 0.0317                 | Singlet-A | H-12->L+2 (19%), H-7->L+6 (18%)                                                    |
| 99  | 46056.9957                    | 217.122282         | 0.0339                 | Singlet-A | H-12->L+2 (18%)                                                                    |
| 100 | 46229.5995                    | 216.311629         | 0.0165                 | Singlet-A | H-2->L+10 (40%)                                                                    |
